# Supplementary material for: Radical-Induced Cascade Annulation/Hydrocarbonylation for Construction of 2-Aryl-4H-chromen-4-ones
Source: MDPI journal article supplement (doi:10.3390/molecules27217412), 2022-11-01
Supplement: s1 [file s1]

## *Supporting Information*

# Radical-Induced Cascade Annulation/Hydrocarbonylation for Construction of 2-Aryl-4*H*-chromen-4-ones

Xinwei He \*, Keke Xu, Yanan Liu, Demao Wang, Qiang Tang, Wenjie Hui, Haoyu Chen  
and Yongjia Shang

Key Laboratory of Functional Molecular Solids, Ministry of Education, Anhui  
Laboratory of Molecule-Based Materials (State Key Laboratory Cultivation  
Base), College of Chemistry and Materials Science, Anhui Normal University,  
Wuhu 241000, China

\* Correspondence: xinweihe@mail.ahnu.edu.cn

### Table of contents

|                                                             |     |
|-------------------------------------------------------------|-----|
| 1. X-ray crystallographic data of compound <b>2bo</b> ----- | S2  |
| 2. NMR spectra for all compounds-----                       | S3  |
| 3. GC-MS spectra for mechanistic investigations-----        | S56 |

## 1. X-ray crystallographic data of compound **2bo**

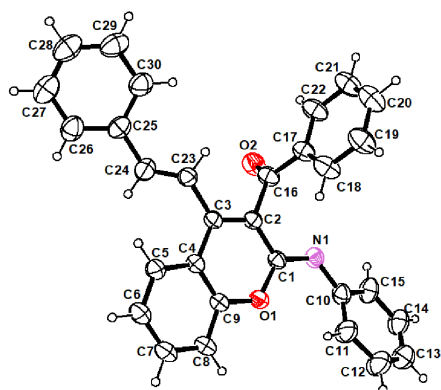

The purified compound **2bo** is dissolved in a mixed solvent of ethyl acetate and petroleum ether, and placed in a dark cabinet to slowly evaporate. After several days, a colourless bulk crystal was obtained. The X-ray crystal-structure determinations were obtained on a Bruker Smart CCD APEX-2 diffractometer (graphite-monochromated Mo  $K\alpha$  radiation,  $\lambda=0.71073$  nm) at 296(2) K.

**Figure S1.** ORTEP drawing of compound **2bo** (30% probability for the thermal ellipsoid).

**Table S1.** Crystal data and structure refinement for compound **2bo**.

|                                      |                                                                                                                              |
|--------------------------------------|------------------------------------------------------------------------------------------------------------------------------|
| CCDC number                          | 2195370                                                                                                                      |
| Identification code                  | 210920b_0m_a                                                                                                                 |
| Empirical formula                    | C <sub>25</sub> H <sub>22</sub> O <sub>2</sub>                                                                               |
| Formula weight                       | 354.42                                                                                                                       |
| Temperature                          | 293.15 K                                                                                                                     |
| Wavelength                           | 0.71073 Å                                                                                                                    |
| Crystal system                       | Monoclinic                                                                                                                   |
| Space group                          | P2 <sub>1</sub> /c                                                                                                           |
| Unit cell dimensions                 | a = 10.684(3) Å $\alpha = 90^\circ$ .<br>b = 9.951(2) Å $\beta = 93.881(3)^\circ$ .<br>c = 18.236(4) Å $\gamma = 90^\circ$ . |
| Volume                               | 1934.3(8) Å <sup>3</sup>                                                                                                     |
| Z                                    | 4                                                                                                                            |
| Density (calculated)                 | 1.217 g/cm <sup>3</sup>                                                                                                      |
| Absorption coefficient               | 0.076 mm <sup>-1</sup>                                                                                                       |
| F(000)                               | 752.0                                                                                                                        |
| Crystal size                         | 0.21 × 0.2 × 0.19 mm <sup>3</sup>                                                                                            |
| 2 $\theta$ range for data collection | 3.82 to 55.092°                                                                                                              |
| Index ranges                         | -13 ≤ h ≤ 13, -12 ≤ k ≤ 12, -23 ≤ l ≤ 23                                                                                     |
| Reflections collected                | 21949                                                                                                                        |
| Independent reflections              | 4407 [R(int) = 0.0427, R(sigma) = 0.0413]                                                                                    |
| Data / restraints / parameters       | 4407 / 0 / 246                                                                                                               |
| Goodness-of-fit on F <sup>2</sup>    | 1.049                                                                                                                        |
| Final R indices [I > 2sigma(I)]      | R1 = 0.0507, wR2 = 0.1302                                                                                                    |
| Final R indices (all data)           | R1 = 0.0946, wR2 = 0.1521                                                                                                    |
| Largest diff. peak and hole          | 0.20 and -0.17 eÅ <sup>-3</sup>                                                                                              |



## 2. NMR spectra for all compounds

### 2-Phenyl-4H-chromen-4-one (2aa)

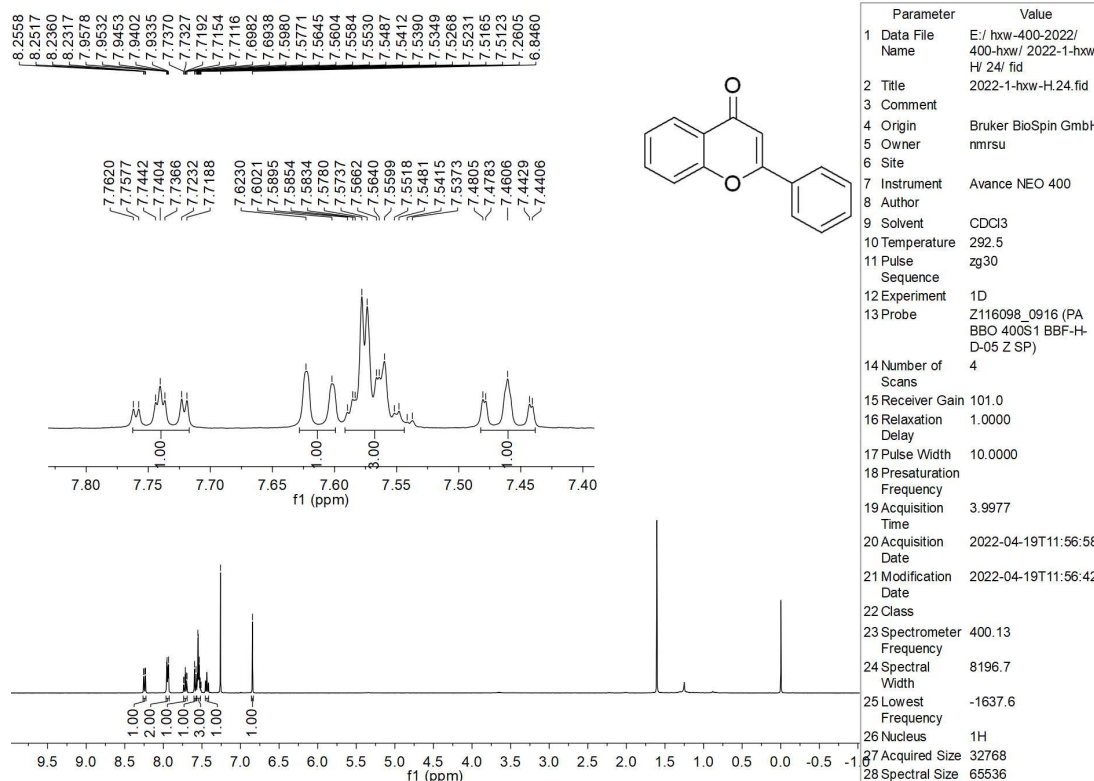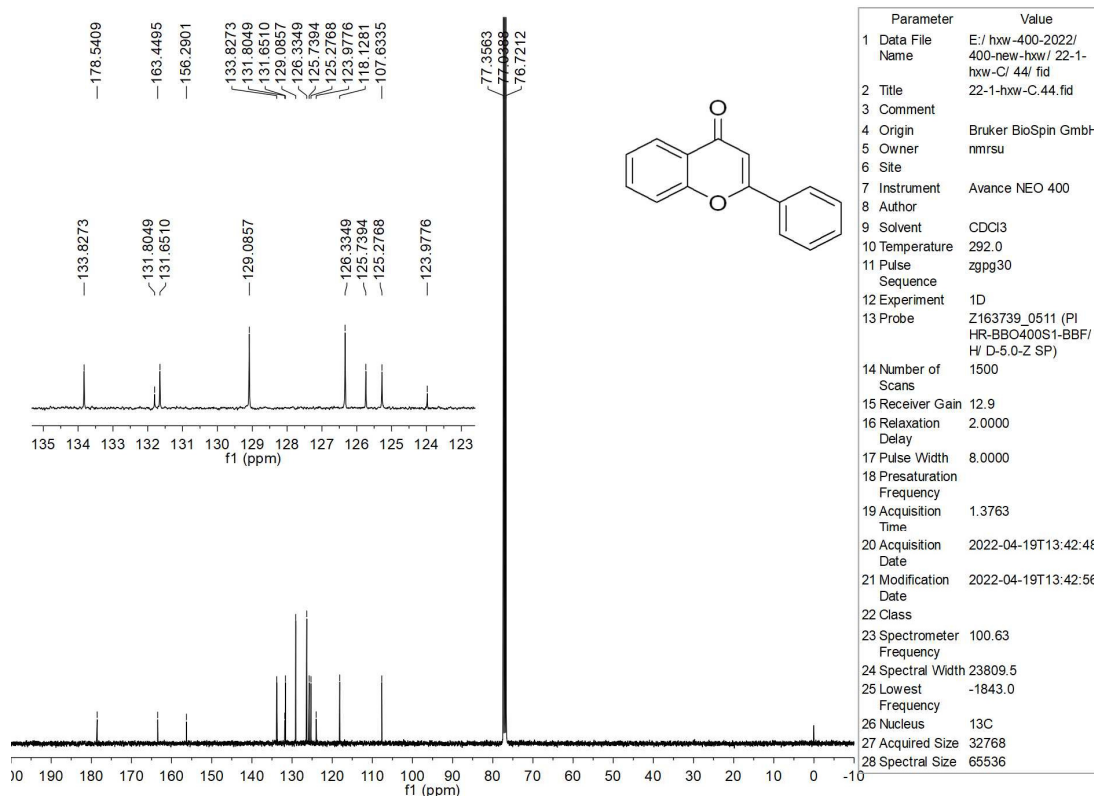

# 6-Methyl-2-phenyl-4H-chromen-4-one (2ba)

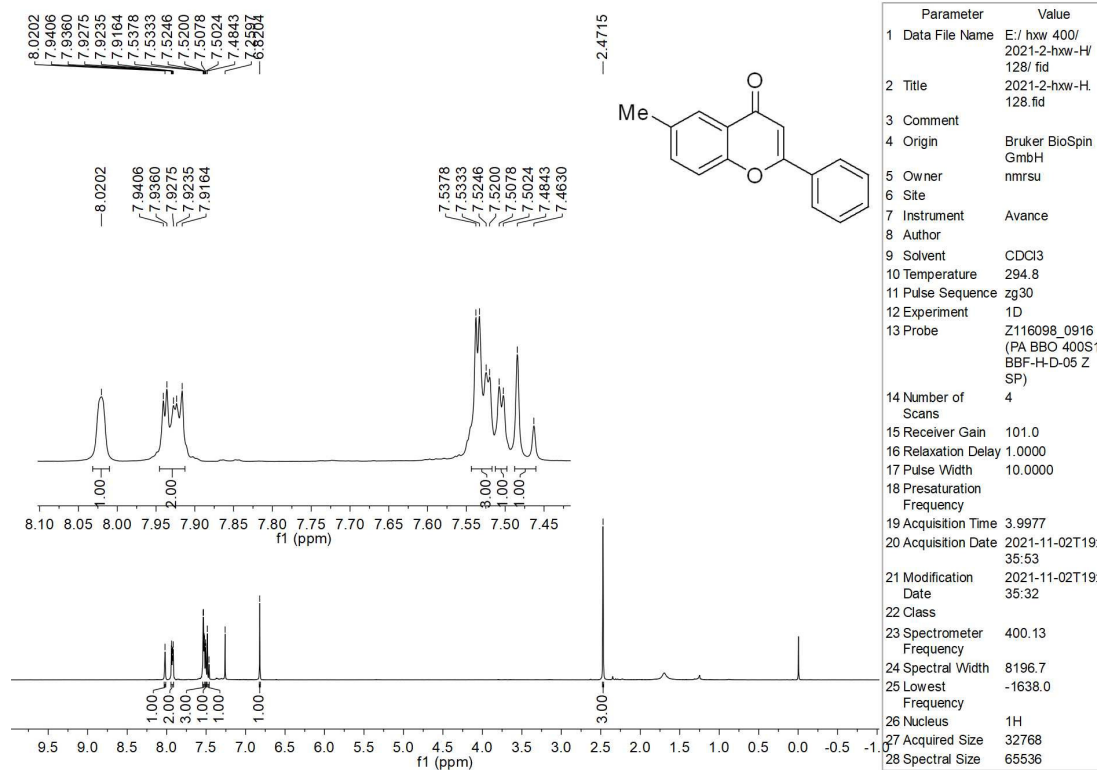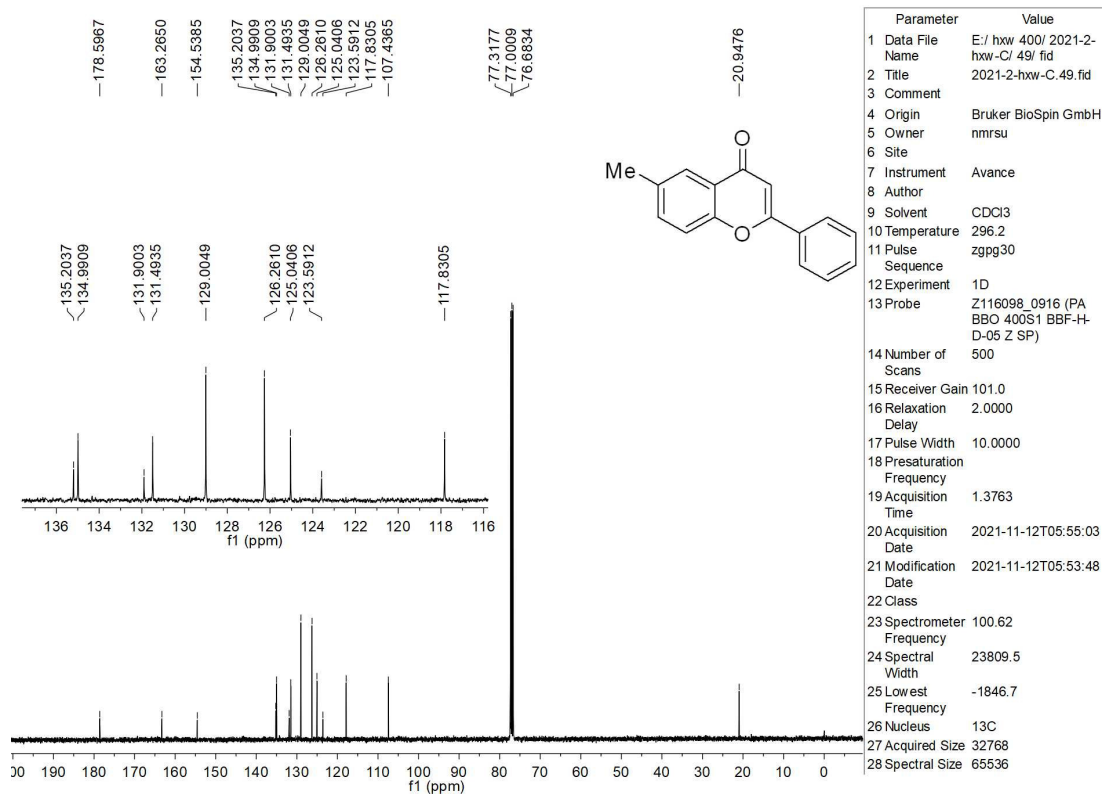

# 6-Methoxy-2-phenyl-4H-chromen-4-one (2ca)

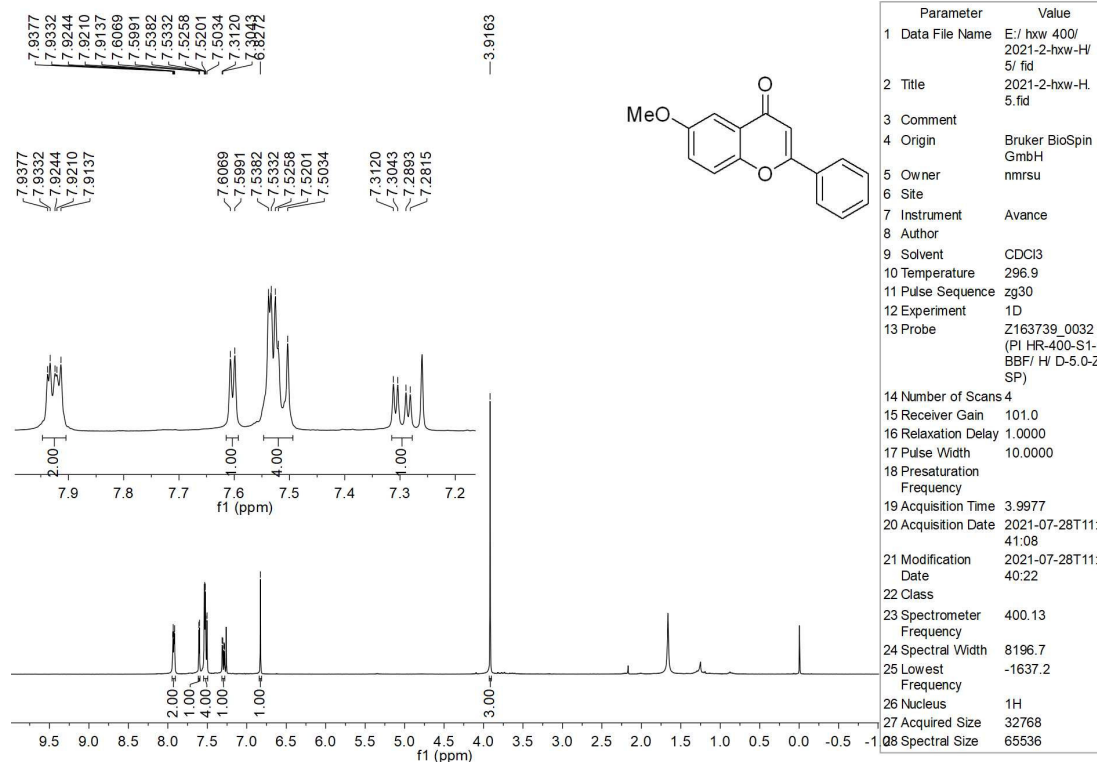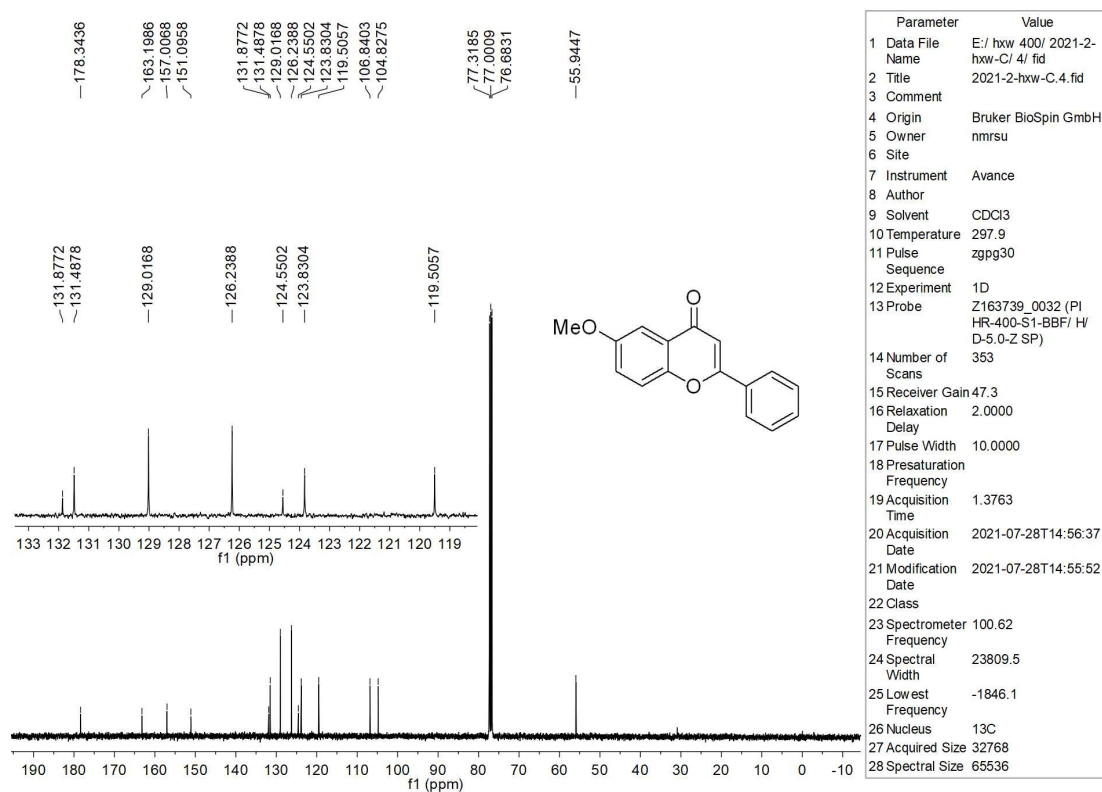

The figure displays two  $^1\text{H}$  NMR spectra of compound **1**. The top spectrum, recorded in  $\text{CDCl}_3$ , shows a complex multiplet between 7.3 and 8.4 ppm. The bottom spectrum, recorded in  $\text{DMSO}-d_6$ , shows a similar pattern with additional peaks at lower chemical shifts. Both spectra include integration values and a reference peak at 0 ppm.

**Top Spectrum ( $\text{CDCl}_3$ ):**

- Chemical shift range: 7.3 to 8.4 ppm.
- Integration values: 2.00, 1.00, 4.00, 1.00.
- Peak list (ppm): 7.9384, 7.9345, 7.9309, 7.9244, 7.9197, 7.9144, 7.8865, 7.8806, 7.8681, 7.8604, 7.8090, 7.5976, 7.5852, 7.5748, 7.5700, 7.5662, 7.5536, 7.5357, 7.5269, 7.5223, 7.5138, 7.4562, 7.4484, 7.4371, 7.4334, 7.4294, 7.4257, 7.4143, 7.4065, 7.2617, 6.8258, -1.6329.

**Bottom Spectrum ( $\text{DMSO}-d_6$ ):**

- Chemical shift range: 7.4 to 8.4 ppm.
- Integration values: 2.00, 1.00, 1.00, 1.00, 1.00.
- Peak list (ppm): 7.9384, 7.9345, 7.9309, 7.9244, 7.9197, 7.9144, 7.8865, 7.8808, 7.8681, 7.8604, 7.8090, 7.5976, 7.5852, 7.5748, 7.5700, 7.5662, 7.5536, 7.5357, 7.5269, 7.5223, 7.5138, 7.4562, 7.4484, 7.4371, 7.4334, 7.4294, 7.4257, 7.4143, 7.4065, 7.2617, 6.8258, -1.6329.

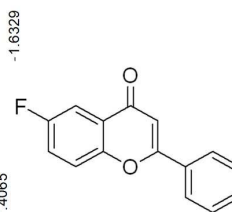

|    | Parameter               | Value                                              |
|----|-------------------------|----------------------------------------------------|
| 1  | Data File Name          | E:/ hwx 400/ 2021-2-                               |
| 2  | Title                   | hwx-H/ 117/ fid                                    |
| 3  | Comment                 | 2021-2-hwx-H.117.fid                               |
| 4  | Origin                  | Bruker BioSpin GmbH                                |
| 5  | Owner                   | nmrsu                                              |
| 6  | Site                    |                                                    |
| 7  | Instrument              | Avance                                             |
| 8  | Author                  |                                                    |
| 9  | Solvent                 | CDCl3                                              |
| 10 | Temperature             | 294.7                                              |
| 11 | Pulse Sequence          | zg30                                               |
| 12 | Experiment              | 1D                                                 |
| 13 | Probe                   | Z116098_0916 (PA<br>BBO 400S1 BBF-H-<br>D-05 Z SP) |
| 14 | Number of Scans         | 4                                                  |
| 15 | Receiver Gain           | 101.0                                              |
| 16 | Relaxation Delay        | 1.0000                                             |
| 17 | Pulse Width             | 10.0000                                            |
| 18 | Presaturation Frequency |                                                    |
| 19 | Acquisition Time        | 3.9977                                             |
| 20 | Acquisition Date        | 2021-10-29T20:30:4                                 |
| 21 | Modification Date       | 2021-10-29T20:30:4                                 |
| 22 | Class                   |                                                    |
| 23 | Spectrometer Frequency  | 400.13                                             |
| 24 | Spectral Width          | 8196.7                                             |
| 25 | Lowest Frequency        | -1637.2                                            |
| 26 | Nucleus                 | 1H                                                 |
| 27 | Acquired Size           | 32768                                              |
| 28 | Spectral Size           | 65536                                              |

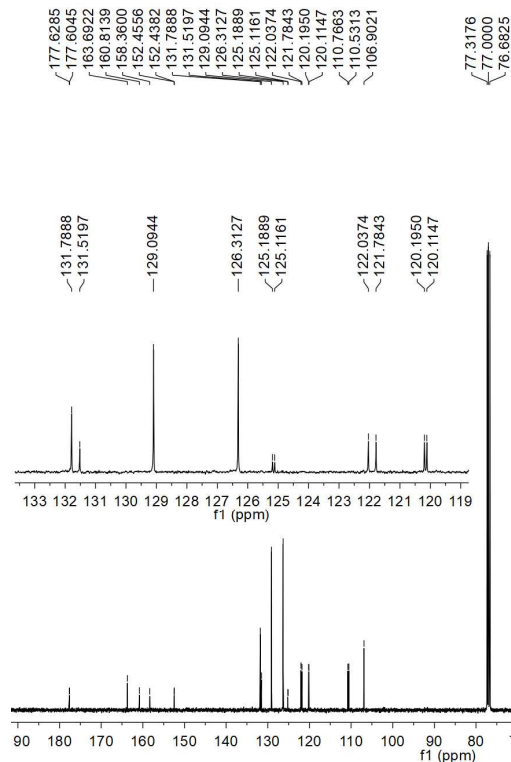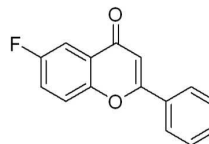

|    | Parameter                   | Value                                               |
|----|-----------------------------|-----------------------------------------------------|
| 1  | Data File Name              | E:/ hwx 400/<br>2021-2-hwx-C/<br>46/ fid            |
| 2  | Title                       | 2021-2-hwx-C-<br>46.fid                             |
| 3  | Comment                     |                                                     |
| 4  | Origin                      | Bruker BioSpin<br>GmbH                              |
| 5  | Owner                       | nmrsl                                               |
| 6  | Site                        |                                                     |
| 7  | Instrument                  | Avance                                              |
| 8  | Author                      |                                                     |
| 9  | Solvent                     | CDCl3                                               |
| 10 | Temperature                 | 296.3                                               |
| 11 | Pulse Sequence              | zgpg30                                              |
| 12 | Experiment                  | 1d                                                  |
| 13 | Probe                       | Z116098_0916<br>(PA BBO 400S<br>BBO-H-D-05 Z<br>SP) |
| 14 | Number of<br>Scans          | 800                                                 |
| 15 | Receiver Gain               | 101.0                                               |
| 16 | Relaxation Delay            | 2.0000                                              |
| 17 | Pulse Width                 | 10.0000                                             |
| 18 | Pretsaturation<br>Frequency |                                                     |
| 19 | Acquisition Time            | 1.3763                                              |
| 20 | Acquisition Date            | 2021-11-12T04:<br>17.25                             |
| 21 | Modification<br>Date        | 2021-11-12T04:<br>16.10                             |
| 22 | Class                       |                                                     |
| 23 | Spectrometer<br>Frequency   | 100.62                                              |
| 24 | Spectral Width              | 23809.5                                             |
| 25 | Lowest<br>Frequency         | -1846.6                                             |
| 26 | Nucleus                     | 13C                                                 |
| 27 | Acquired Size               | 32768                                               |
| 28 | Spectral Size               | 65536                                               |

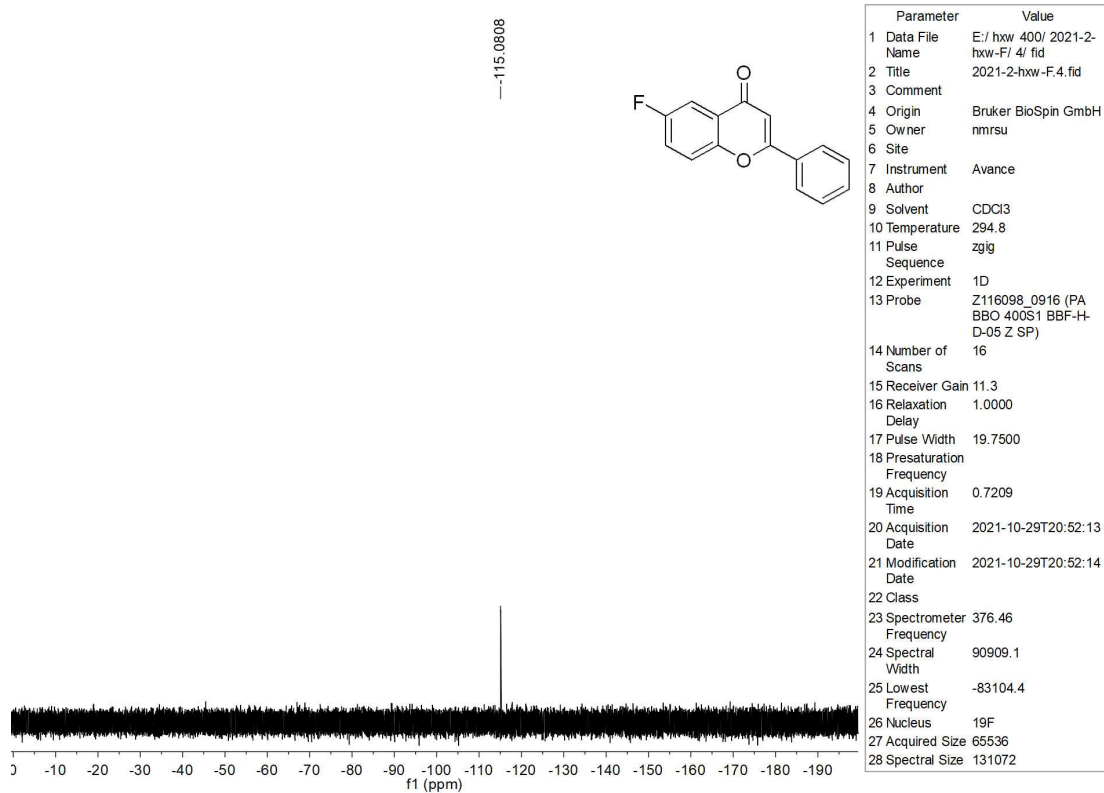

# 6-Chloro-2-phenyl-4H-chromen-4-one (2ea)

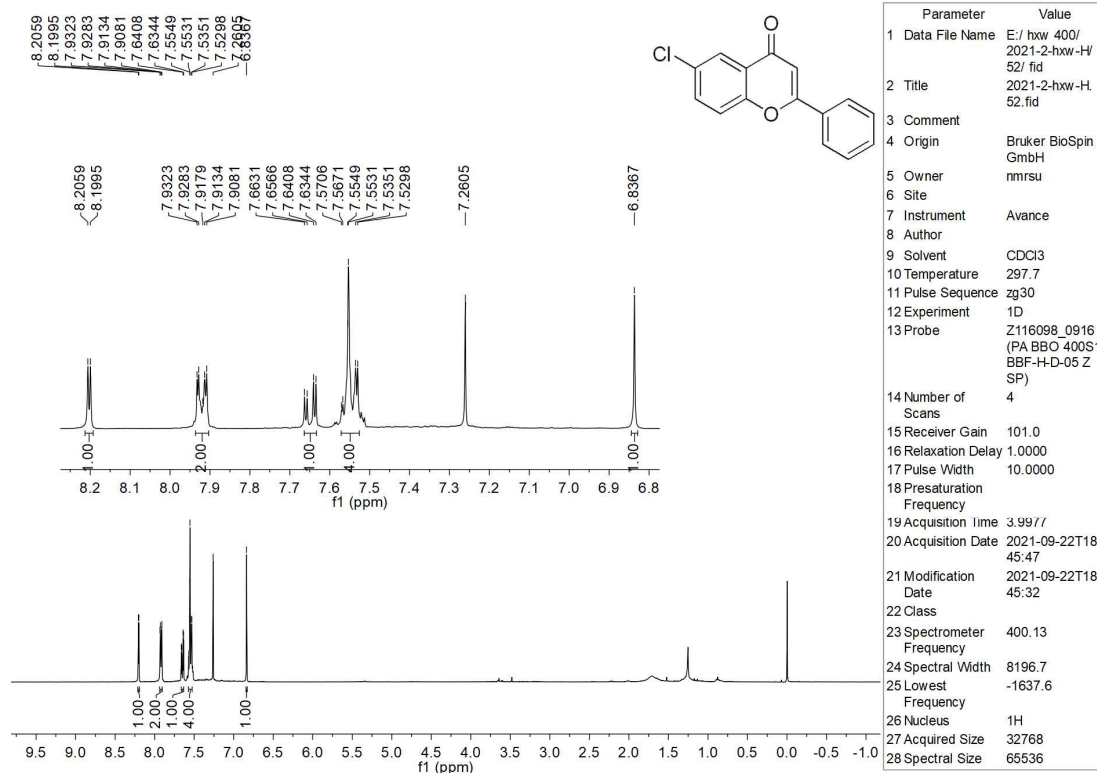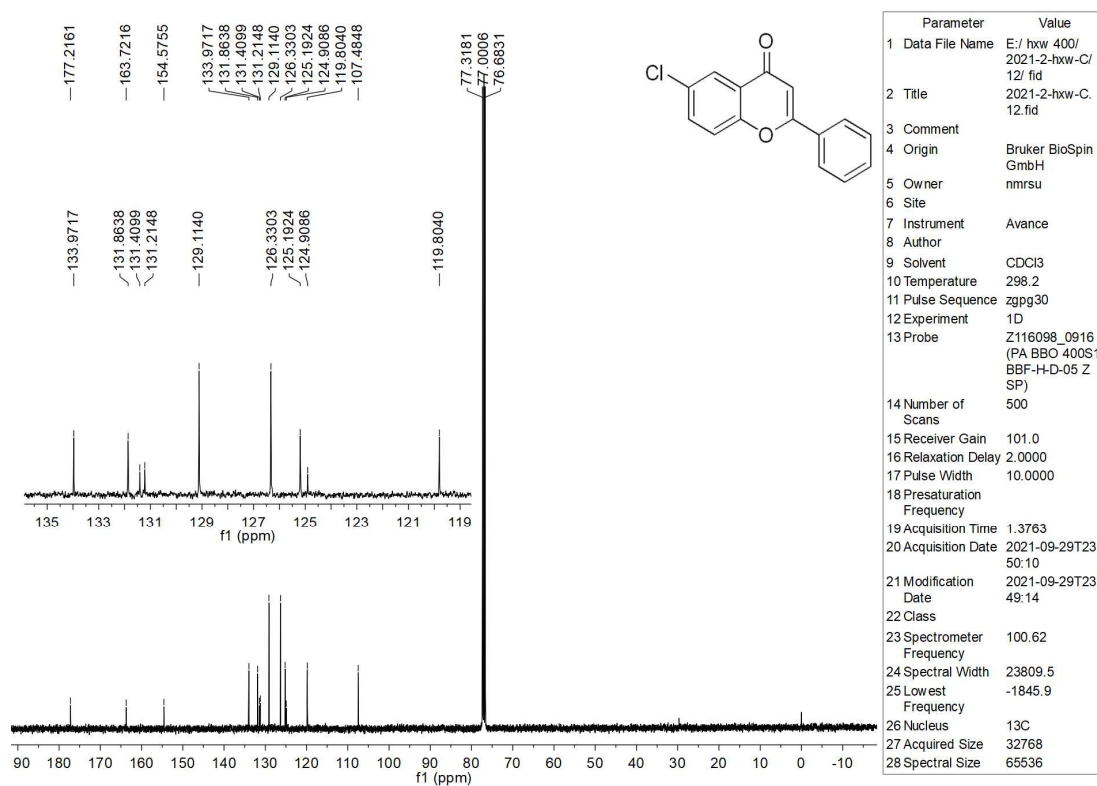



# 6-Bromo-2-phenyl-4*H*-chromen-4-one (2fa)

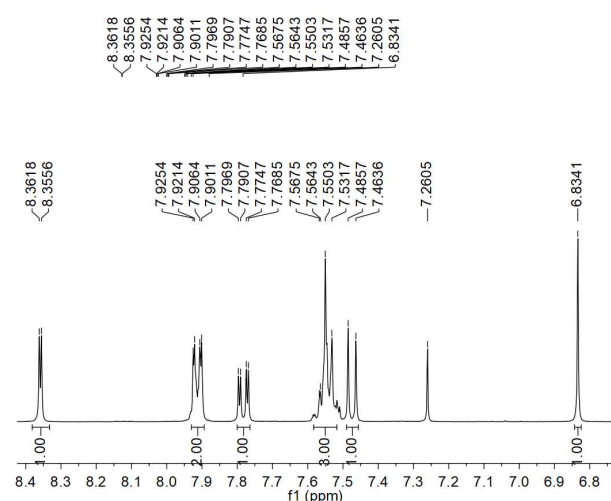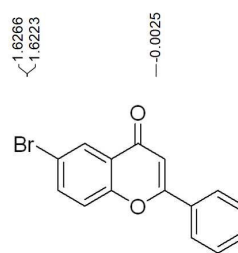

| Parameter                  | Value                                       |
|----------------------------|---------------------------------------------|
| 1 Data File Name           | E:/ hwx 400/ 2021-2-hwx-H/ 101/ fid         |
| 2 Title                    | 2021-2-hwx-H- 101.fid                       |
| 3 Comment                  |                                             |
| 4 Origin                   | Bruker BioSpin GmbH                         |
| 5 Owner                    | nmrsu                                       |
| 6 Site                     |                                             |
| 7 Instrument               | Avance                                      |
| 8 Author                   |                                             |
| 9 Solvent                  | CDCl3                                       |
| 10 Temperature             | 297.8                                       |
| 11 Pulse Sequence          | zg30                                        |
| 12 Experiment              | 1D                                          |
| 13 Probe                   | Z116098_0916 (PA BBO 400S1 BBF-H-D-05 Z SP) |
| 14 Number of Scans         | 4                                           |
| 15 Receiver Gain           | 101.0                                       |
| 16 Relaxation Delay        | 1.0000                                      |
| 17 Pulse Width             | 10.0000                                     |
| 18 Presaturation Frequency |                                             |
| 19 Acquisition Time        | 3.9977                                      |
| 20 Acquisition Date        | 2021-10-23T10:54:40                         |
| 21 Modification Date       | 2021-10-23T10:53:58                         |
| 22 Class                   |                                             |
| 23 Spectrometer Frequency  | 400.13                                      |
| 24 Spectral Width          | 8196.7                                      |
| 25 Lowest Frequency        | -1637.6                                     |
| 26 Nucleus                 | 1H                                          |
| 27 Acquired Size           | 32768                                       |
| 28 Spectral Size           | 65536                                       |

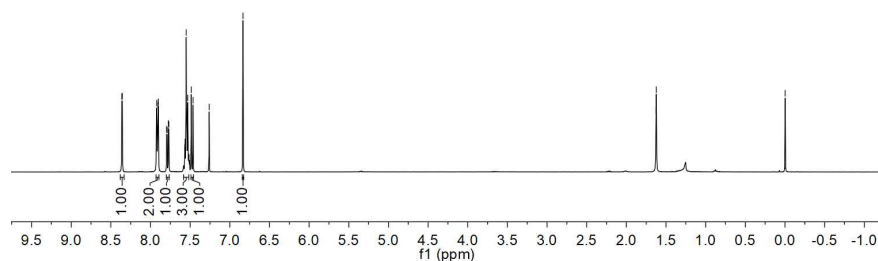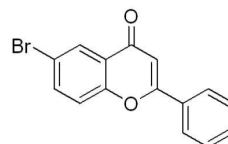

| Parameter                  | Value                                       |
|----------------------------|---------------------------------------------|
| 1 Data File Name           | E:/ hwx 400/ 2021-2-hwx-C/ 36/ fid          |
| 2 Title                    | 2021-2-hwx-C- 36.fid                        |
| 3 Comment                  |                                             |
| 4 Origin                   | Bruker BioSpin GmbH                         |
| 5 Owner                    | nmrsu                                       |
| 6 Site                     |                                             |
| 7 Instrument               | Avance                                      |
| 8 Author                   |                                             |
| 9 Solvent                  | CDCl3                                       |
| 10 Temperature             | 298.7                                       |
| 11 Pulse Sequence          | zgpg30                                      |
| 12 Experiment              | 1D                                          |
| 13 Probe                   | Z116098_0916 (PA BBO 400S1 BBF-H-D-05 Z SP) |
| 14 Number of Scans         | 400                                         |
| 15 Receiver Gain           | 101.0                                       |
| 16 Relaxation Delay        | 2.0000                                      |
| 17 Pulse Width             | 10.0000                                     |
| 18 Presaturation Frequency |                                             |
| 19 Acquisition Time        | 1.3763                                      |
| 20 Acquisition Date        | 2021-10-27T03:23:33                         |
| 21 Modification Date       | 2021-10-27T03:22:28                         |
| 22 Class                   |                                             |
| 23 Spectrometer Frequency  | 100.62                                      |
| 24 Spectral Width          | 23809.5                                     |
| 25 Lowest Frequency        | -1846.4                                     |
| 26 Nucleus                 | 13C                                         |
| 27 Acquired Size           | 32768                                       |
| 28 Spectral Size           | 65536                                       |

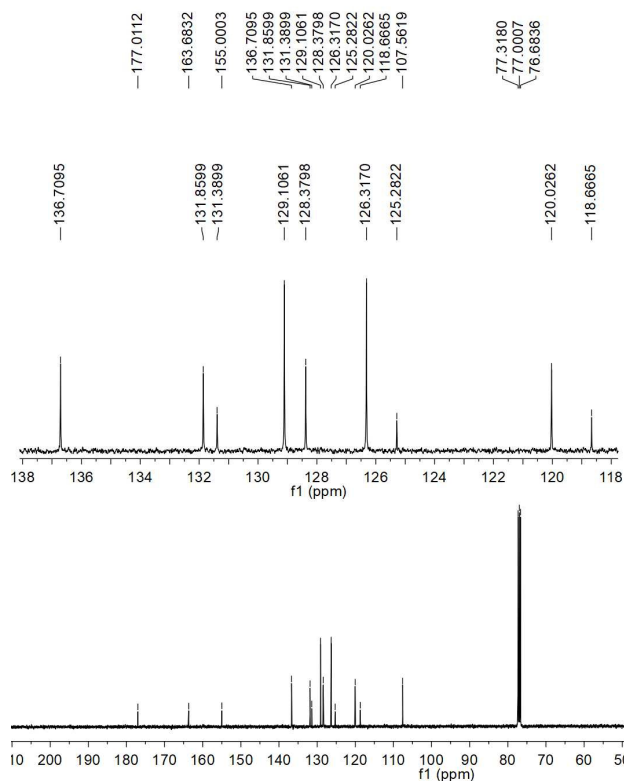

## 6,8-Dichloro-2-phenyl-4H-chromen-4-one (2ga)

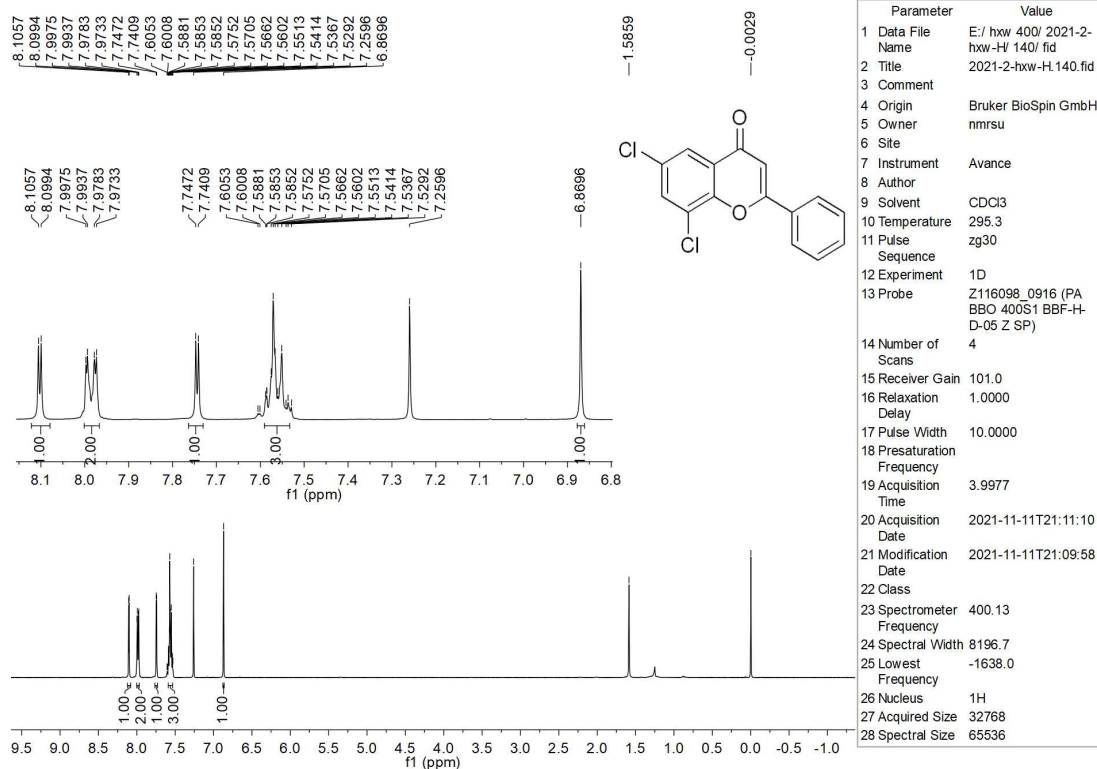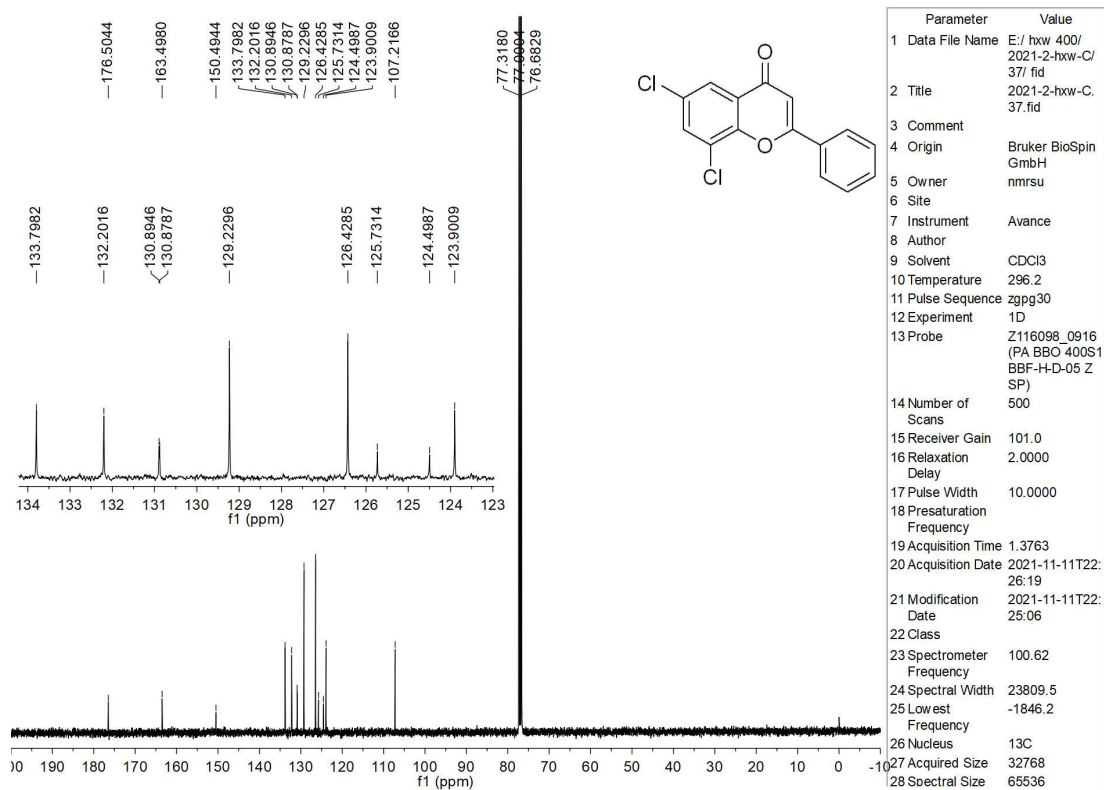



## 6,8-Dibromo-2-phenyl-4H-chromen-4-one (2ha)

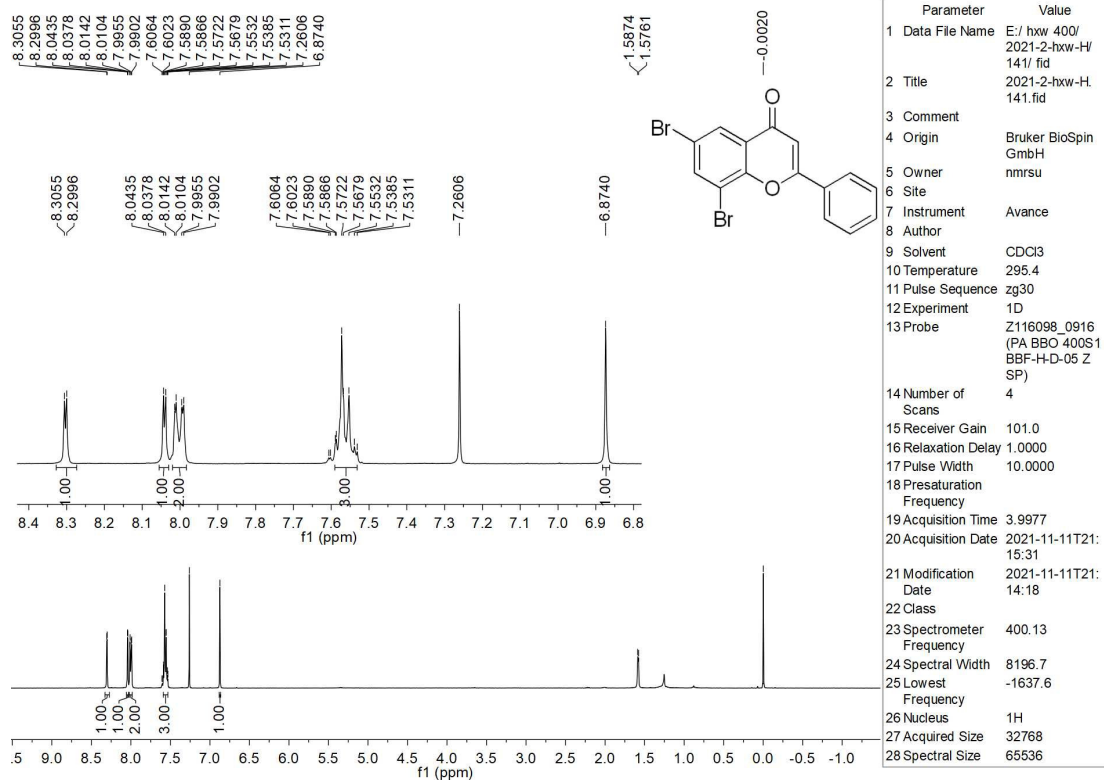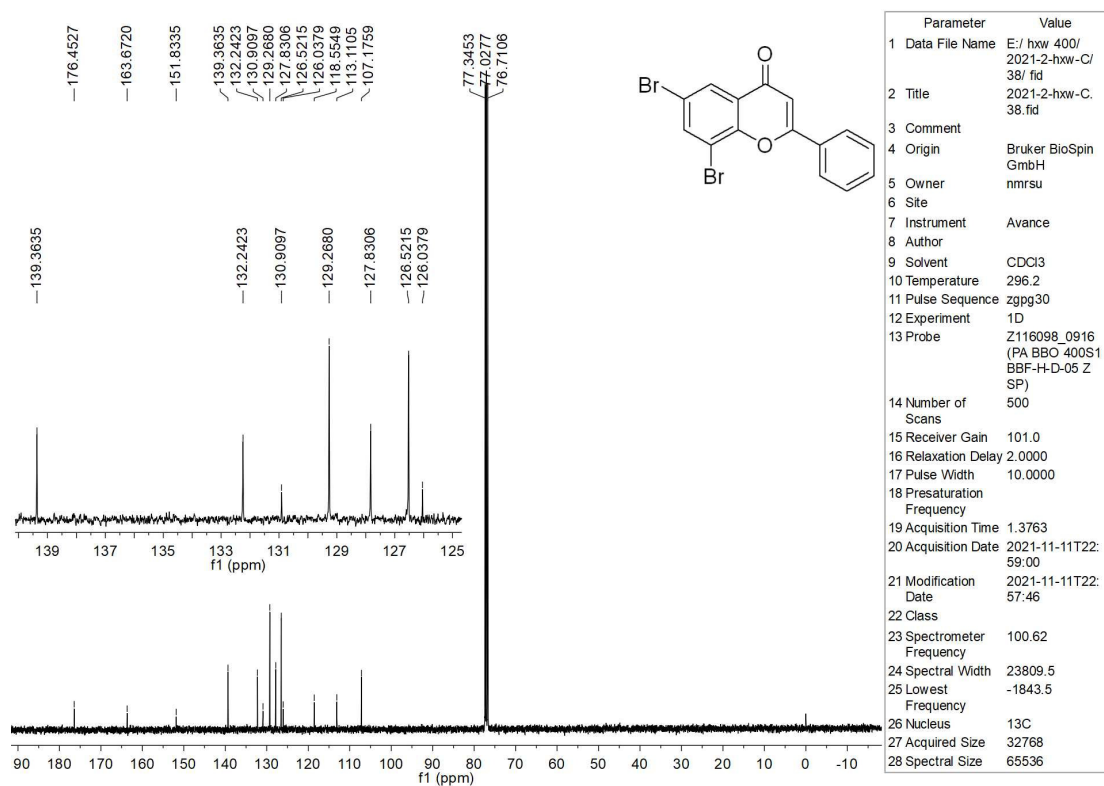

# 6,8-Di-*tert*-butyl-2-phenyl-4*H*-chromen-4-one(2ia)

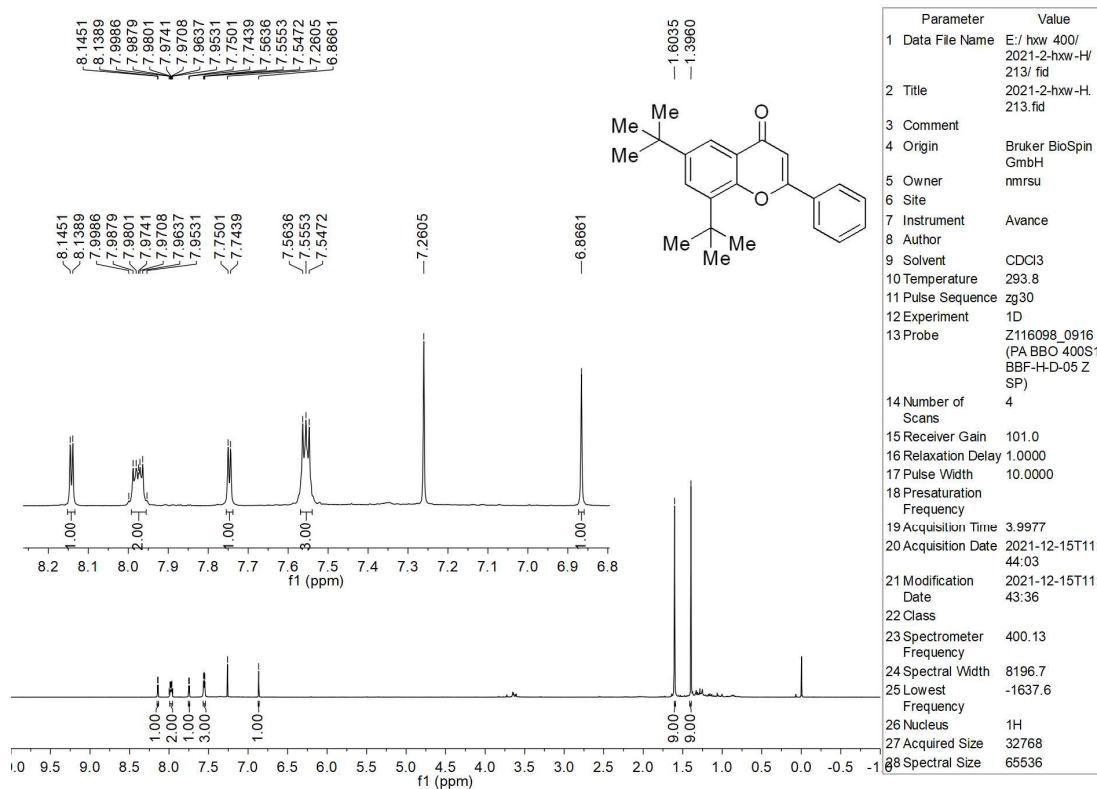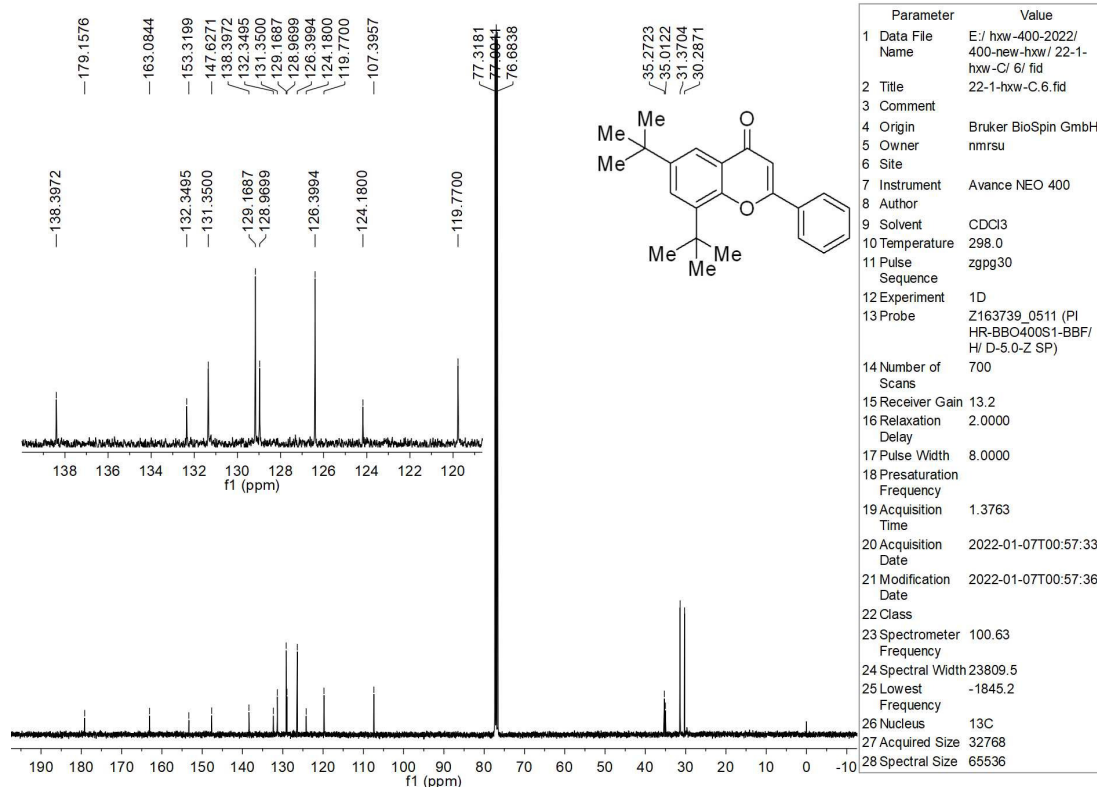

Chemical structure of 2-(4-chlorophenyl)-4-phenyl-2H-chromene is shown in the top right corner of the figure.

The <sup>1</sup>H NMR spectrum (CDCl<sub>3</sub>) shows the following peaks (ppm) and integration values:

| Peak (ppm)                                                                                                             | Integration |
|------------------------------------------------------------------------------------------------------------------------|-------------|
| 7.9288, 7.9216, 7.9176, 7.9133, 7.9111, 7.9077, 7.9029, 7.8975                                                         | 2.00        |
| 7.5623, 7.5541, 7.5473, 7.5398, 7.5350, 7.5290, 7.5081, 7.5047, 7.4871, 7.4836, 7.4156, 7.4120, 7.3965, 7.3929, 7.2604 | 4.00        |
| 7.2604                                                                                                                 | 1.00        |
| 6.7962                                                                                                                 | 1.00        |

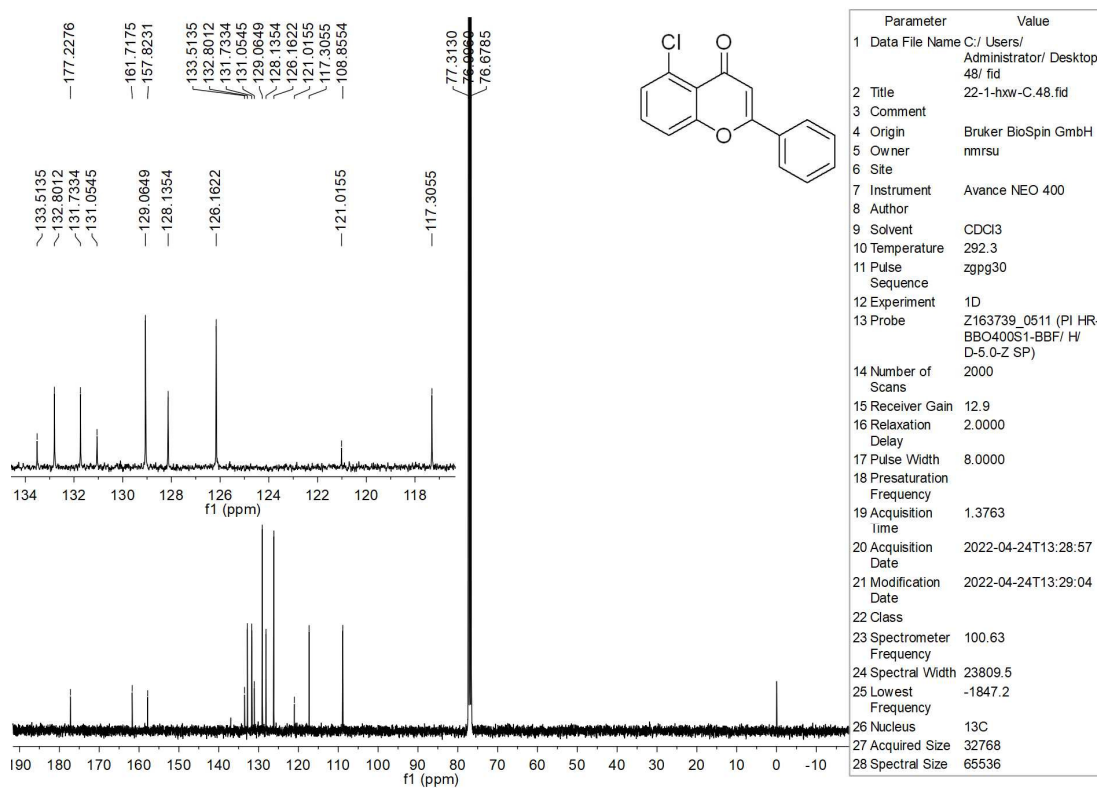

## 7-Chloro-2-phenyl-4H-chromen-4-one (2ka)

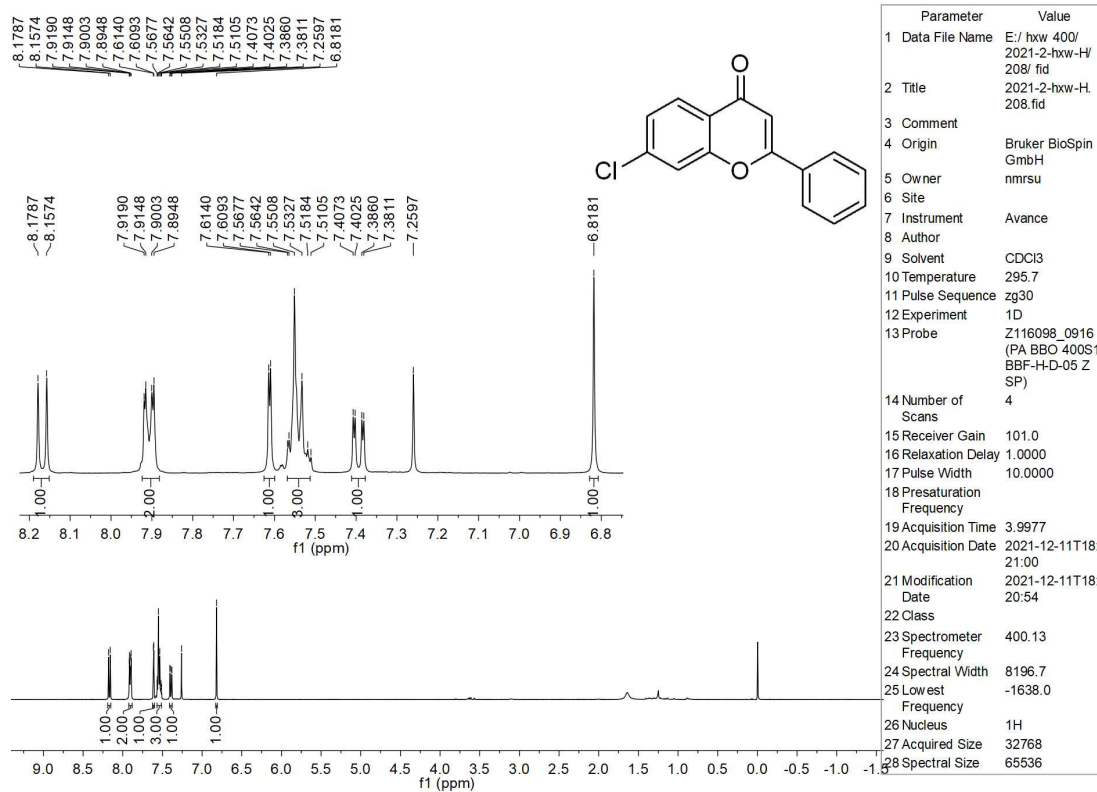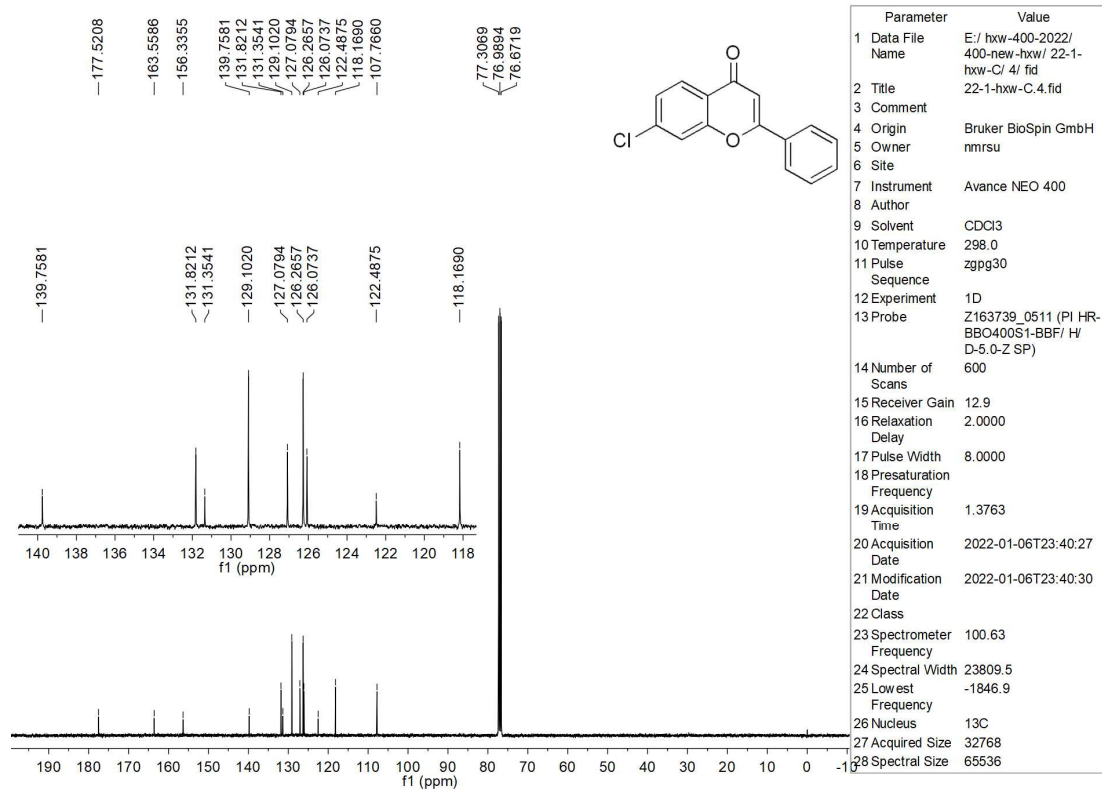

# **8-(*tert*-Butyl)-2-phenyl-4*H*-chromen-4-one(2la)**

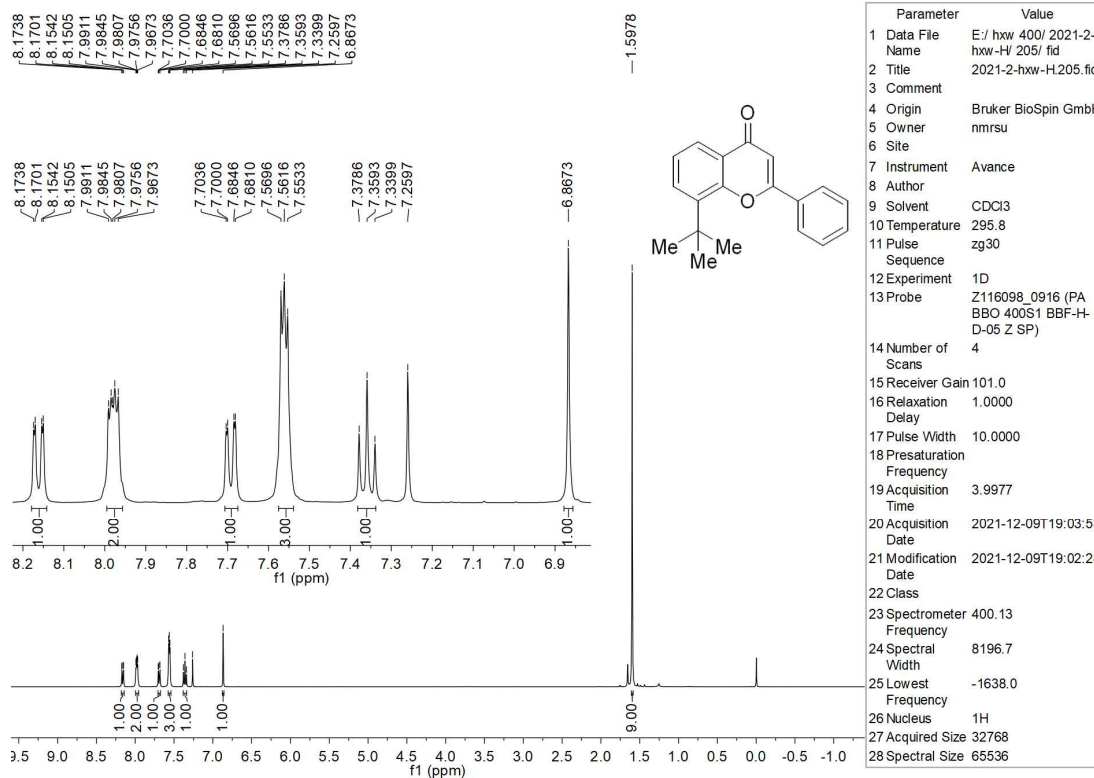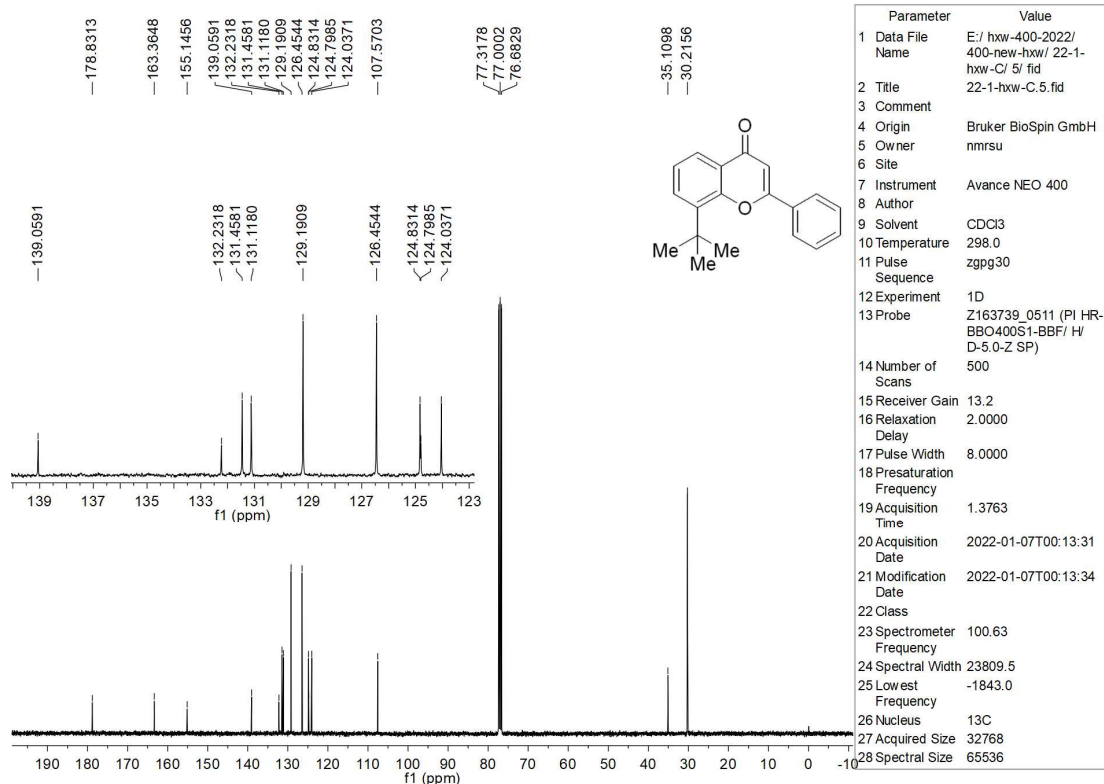



Figure 1 displays the  $^1\text{H}$  NMR spectra of compound **1**. The top spectrum shows the  $^1\text{H}$  NMR in  $\text{CDCl}_3$ , and the bottom spectrum shows the  $^1\text{H}$  NMR in  $\text{DMSO}-d_6$ . The chemical structure of **1** is shown as a benzofuran derivative with a 4-methylphenyl group. The table on the right lists the acquisition parameters.

| Parameter                  | Value                                              |
|----------------------------|----------------------------------------------------|
| 1 Data File Name           | E:/ hww 400/ 2021-1-hxw-HV 98/ fid                 |
| 2 Title                    | 2021-1-hxw-H. 98.fid                               |
| 3 Comment                  |                                                    |
| 4 Origin                   | Bruker BioSpin GmbH                                |
| 5 Owner                    | nmrsu                                              |
| 6 Site                     |                                                    |
| 7 Instrument               | Avance                                             |
| 8 Author                   |                                                    |
| 9 Solvent                  | $\text{CDCl}_3$                                    |
| 10 Temperature             | 298.3                                              |
| 11 Pulse Sequence          | zg30                                               |
| 12 Experiment              | 1D                                                 |
| 13 Probe                   | Z163739_0032 (PI HR-400-S1-BBF) H $^1$ D-5.0-2-SP) |
| 14 Number of Scans         | 4                                                  |
| 15 Receiver Gain           | 101.0                                              |
| 16 Relaxation Delay        | 1.0000                                             |
| 17 Pulse Width             | 10.0000                                            |
| 18 Presaturation Frequency |                                                    |
| 19 Acquisition Time        | 3.9977                                             |
| 20 Acquisition Date        | 2021-06-30T12:11:44                                |
| 21 Modification Date       | 2021-06-30T12:11:18                                |
| 22 Class                   |                                                    |
| 23 Spectrometer Frequency  | 400.13                                             |
| 24 Spectral Width          | 8196.7                                             |
| 25 Lowest Frequency        | -1637.2                                            |
| 26 Nucleus                 | $^1\text{H}$                                       |
| 27 Acquired Size           | 32768                                              |
| 28 Spectral Size           | 65536                                              |

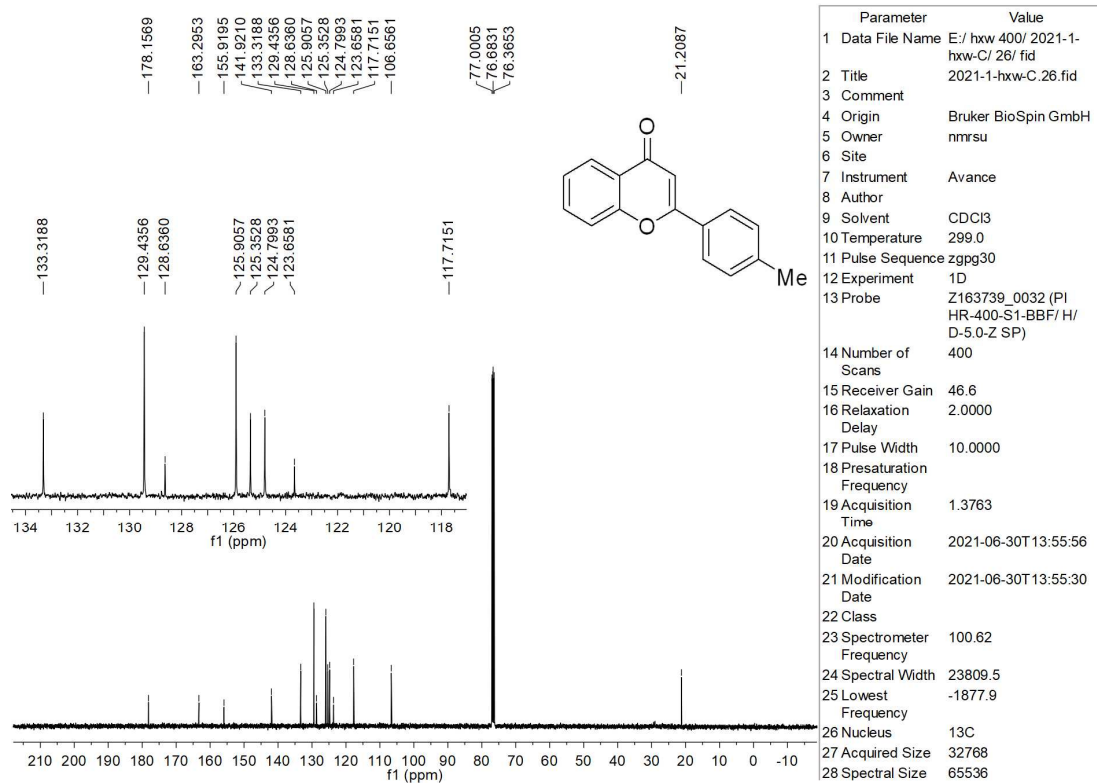

## 2-(4-Methoxyphenyl)-4H-chromen-4-one (2ac)

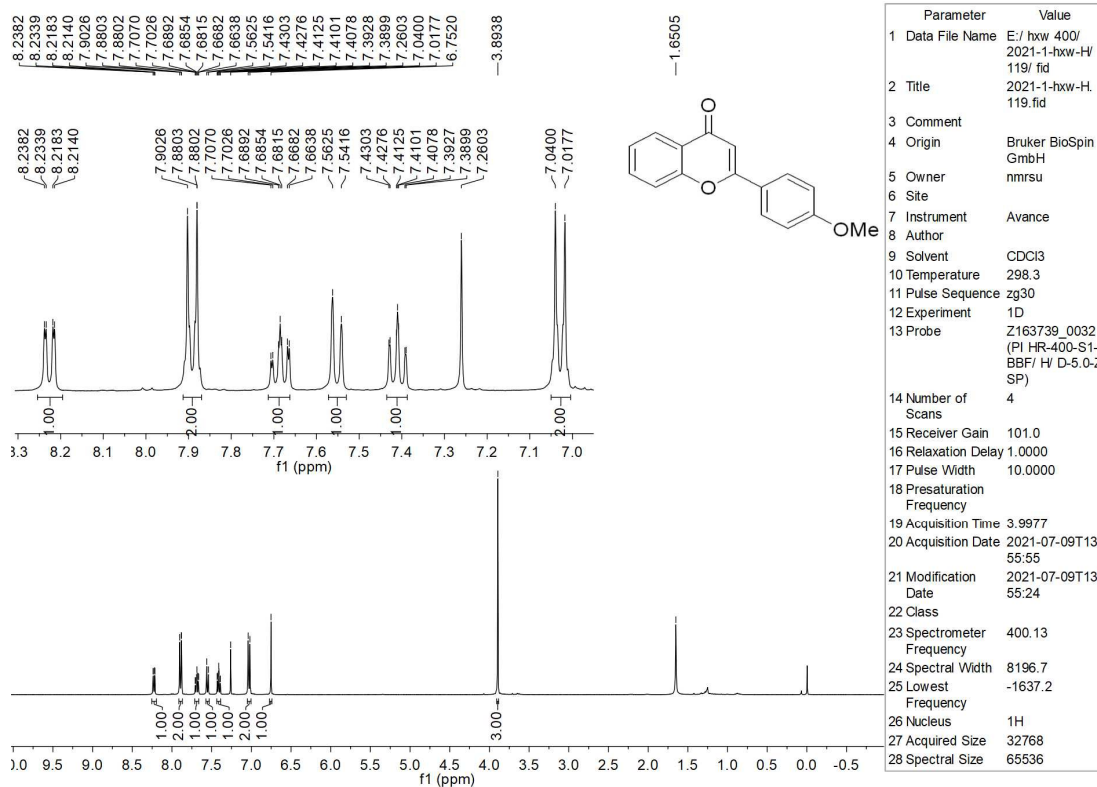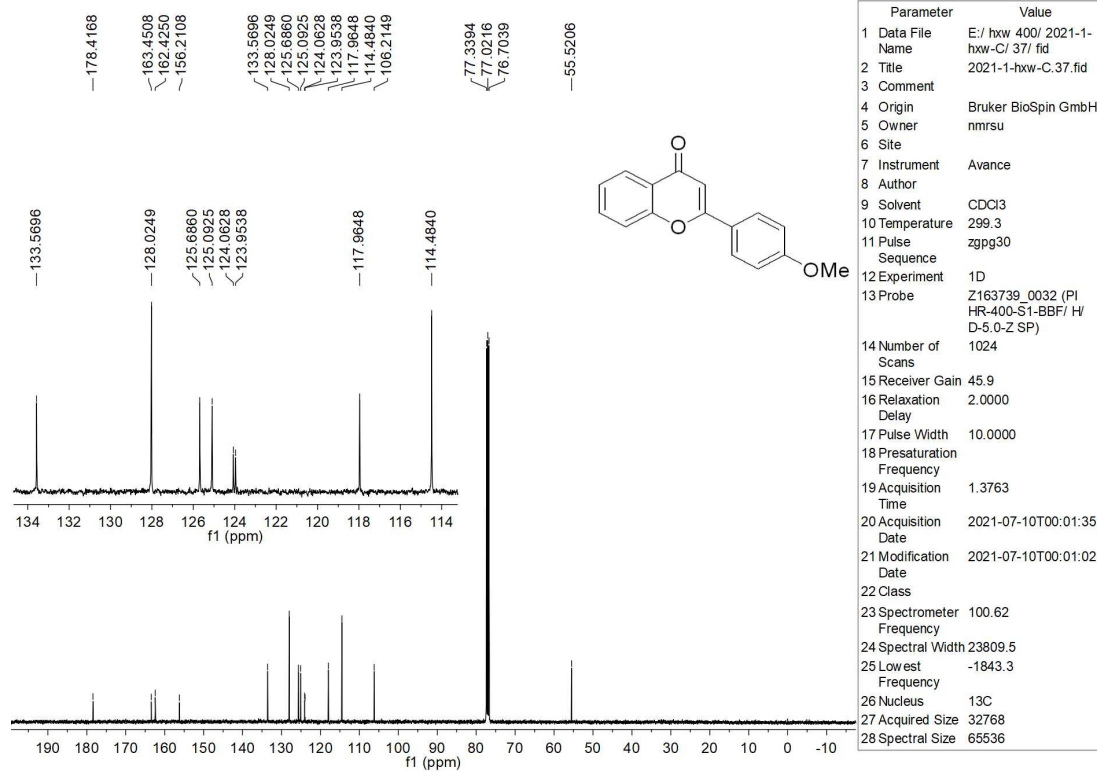

## 2-(4-Fluorophenyl)-4H-chromen-4-one (2ad)

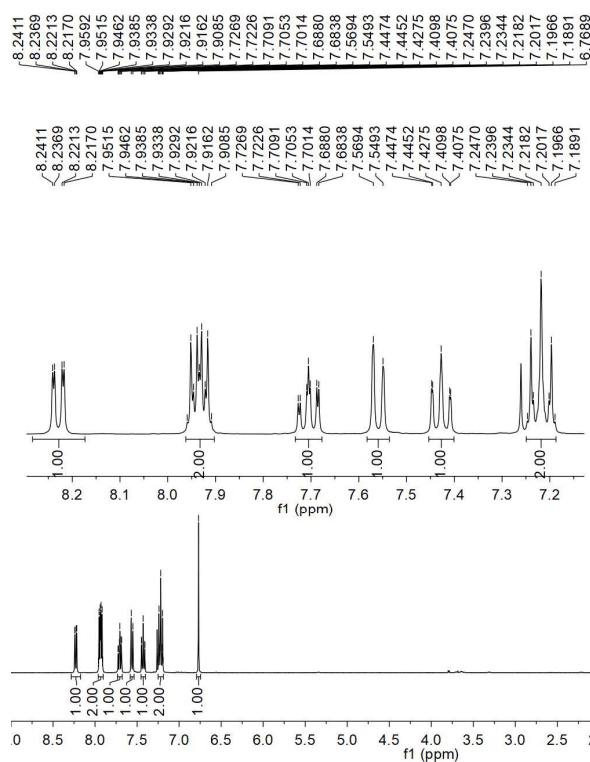

| Parameter                  | Value                                       |
|----------------------------|---------------------------------------------|
| 1 Data File Name           | E:/ hwx 400/ 2021-2-hwx-H/ 100/ fid         |
| 2 Title                    | 2021-2-hwx-H.100.fid                        |
| 3 Comment                  |                                             |
| 4 Origin                   | Bruker BioSpin GmbH                         |
| 5 Owner                    | nmrsu                                       |
| 6 Site                     |                                             |
| 7 Instrument               | Avance                                      |
| 8 Author                   |                                             |
| 9 Solvent                  | CDCl <sub>3</sub>                           |
| 10 Temperature             | 297.8                                       |
| 11 Pulse Sequence          | zg30                                        |
| 12 Experiment              | 1D                                          |
| 13 Probe                   | Z116098_0916 (PA BBO 400S1 BBF-H-D-05 Z SP) |
| 14 Number of Scans         | 4                                           |
| 15 Receiver Gain           | 101.0                                       |
| 16 Relaxation Delay        | 1.0000                                      |
| 17 Pulse Width             | 10.0000                                     |
| 18 Presaturation Frequency |                                             |
| 19 Acquisition Time        | 3.9977                                      |
| 20 Acquisition Date        | 2021-10-23T10:50:57                         |
| 21 Modification Date       | 2021-10-23T10:50:14                         |
| 22 Class                   |                                             |
| 23 Spectrometer Frequency  | 400.13                                      |
| 24 Spectral Width          | 8196.7                                      |
| 25 Lowest Frequency        | -1637.6                                     |
| 26 Nucleus                 | <sup>1</sup> H                              |
| 27 Acquired Size           | 32768                                       |
| 28 Spectral Size           | 65536                                       |

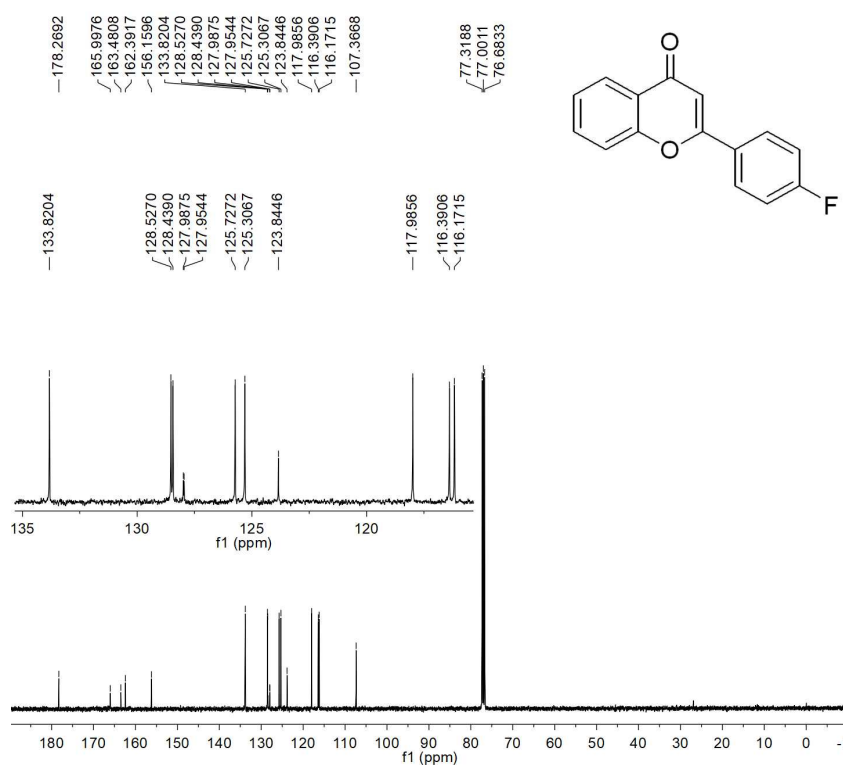

| Parameter                  | Value                                       |
|----------------------------|---------------------------------------------|
| 1 Data File Name           | E:/ hwx 400/ 2021-2-hwx-C/ 33/ fid          |
| 2 Title                    | 2021-2-hwx-C.33.fid                         |
| 3 Comment                  |                                             |
| 4 Origin                   | Bruker BioSpin GmbH                         |
| 5 Owner                    | nmrsu                                       |
| 6 Site                     |                                             |
| 7 Instrument               | Avance                                      |
| 8 Author                   |                                             |
| 9 Solvent                  | CDCl <sub>3</sub>                           |
| 10 Temperature             | 298.8                                       |
| 11 Pulse Sequence          | zgpg30                                      |
| 12 Experiment              | 1D                                          |
| 13 Probe                   | Z116098_0916 (PA BBO 400S1 BBF-H-D-05 Z SP) |
| 14 Number of Scans         | 400                                         |
| 15 Receiver Gain           | 101.0                                       |
| 16 Relaxation Delay        | 2.0000                                      |
| 17 Pulse Width             | 10.0000                                     |
| 18 Presaturation Frequency |                                             |
| 19 Acquisition Time        | 1.3763                                      |
| 20 Acquisition Date        | 2021-10-27T01:55:08                         |
| 21 Modification Date       | 2021-10-27T01:54:04                         |
| 22 Class                   |                                             |
| 23 Spectrometer Frequency  | 100.62                                      |
| 24 Spectral Width          | 23809.5                                     |
| 25 Lowest Frequency        | -1846.8                                     |
| 26 Nucleus                 | <sup>13</sup> C                             |
| 27 Acquired Size           | 32768                                       |
| 28 Spectral Size           | 65536                                       |



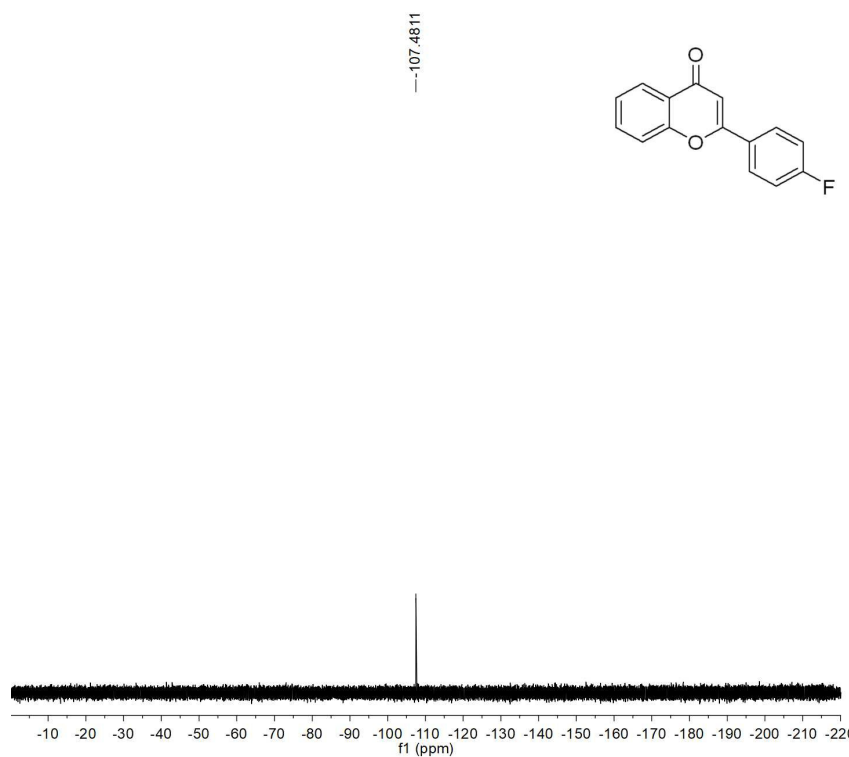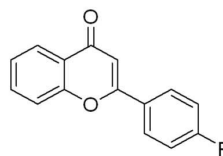

| Parameter                  | Value                                       |
|----------------------------|---------------------------------------------|
| 1 Data File Name           | E:/ hww 400/ 2021-2-hww-F/ 3/ fid           |
| 2 Title                    | 2021-2-hww-F.3.fid                          |
| 3 Comment                  |                                             |
| 4 Origin                   | Bruker BioSpin GmbH                         |
| 5 Owner                    | nmrsu                                       |
| 6 Site                     |                                             |
| 7 Instrument               | Avance                                      |
| 8 Author                   |                                             |
| 9 Solvent                  | CDCl3                                       |
| 10 Temperature             | 298.4                                       |
| 11 Pulse Sequence          | zgig                                        |
| 12 Experiment              | 1D                                          |
| 13 Probe                   | Z116098_0916 (PA BBO 400S1 BBF-H-D-05 Z SP) |
| 14 Number of Scans         | 16                                          |
| 15 Receiver Gain           | 13.1                                        |
| 16 Relaxation Delay        | 1.0000                                      |
| 17 Pulse Width             | 19.7500                                     |
| 18 Presaturation Frequency |                                             |
| 19 Acquisition Time        | 0.7209                                      |
| 20 Acquisition Date        | 2021-10-27T01:30:39                         |
| 21 Modification Date       | 2021-10-27T01:29:36                         |
| 22 Class                   |                                             |
| 23 Spectrometer Frequency  | 376.46                                      |
| 24 Spectral Width          | 90909.1                                     |
| 25 Lowest Frequency        | -83104.4                                    |
| 26 Nucleus                 | 19F                                         |
| 27 Acquired Size           | 65536                                       |
| 28 Spectral Size           | 131072                                      |

## 2-(4-Chlorophenyl)-4H-chromen-4-one (2ae)

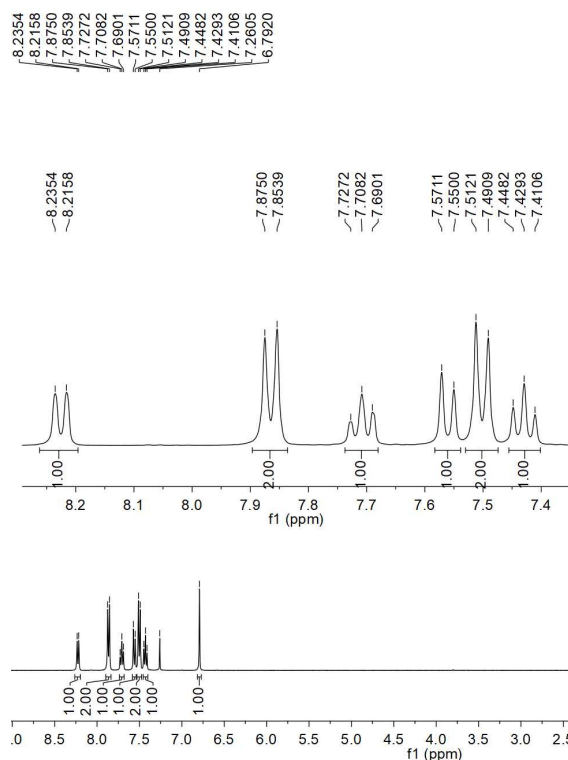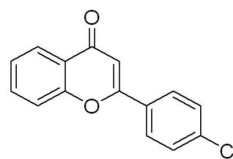

| Parameter                  | Value                                       |
|----------------------------|---------------------------------------------|
| 1 Data File Name           | E:/ hwx 400/ 2021-2-hwx-H-69.fid            |
| 2 Title                    | 2021-2-hwx-H-69.fid                         |
| 3 Comment                  |                                             |
| 4 Origin                   | Bruker BioSpin GmbH                         |
| 5 Owner                    | nmrsu                                       |
| 6 Site                     |                                             |
| 7 Instrument               | Avance                                      |
| 8 Author                   |                                             |
| 9 Solvent                  | CDCl <sub>3</sub>                           |
| 10 Temperature             | 297.6                                       |
| 11 Pulse Sequence          | zg30                                        |
| 12 Experiment              | 1D                                          |
| 13 Probe                   | Z116098_0916 (PA BBO 400S1 BBF-H-D-05 Z SP) |
| 14 Number of Scans         | 4                                           |
| 15 Receiver Gain           | 101.0                                       |
| 16 Relaxation Delay        | 1.0000                                      |
| 17 Pulse Width             | 10.0000                                     |
| 18 Presaturation Frequency |                                             |
| 19 Acquisition Time        | 3.9977                                      |
| 20 Acquisition Date        | 2021-10-11T19:03:46                         |
| 21 Modification Date       | 2021-10-11T19:01:42                         |
| 22 Class                   |                                             |
| 23 Spectrometer Frequency  | 400.13                                      |
| 24 Spectral Width          | 8196.7                                      |
| 25 Lowest Frequency        | -1637.6                                     |
| 26 Nucleus                 | <sup>1</sup> H                              |
| 27 Acquired Size           | 32768                                       |
| 28 Spectral Size           | 65536                                       |

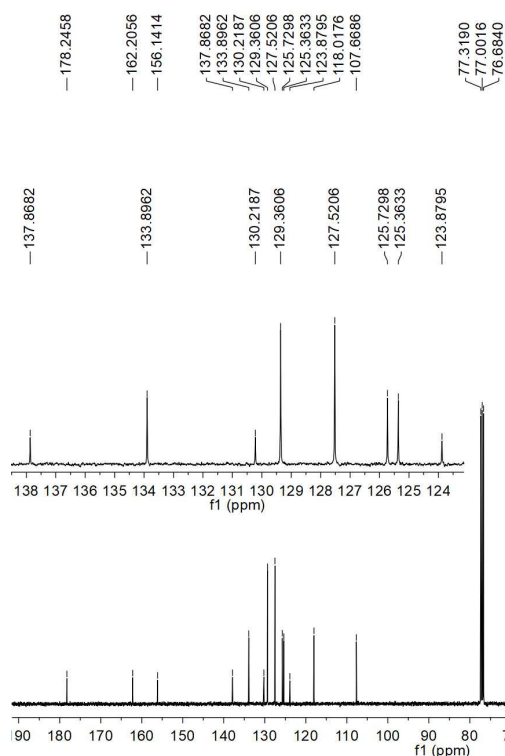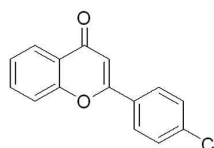

| Parameter                  | Value                                       |
|----------------------------|---------------------------------------------|
| 1 Data File Name           | E:/ hwx 400/ 2021-2-hwx-C/ 19.fid           |
| 2 Title                    | 2021-2-hwx-C-19.fid                         |
| 3 Comment                  |                                             |
| 4 Origin                   | Bruker BioSpin GmbH                         |
| 5 Owner                    | nmrsu                                       |
| 6 Site                     |                                             |
| 7 Instrument               | Avance                                      |
| 8 Author                   |                                             |
| 9 Solvent                  | CDCl <sub>3</sub>                           |
| 10 Temperature             | 298.2                                       |
| 11 Pulse Sequence          | zgpg30                                      |
| 12 Experiment              | 1D                                          |
| 13 Probe                   | Z116098_0916 (PA BBO 400S1 BBF-H-D-05 Z SP) |
| 14 Number of Scans         | 400                                         |
| 15 Receiver Gain           | 101.0                                       |
| 16 Relaxation Delay        | 2.0000                                      |
| 17 Pulse Width             | 10.0000                                     |
| 18 Presaturation Frequency |                                             |
| 19 Acquisition Time        | 1.3763                                      |
| 20 Acquisition Date        | 2021-10-11T22:49:58                         |
| 21 Modification Date       | 2021-10-11T22:47:54                         |
| 22 Class                   |                                             |
| 23 Spectrometer Frequency  | 100.62                                      |
| 24 Spectral Width          | 23809.5                                     |
| 25 Lowest Frequency        | -1847.1                                     |
| 26 Nucleus                 | <sup>13</sup> C                             |
| 27 Acquired Size           | 32768                                       |
| 28 Spectral Size           | 65536                                       |

## 2-(4-Bromophenyl)-4H-chromen-4-one (2af)

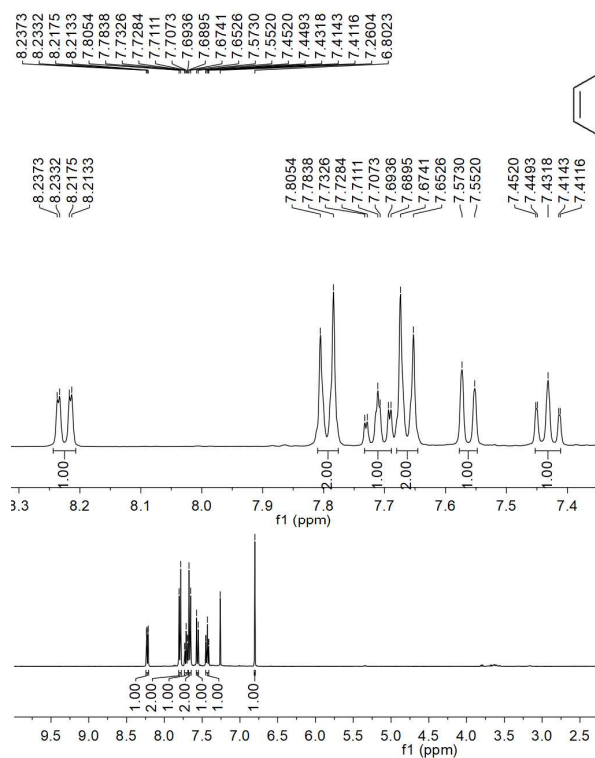

| Parameter                  | Value                                          |
|----------------------------|------------------------------------------------|
| 1 Data File Name           | E:/ hwx 400/ 2021-2-hwx-H/ 27/ fid             |
| 2 Title                    | 2021-2-hwx-H.27.fid                            |
| 3 Comment                  |                                                |
| 4 Origin                   | Bruker BioSpin GmbH                            |
| 5 Owner                    | nmrsu                                          |
| 6 Site                     |                                                |
| 7 Instrument               | Avance                                         |
| 8 Author                   |                                                |
| 9 Solvent                  | CDCl <sub>3</sub>                              |
| 10 Temperature             | 297.0                                          |
| 11 Pulse Sequence          | zg30                                           |
| 12 Experiment              | 1D                                             |
| 13 Probe                   | Z163739_0032 (PI HR-400-S1-BBF/ H/ D-5.0-Z SP) |
| 14 Number of Scans         | 4                                              |
| 15 Receiver Gain           | 101.0                                          |
| 16 Relaxation Delay        | 1.0000                                         |
| 17 Pulse Width             | 10.0000                                        |
| 18 Presaturation Frequency |                                                |
| 19 Acquisition Time        | 3.9977                                         |
| 20 Acquisition Date        | 2021-08-21T11:18:06                            |
| 21 Modification Date       | 2021-08-21T11:17:34                            |
| 22 Class                   |                                                |
| 23 Spectrometer Frequency  | 400.13                                         |
| 24 Spectral Width          | 8196.7                                         |
| 25 Lowest Frequency        | -1637.2                                        |
| 26 Nucleus                 | <sup>1</sup> H                                 |
| 27 Acquired Size           | 32768                                          |
| 28 Spectral Size           | 65536                                          |

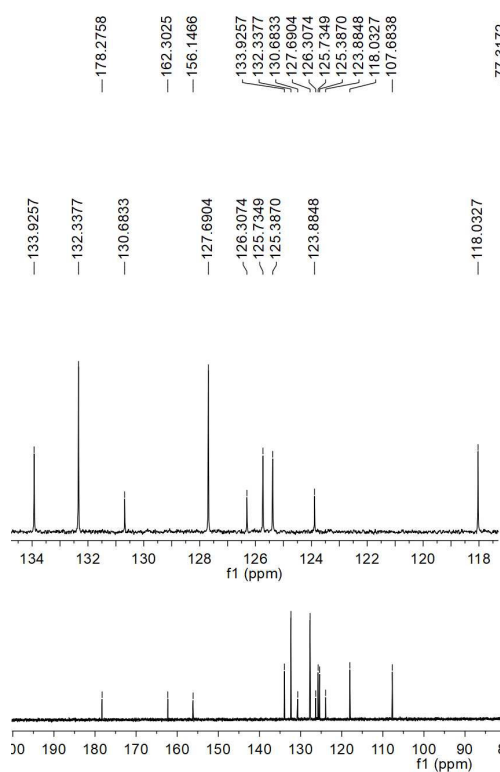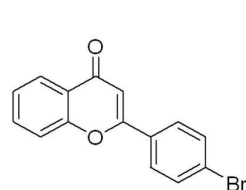

| Parameter                  | Value                                          |
|----------------------------|------------------------------------------------|
| 1 Data File Name           | E:/ hwx 400/ 2021-2-hwx-C/ 7/ fid              |
| 2 Title                    | 2021-2-hwx-C.7.fid                             |
| 3 Comment                  |                                                |
| 4 Origin                   | Bruker BioSpin GmbH                            |
| 5 Owner                    | nmrsu                                          |
| 6 Site                     |                                                |
| 7 Instrument               | Avance                                         |
| 8 Author                   |                                                |
| 9 Solvent                  | CDCl <sub>3</sub>                              |
| 10 Temperature             | 297.6                                          |
| 11 Pulse Sequence          | zgpg30                                         |
| 12 Experiment              | 1D                                             |
| 13 Probe                   | Z163739_0032 (PI HR-400-S1-BBF/ H/ D-5.0-Z SP) |
| 14 Number of Scans         | 500                                            |
| 15 Receiver Gain           | 49.5                                           |
| 16 Relaxation Delay        | 2.0000                                         |
| 17 Pulse Width             | 10.0000                                        |
| 18 Presaturation Frequency |                                                |
| 19 Acquisition Time        | 1.3763                                         |
| 20 Acquisition Date        | 2021-08-21T11:59:01                            |
| 21 Modification Date       | 2021-08-21T11:58:28                            |
| 22 Class                   |                                                |
| 23 Spectrometer Frequency  | 100.62                                         |
| 24 Spectral Width          | 23809.5                                        |
| 25 Lowest Frequency        | -1846.7                                        |
| 26 Nucleus                 | <sup>13</sup> C                                |
| 27 Acquired Size           | 32768                                          |
| 28 Spectral Size           | 65536                                          |

**<sup>1</sup>H NMR spectrum (CDCl<sub>3</sub>) of 2-(2-fluorophenyl)-2H-chromene.**

**Chemical structure:** O=C1C(=C(C2=CC=CC=C2F)OC3=CC=CC=C13)C4=CC=CC=C4

**Peak list (ppm):** 8.2512, 8.2470, 8.2434, 8.2314, 8.2270, 8.2270, 7.9578, 7.9533, 7.9385, 7.9341, 7.9194, 7.9148, 7.7117, 7.7078, 7.7039, 7.6905, 7.7117, 7.7078, 7.7039, 7.6905, 7.5886, 7.5392, 7.5267, 7.5067, 7.4526, 7.4326, 7.4149, 7.4126, 7.3472, 7.3447, 7.3277, 7.3259, 7.3090, 7.3065, 7.2802, 7.2376, 7.2352, 7.2298, 7.2275, 7.2090, 7.2067, 2.472, 2.468, 2.464, 2.460, 2.456, 2.452, 2.448, 2.444, 2.440, 2.436, 2.432, 2.428, 2.424, 2.420, 2.416, 2.412, 2.408, 2.404, 2.400, 2.396, 2.392, 2.388, 2.384, 2.380, 2.376, 2.372, 2.368, 2.364, 2.360, 2.356, 2.352, 2.348, 2.344, 2.340, 2.336, 2.332, 2.328, 2.324, 2.320, 2.316, 2.312, 2.308, 2.304, 2.300, 2.296, 2.292, 2.288, 2.284, 2.280, 2.276, 2.272, 2.268, 2.264, 2.260, 2.256, 2.252, 2.248, 2.244, 2.240, 2.236, 2.232, 2.228, 2.224, 2.220, 2.216, 2.212, 2.208, 2.204, 2.200, 2.196, 2.192, 2.188, 2.184, 2.180, 2.176, 2.172, 2.168, 2.164, 2.160, 2.156, 2.152, 2.148, 2.144, 2.140, 2.136, 2.132, 2.128, 2.124, 2.120, 2.116, 2.112, 2.108, 2.104, 2.100, 2.096, 2.092, 2.088, 2.084, 2.080, 2.076, 2.072, 2.068, 2.064, 2.060, 2.056, 2.052, 2.048, 2.044, 2.040, 2.036, 2.032, 2.028, 2.024, 2.020, 2.016, 2.012, 2.008, 2.004, 2.000, 1.996, 1.992, 1.988, 1.984, 1.980, 1.976, 1.972, 1.968, 1.964, 1.960, 1.956, 1.952, 1.948, 1.944, 1.940, 1.936, 1.932, 1.928, 1.924, 1.920, 1.916, 1.912, 1.908, 1.904, 1.900, 1.896, 1.892, 1.888, 1.884, 1.880, 1.876, 1.872, 1.868, 1.864, 1.860, 1.856, 1.852, 1.848, 1.844, 1.840, 1.836, 1.832, 1.828, 1.824, 1.820, 1.816, 1.812, 1.808, 1.804, 1.800, 1.796, 1.792, 1.788, 1.784, 1.780, 1.776, 1.772, 1.768, 1.764, 1.760, 1.756, 1.752, 1.748, 1.744, 1.740, 1.736, 1.732, 1.728, 1.724, 1.720, 1.716, 1.712, 1.708, 1.704, 1.700, 1.696, 1.692, 1.688, 1.684, 1.680, 1.676, 1.672, 1.668, 1.664, 1.660, 1.656, 1.652, 1.648, 1.644, 1.640, 1.636, 1.632, 1.628, 1.624, 1.620, 1.616, 1.612, 1.608, 1.604, 1.600, 1.596, 1.592, 1.588, 1.584, 1.580, 1.576, 1.572, 1.568, 1.564, 1.560, 1.556, 1.552, 1.548, 1.544, 1.540, 1.536, 1.532, 1.528, 1.524, 1.520, 1.516, 1.512, 1.508, 1.504, 1.500, 1.496, 1.492, 1.488, 1.484, 1.480, 1.476, 1.472, 1.468, 1.464, 1.460, 1.456, 1.452, 1.448, 1.444, 1.440, 1.436, 1.432, 1.428, 1.424, 1.420, 1.416, 1.412, 1.408, 1.404, 1.400, 1.396, 1.392, 1.388, 1.384, 1.380, 1.376, 1.372, 1.368, 1.364, 1.360, 1.356, 1.352, 1.348, 1.344, 1.340, 1.336, 1.332, 1.328, 1.324, 1.320, 1.316, 1.312, 1.308, 1.304, 1.300, 1.296, 1.292, 1.288, 1.284, 1.280, 1.276, 1.272, 1.268, 1.264, 1.260, 1.256, 1.252, 1.248, 1.244, 1.240, 1.236, 1.232, 1.228, 1.224, 1.220, 1.216, 1.212, 1.208, 1.204, 1.200, 1.196, 1.192, 1.188, 1.184, 1.180, 1.176, 1.172, 1.168, 1.164, 1.160, 1.156, 1.152, 1.148, 1.144, 1.140, 1.136, 1.132, 1.128, 1.124, 1.120, 1.116, 1.112, 1.108, 1.104, 1.100, 1.096, 1.092, 1.088, 1.084, 1.080, 1.076, 1.072, 1.068, 1.064, 1.060, 1.056, 1.052, 1.048, 1.044, 1.040, 1.036, 1.032, 1.028, 1.024, 1.020, 1.016, 1.012, 1.008, 1.004, 1.000, 0.996, 0.992, 0.988, 0.984, 0.980, 0.976, 0.972, 0.968, 0.964, 0.960, 0.956, 0.952, 0.948, 0.944, 0.940, 0.936, 0.932, 0.928, 0.924, 0.920, 0.916, 0.912, 0.908, 0.904, 0.900, 0.896, 0.892, 0.888, 0.884, 0.880, 0.876, 0.872, 0.868, 0.864, 0.860, 0.856, 0.852, 0.848, 0.844, 0.840, 0.836, 0.832, 0.828, 0.824, 0.820, 0.816, 0.812, 0.808, 0.804, 0.800, 0.796, 0.792, 0.788, 0.784, 0.780, 0.776, 0.772, 0.768, 0.764, 0.760, 0.756, 0.752, 0.748, 0.744, 0.740, 0.736, 0.732, 0.728, 0.724, 0.720, 0.716, 0.712, 0.708, 0.704, 0.700, 0.696, 0.692, 0.688, 0.684, 0.680, 0.676, 0.672, 0.668, 0.664, 0.660, 0.656, 0.652, 0.648, 0.644, 0.640, 0.636, 0.632, 0.628, 0.624, 0.620, 0.616, 0.612, 0.608, 0.604, 0.600, 0.596, 0.592, 0.588, 0.584, 0.580, 0.576, 0.572, 0.568, 0.564, 0.560, 0.556, 0.552, 0.548, 0.544, 0.540, 0.536, 0.532, 0.528, 0.524, 0.520, 0.516, 0.512, 0.508, 0.504, 0.500, 0.496, 0.492, 0.488, 0.484, 0.480, 0.476, 0.472, 0.468, 0.464, 0.460, 0.456, 0.452, 0.448, 0.444

| Parameter                  | Value                                              |
|----------------------------|----------------------------------------------------|
| 1 Data File Name           | E:/ hwx 400/ 2021-11-hwx-H/ 144.fid                |
| 2 Title                    | 2021-1-hwx-H 144.fid                               |
| 3 Comment                  |                                                    |
| 4 Origin                   | Bruker BioSpin GmbH                                |
| 5 Owner                    | nmrsu                                              |
| 6 Site                     |                                                    |
| 7 Instrument               | Avance                                             |
| 8 Author                   |                                                    |
| 9 Solvent                  | CDCl3                                              |
| 10 Temperature             | 295.7                                              |
| 11 Pulse Sequence          | zg30                                               |
| 12 Experiment              | 1D                                                 |
| 13 Probe                   | Z116098_0916 (PA<br>BBO 400S1 BBF-H-<br>D-05 Z SP) |
| 14 Number of Scans         | 4                                                  |
| 15 Receiver Gain           | 101.0                                              |
| 16 Relaxation Delay        | 1.0000                                             |
| 17 Pulse Width             | 10.0000                                            |
| 18 Presaturation Frequency |                                                    |
| 19 Acquisition Time        | 3.9977                                             |
| 20 Acquisition Date        | 2021-11-08T19:24:11                                |
| 21 Modification Date       | 2021-11-08T19:23:22                                |
| 22 Class                   |                                                    |
| 23 Spectrometer Frequency  | 400.13                                             |
| 24 Spectral Width          | 8196.7                                             |
| 25 Lowest Frequency        | -1637.6                                            |
| 26 Nucleus                 | 1H                                                 |
| 27 Acquired Size           | 32768                                              |
| 28 Spectral Size           | 65536                                              |

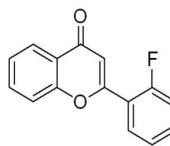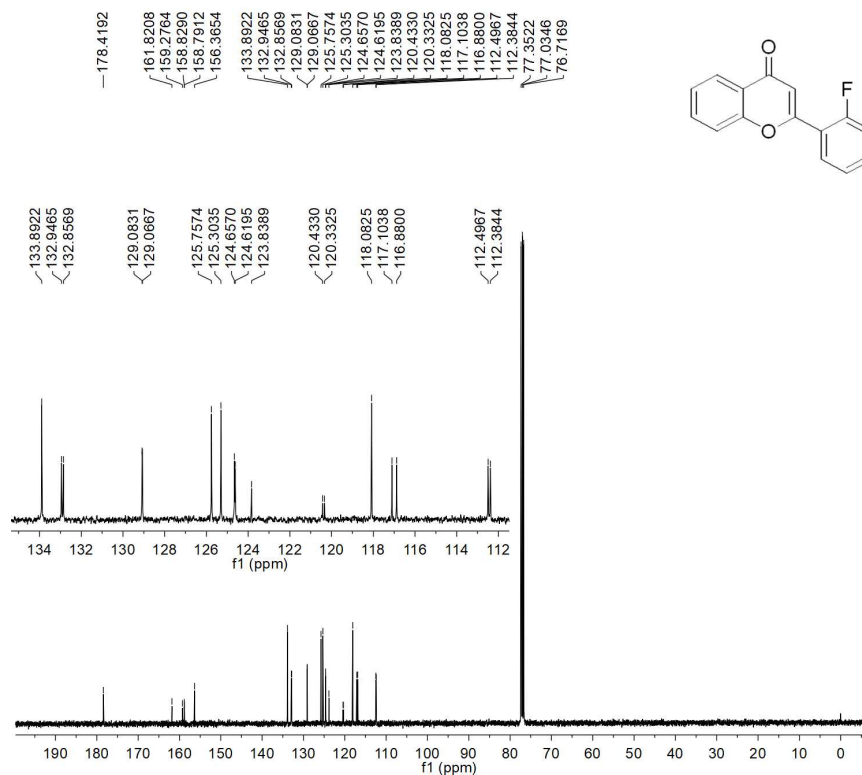

|    | Parameter                 | Value                                               |
|----|---------------------------|-----------------------------------------------------|
| 1  | Data File Name            | E:/ hwx 400/<br>2021-2-hwx-C/<br>47/ fid            |
| 2  | Title                     | 2021-2-hwx-C.<br>47.fid                             |
| 3  | Comment                   |                                                     |
| 4  | Origin                    | Bruker BioSpin<br>GmbH                              |
| 5  | Owner                     | nmrsu                                               |
| 6  | Site                      |                                                     |
| 7  | Instrument                | Avance                                              |
| 8  | Author                    |                                                     |
| 9  | Solvent                   | CDCl3                                               |
| 10 | Temperature               | 296.2                                               |
| 11 | Pulse Sequence            | zgpg30                                              |
| 12 | Experiment                | 1d                                                  |
| 13 | Probe                     | Z116098_0916<br>(PA BBO 400S<br>BBF-H-D-05 Z<br>SP) |
| 14 | Number of<br>Scans        | 500                                                 |
| 15 | Receiver Gain             | 101.0                                               |
| 16 | Relaxation Delay          | 2.0000                                              |
| 17 | Pulse Width               | 10.0000                                             |
| 18 | Presetration<br>Frequency |                                                     |
| 19 | Acquisition Time          | 1.3763                                              |
| 20 | Acquisition Date          | 2021-11-12T04:<br>50:12                             |
| 21 | Modification<br>Date      | 2021-11-12T04:<br>48:58                             |
| 22 | Class                     |                                                     |
| 23 | Spectrometer<br>Frequency | 100.62                                              |
| 24 | Spectral Width            | 23809.5                                             |
| 25 | Lowest<br>Frequency       | -1843.5                                             |
| 26 | Nucleus                   | 13C                                                 |
| 27 | Acquired Size             | 32768                                               |
| 28 | Spectral Size             | 65536                                               |

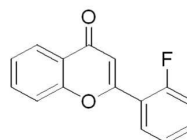

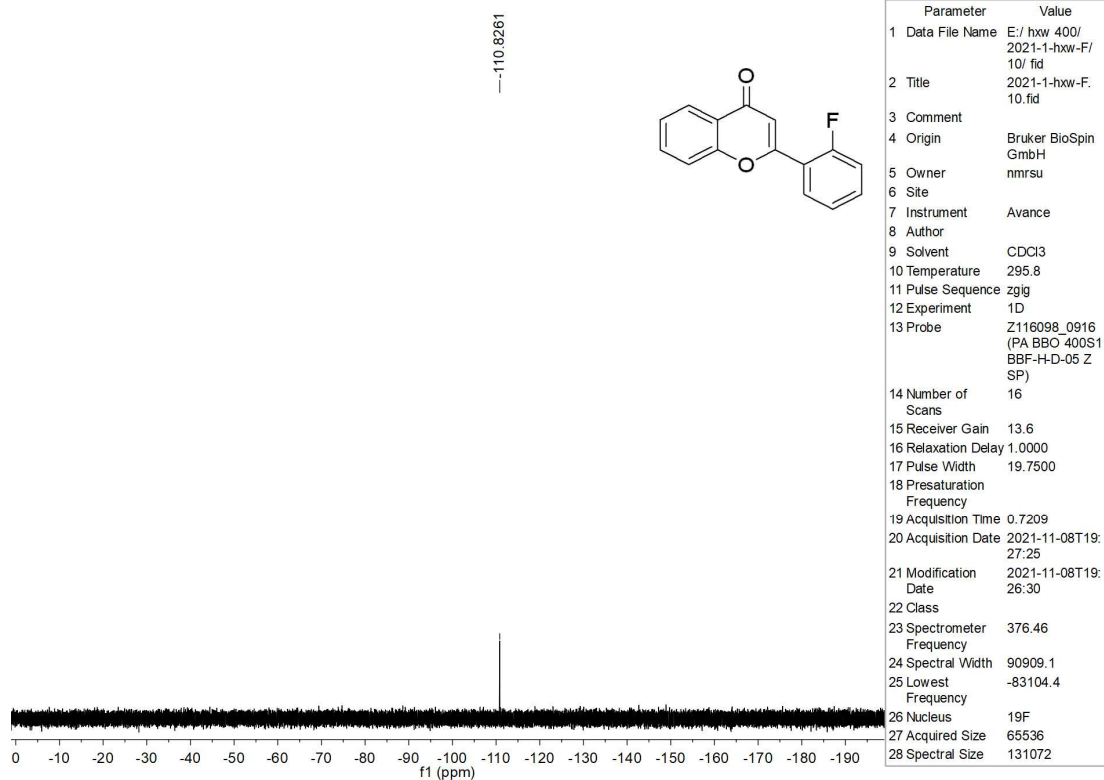

Chemical structure: Clc1cccc(c1)-c2cc3ccccc3oc2=O

| Parameter                     | Value                                                |
|-------------------------------|------------------------------------------------------|
| 1 Data File Name              | E:/ hsw 400/<br>2021-2-hsw-H/<br>130/ fid            |
| 2 Title                       | 2021-2-hsw-H-<br>130.fid                             |
| 3 Comment                     |                                                      |
| 4 Origin                      | Bruker BioSpin<br>GmbH                               |
| 5 Owner                       | nmrsu                                                |
| 6 Site                        |                                                      |
| 7 Instrument                  | Avance                                               |
| 8 Author                      |                                                      |
| 9 Solvent                     | CDCl3                                                |
| 10 Temperature                | 294.7                                                |
| 11 Pulse Sequence             | zg30                                                 |
| 12 Experiment                 | 1D                                                   |
| 13 Probe                      | Z116098_0916<br>(PA BBO 400S1<br>BBF-H-D-05 Z<br>SP) |
| 14 Number of<br>Scans         | 4                                                    |
| 15 Receiver Gain              | 101.0                                                |
| 16 Relaxation Delay           | 1.00000                                              |
| 17 Pulse Width                | 10.0000                                              |
| 18 Presaturation<br>Frequency |                                                      |
| 19 Acquisition Time           | 3.9977                                               |
| 20 Acquisition Date           | 2021-11-02T19:<br>43:44                              |
| 21 Modification<br>Date       | 2021-11-02T19:<br>43:22                              |
| 22 Class                      |                                                      |
| 23 Spectrometer<br>Frequency  | 400.13                                               |
| 24 Spectral Width             | 8196.7                                               |
| 25 Lowest<br>Frequency        | -1638.0                                              |
| 26 Nucleus                    | 1H                                                   |
| 27 Acquired Size              | 32768                                                |
| 28 Spectral Size              | 65536                                                |

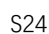



[illegible]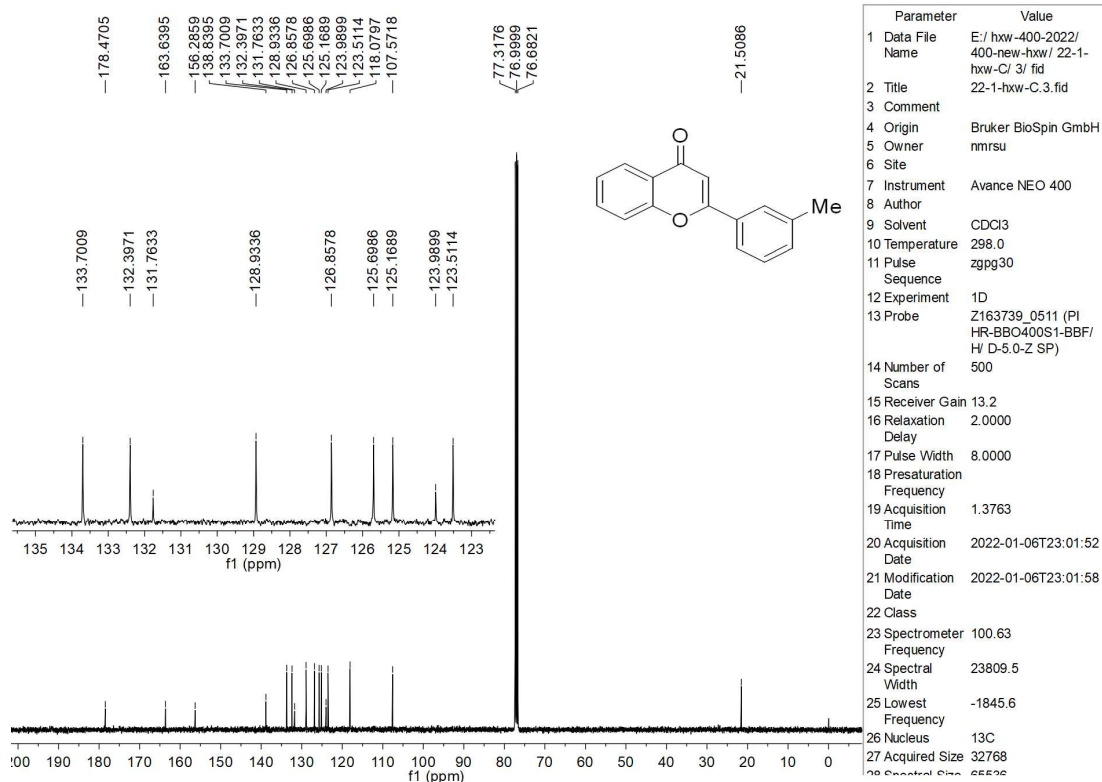

## 2-(3,5-Bis(trifluoromethyl)phenyl)-4H-chromen-4-one (2aj)

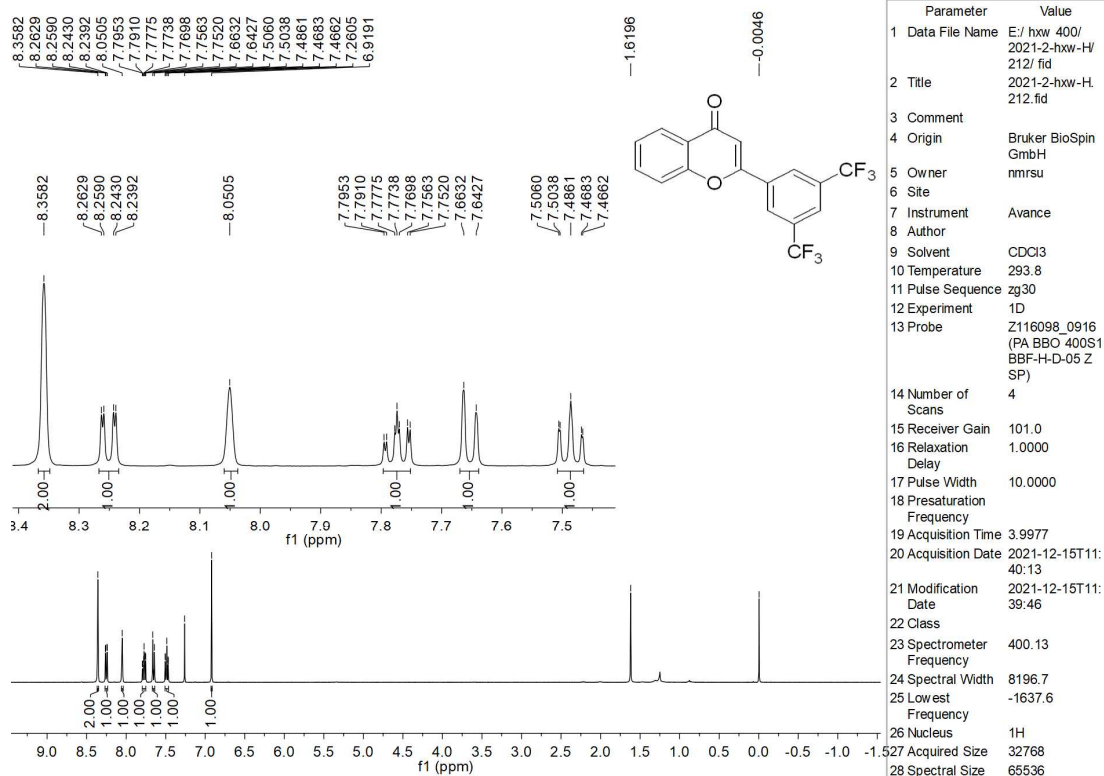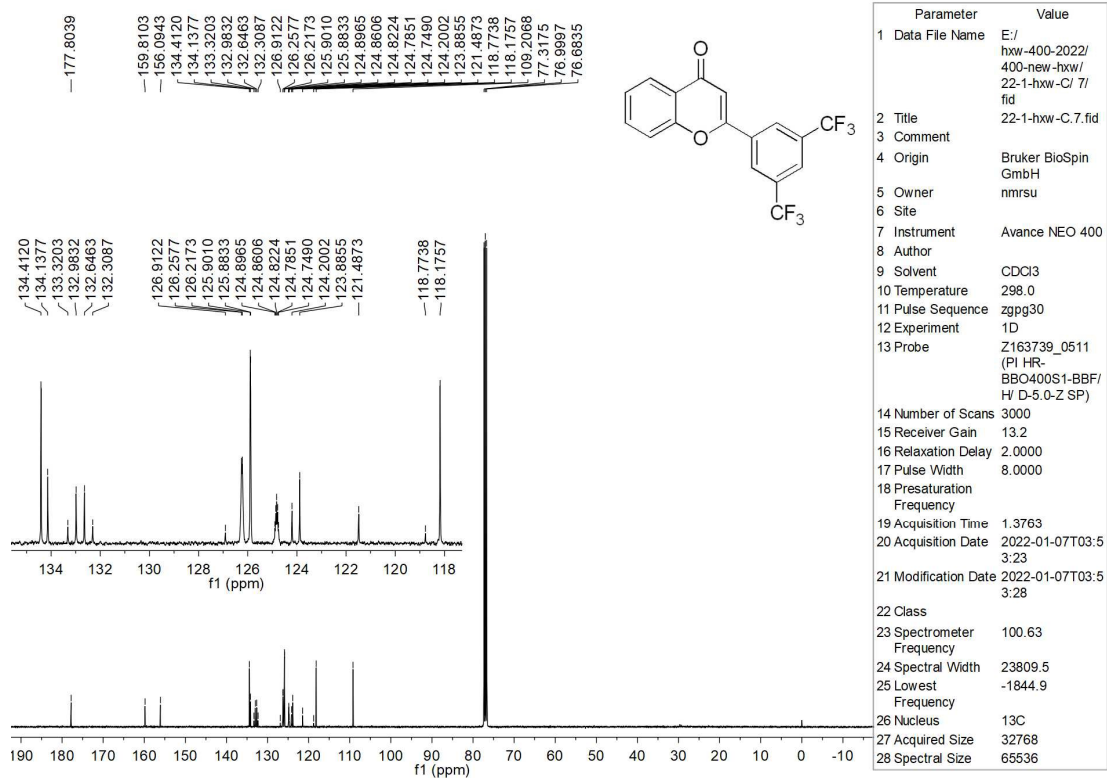



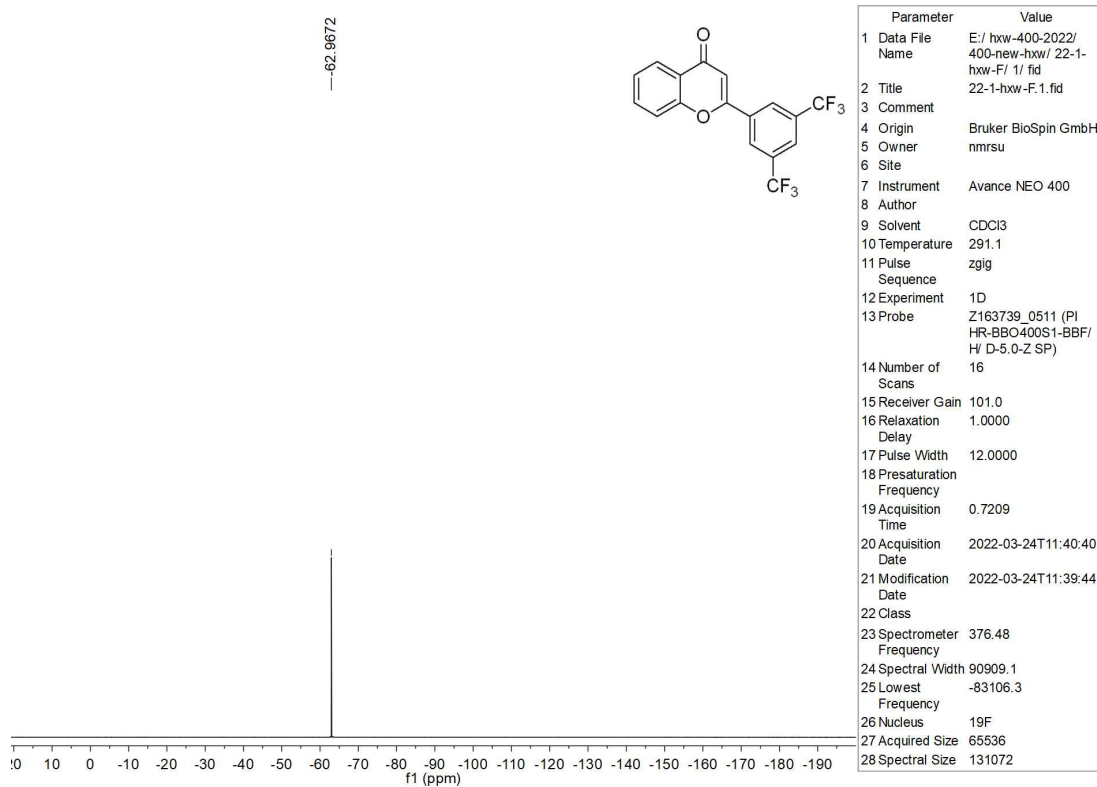

Chemical structure of 2-(thiophen-2-yl)-2H-chromene:

c1ccc2c(c1)oc3ccccc3c2-c4ccsc4

<sup>1</sup>H NMR spectrum (CDCl<sub>3</sub>) of compound 1. The x-axis represents the chemical shift in ppm (f1), ranging from 0.0 to 10.0. The spectrum shows several multiplets in the aromatic region (6.8-8.3 ppm) and a singlet in the aliphatic region (7.4 ppm). Integration values are provided below the peaks.

| Chemical Shift (ppm)                                                                                           | Integration |
|----------------------------------------------------------------------------------------------------------------|-------------|
| 8.2280, 8.2236, 8.2083, 8.2039                                                                                 | 1.00        |
| 8.0360, 8.0327, 8.0253                                                                                         | 1.00        |
| 7.7094, 7.7050, 7.6916, 7.6878, 7.6839, 7.6704, 7.6661, 7.5413, 7.5206                                         | 1.00        |
| 7.5079, 7.5045, 7.4950, 7.4916, 7.4873, 7.4598, 7.4545, 7.4470, 7.4302, 7.4275, 7.4100, 7.3925, 7.3898, 7.3860 | 1.00        |
| 7.4000                                                                                                         | 1.00        |

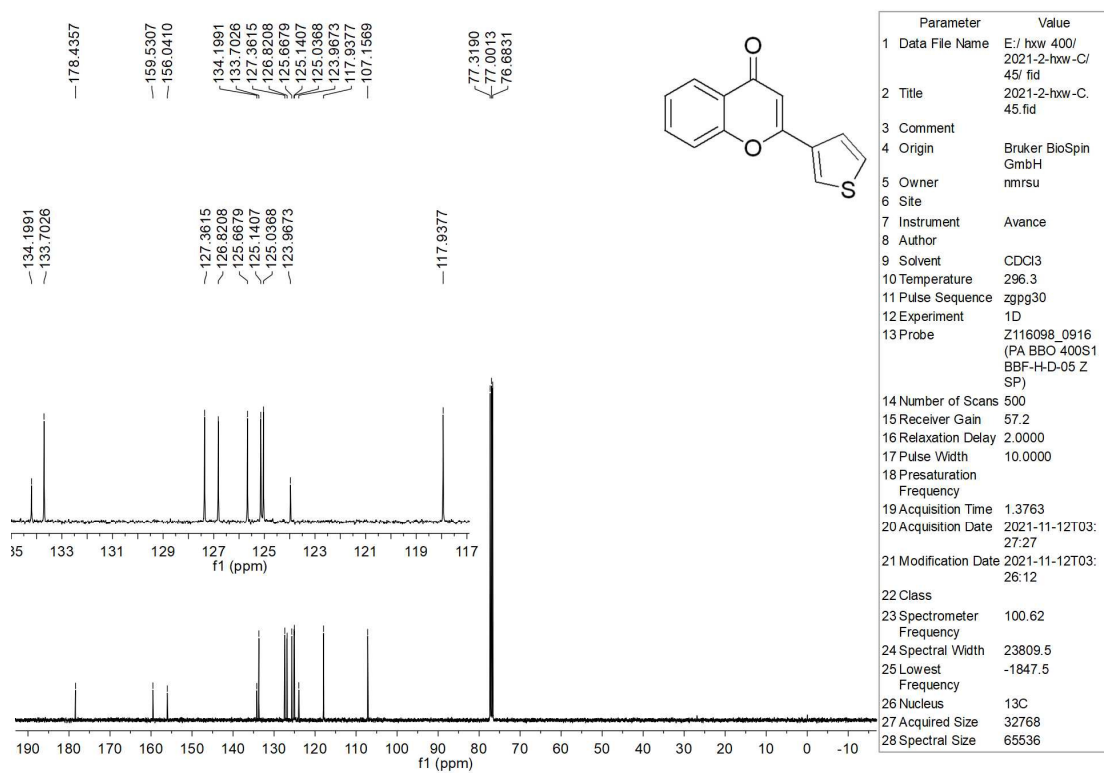

The figure displays two <sup>1</sup>H NMR spectra of compound 1 in CDCl<sub>3</sub>. The top spectrum shows the full range from 0 to 9 ppm, with peaks labeled with their chemical shifts. The bottom spectrum is a zoomed-in view of the aromatic region from 7.4 to 9.5 ppm. The chemical structure of compound 1 is shown as an inset. The x-axis is labeled 'f1 (ppm)'.

Chemical structure of compound 1: O=C1C(=O)c2ccccc2O1-c3ccc4ccccc4c3

<sup>1</sup>H NMR peaks (ppm):

- 8.3307, 8.3264, 8.3264, 8.3107, 8.3065, 8.1558, 8.1506, 8.1485, 8.1453, 8.1396, 8.1313, 8.1226, 8.0482, 8.0276, 7.9717, 7.9635, 7.9477, 7.7897, 7.7865, 7.7719, 7.7687, 7.7335, 7.7297, 7.7259, 7.7125, 7.7081, 7.6122, 7.6122, 7.6042, 7.6021, 7.5943, 7.5871, 7.5854, 7.5794, 7.5768, 7.5726, 7.5702, 7.5557, 7.5535, 7.5008, 7.4986, 7.4808, 7.4631, 7.4609, 7.2596, 6.9986, 1.5984, 1.5933, -0.0019.

|    | Parameter                   | Value                                       |
|----|-----------------------------|---------------------------------------------|
| 1  | Data File Name              | E:/ hwx 400/ 2021-2-hwx-H 112/ fid          |
| 2  | Title                       | 2021-2-hwx-H 112. fid                       |
| 3  | Comment                     |                                             |
| 4  | Origin                      | Bruker BioSpin GmbH                         |
| 5  | Owner                       | nmrsu                                       |
| 6  | Site                        |                                             |
| 7  | Instrument                  | Avance                                      |
| 8  | Author                      |                                             |
| 9  | Solvent                     | CDCl3                                       |
| 10 | Temperature                 | 294.9                                       |
| 11 | Pulse Sequence              | zg30                                        |
| 12 | Experiment                  | 1D                                          |
| 13 | Probe                       | 1216098_0916 (PA BBO 400S1 BBF-H-D-05 Z SP) |
| 14 | Number of Scans             | 4                                           |
| 15 | Receiver Gain               | 101.0                                       |
| 16 | Relaxation Delay            | 1.0000                                      |
| 17 | Pulse Width                 | 10.0000                                     |
| 18 | Preset Saturation Frequency |                                             |
| 19 | Acquisition Time            | 3.9977                                      |
| 20 | Acquisition Date            | 2021-10-28T19:18:10                         |
| 21 | Modification Date           | 2021-10-28T19:16:56                         |
| 22 | Class                       |                                             |
| 23 | Spectrometer Frequency      | 400.13                                      |
| 24 | Spectral Width              | 8196.7                                      |
| 25 | Lowest Frequency            | -1638.0                                     |
| 26 | Nucleus                     | 1H                                          |
| 27 | Acquired Size               | 32768                                       |
| 28 | Spectral Size               | 65536                                       |

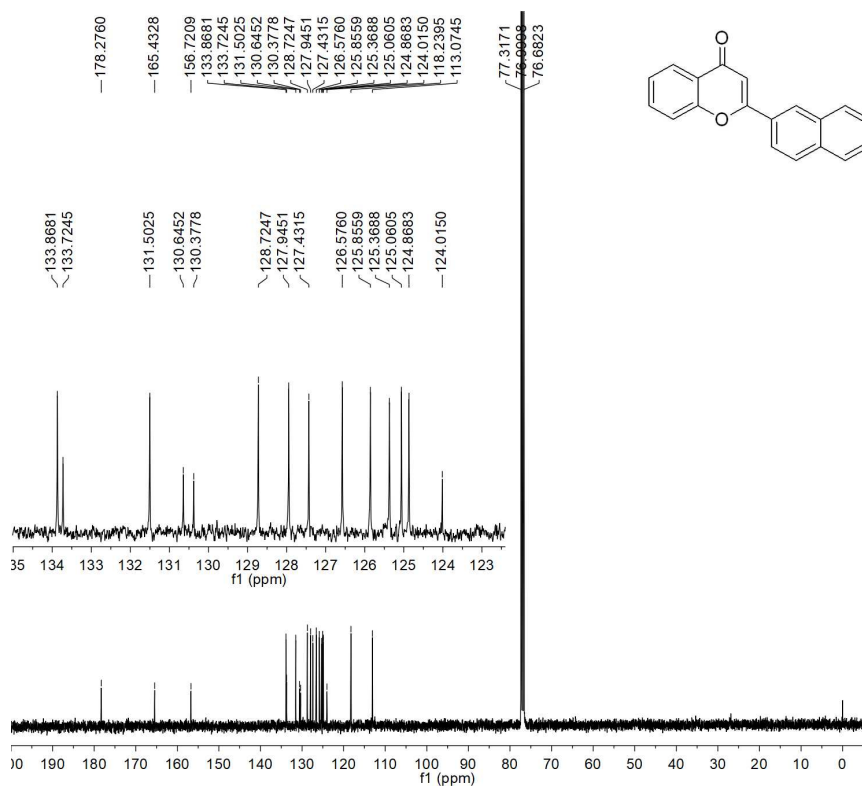

|    | Parameter                   | Value                                                |
|----|-----------------------------|------------------------------------------------------|
| 1  | Data File Name              | E:/hww 400/<br>2021-2-hxw-C/<br>41.fid               |
| 2  | Title                       | 2021-2-hxw-C.<br>41.fid                              |
| 3  | Comment                     |                                                      |
| 4  | Origin                      | Bruker BioSph<br>GmbH                                |
| 5  | Owner                       | nmrsl                                                |
| 6  | Site                        |                                                      |
| 7  | Instrument                  | Avance                                               |
| 8  | Author                      |                                                      |
| 9  | Solvent                     | CDCl3                                                |
| 10 | Temperature                 | 296.4                                                |
| 11 | Pulse Sequence              | zgpg30                                               |
| 12 | Experiment                  | 1D                                                   |
| 13 | Probe                       | Z161098_0916<br>(PA BBO 400S1<br>BBF-H-D-05 Z<br>SP) |
| 14 | Number of<br>Scans          | 800                                                  |
| 15 | Receiver Gain               | 101.0                                                |
| 16 | Relaxation Delay            | 2.0000                                               |
| 17 | Pulse Width                 | 10.0000                                              |
| 18 | Prestaturation<br>Frequency |                                                      |
| 19 | Acquisition Time            | 1.3763                                               |
| 20 | Acquisition Date            | 2021-11-12T01:<br>42:41                              |
| 21 | Modification<br>Date        | 2021-11-12T01:<br>41:28                              |
| 22 | Class                       |                                                      |
| 23 | Spectrometer<br>Frequency   | 100.62                                               |
| 24 | Spectral Width              | 23809.5                                              |
| 25 | Lowest<br>Frequency         | -1846.2                                              |
| 26 | Nucleus                     | 13C                                                  |
| 27 | Acquired Size               | 32768                                                |
| 28 | Spectral Size               | 65536                                                |

Chemical structure of 2-(benzo[c][1,2,5]oxadiazol-2-yl)naphthalene is shown in the top right corner.

<sup>1</sup>H NMR spectrum (CDCl<sub>3</sub>) of 2-(benzo[c][1,2,5]oxadiazol-2-yl)naphthalene. The spectrum displays aromatic signals in the range of 7.5 to 8.5 ppm. Integration values are provided below the peaks.

Chemical shift (ppm) labels (from left to right):

- 8.4389, 8.4157, 8.3631, 8.3433, 8.2713, 8.2619, 8.2463, 8.1889, 8.1784, 8.1689, 8.1553, 8.1158, 8.0919, 8.0711, 8.0521, 7.7645, 7.7451, 7.7258, 7.6088, 7.5879, 7.5155, 7.4964, 7.4778, 7.2604, 7.2570, 6.8477

Integration values (from left to right):

- 1.00, 1.00, 2.00, 1.00, 1.00, 1.00, 1.00, 1.00, 4.00, 2.00, 2.00, 1.00, 4.00, 1.00, 1.00, 1.00

| Parameter                  | Value                                                     |
|----------------------------|-----------------------------------------------------------|
| 1 Data File Name           | E:/ hwx-400-2022/<br>400-new-hwx/ 22-1-<br>hwx-H' 41/ fid |
| 2 Title                    | 22-1-hwx-H.41.fid                                         |
| 3 Comment                  |                                                           |
| 4 Origin                   | Bruker BioSpin GmbH                                       |
| 5 Owner                    | nmrsu                                                     |
| 6 Site                     |                                                           |
| 7 Instrument               | Avance NEO 400                                            |
| 8 Author                   |                                                           |
| 9 Solvent                  | CDCl3                                                     |
| 10 Temperature             | 290.9                                                     |
| 11 Pulse Sequence          | zg30                                                      |
| 12 Experiment              | 1D                                                        |
| 13 Probe                   | Z163739_0511 (PI<br>HR-BBO400S1-BBF/<br>H' D-5.0-Z SP)    |
| 14 Number of Scans         | 4                                                         |
| 15 Receiver Gain           | 101.0                                                     |
| 16 Relaxation Delay        | 1.0000                                                    |
| 17 Pulse Width             | 8.0000                                                    |
| 18 Presaturation Frequency |                                                           |
| 19 Acquisition Time        | 3.9977                                                    |
| 20 Acquisition Date        | 2022-03-22T19:20:20                                       |
| 21 Modification Date       | 2022-03-22T19:19:24                                       |
| 22 Class                   |                                                           |
| 23 Spectrometer Frequency  | 400.15                                                    |
| 24 Spectral Width          | 8196.7                                                    |
| 25 Lowest Frequency        | -1638.2                                                   |
| 26 Nucleus                 | 1H                                                        |
| 27 Acquired Size           | 32768                                                     |
| 28 Spectral Size           | 65536                                                     |

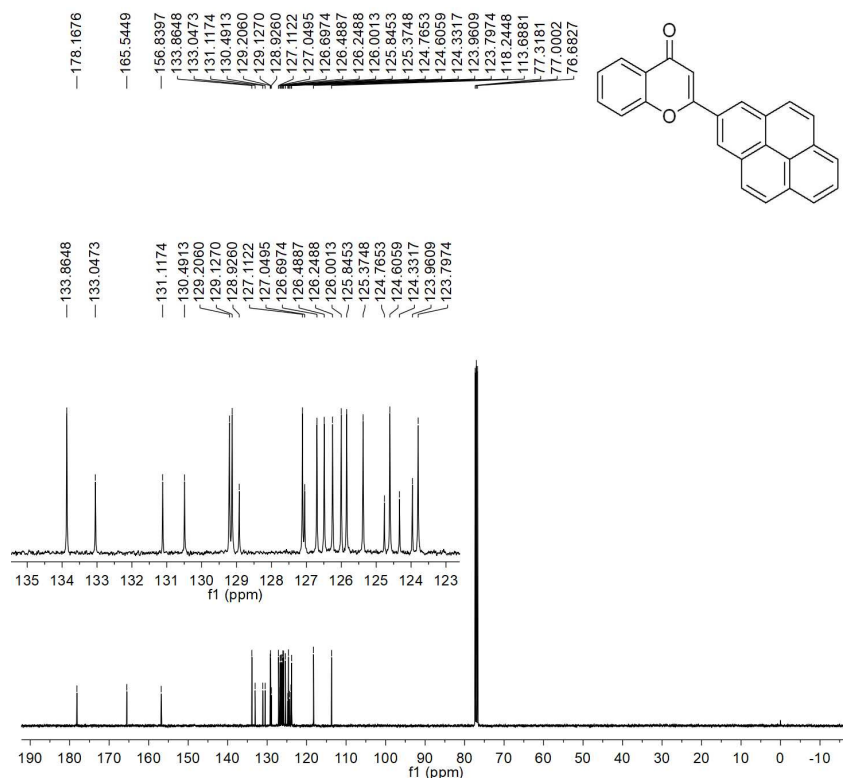

| Parameter                  | Value                                                     |
|----------------------------|-----------------------------------------------------------|
| 1 Data File Name           | E:/ hwx-400-2022/ 400-<br>new-hwx/ 22-1-hwx-C/<br>27/ fid |
| 2 Title                    | 22-1-hwx-C.27.fid                                         |
| 3 Comment                  |                                                           |
| 4 Origin                   | Bruker BioSpin GmbH                                       |
| 5 Owner                    | nmrsu                                                     |
| 6 Site                     |                                                           |
| 7 Instrument               | Avance NEO 400                                            |
| 8 Author                   |                                                           |
| 9 Solvent                  | CDCl3                                                     |
| 10 Temperature             | 291.7                                                     |
| 11 Pulse Sequence          | zgpg30                                                    |
| 12 Experiment              | 1D                                                        |
| 13 Probe                   | D163739_0511 (PI HR-<br>BB0400S1-BBF/ H/<br>D-5.0-Z SP)   |
| 14 Number of Scans         | 600                                                       |
| 15 Receiver Gain           | 13.2                                                      |
| 16 Relaxation Delay        | 2.0000                                                    |
| 17 Pulse Width             | 8.0000                                                    |
| 18 Presaturation Frequency |                                                           |
| 19 Acquisition Time        | 1.3763                                                    |
| 20 Acquisition Date        | 2022-03-23T11:47:16                                       |
| 21 Modification Date       | 2022-03-23T11:46:20                                       |
| 22 Class                   |                                                           |
| 23 Spectrometer Frequency  | 100.63                                                    |
| 24 Spectral Width          | 23809.5                                                   |
| 25 Lowest Frequency        | -1849.8                                                   |
| 26 Nucleus                 | 13C                                                       |
| 27 Acquired Size           | 32768                                                     |
| 28 Spectral Size           | 65536                                                     |

# 6-Methyl-2-(*p*-tolyl)-4*H*-chromen-4-one (2bb)

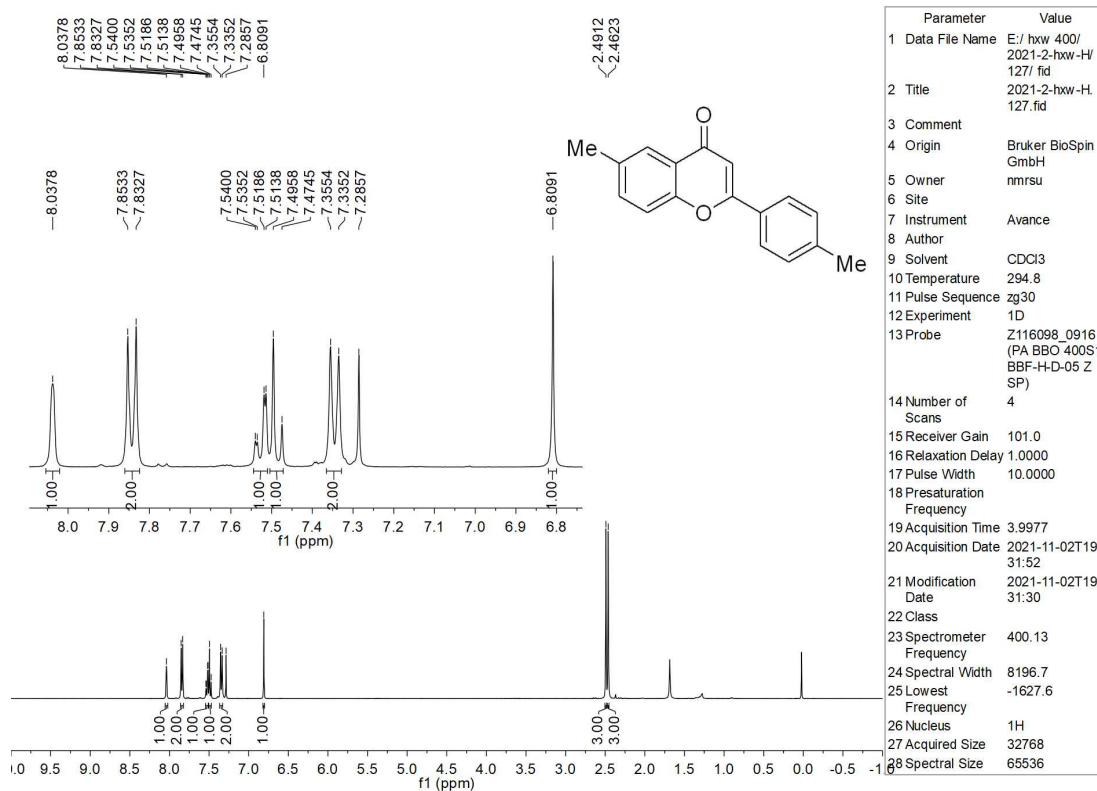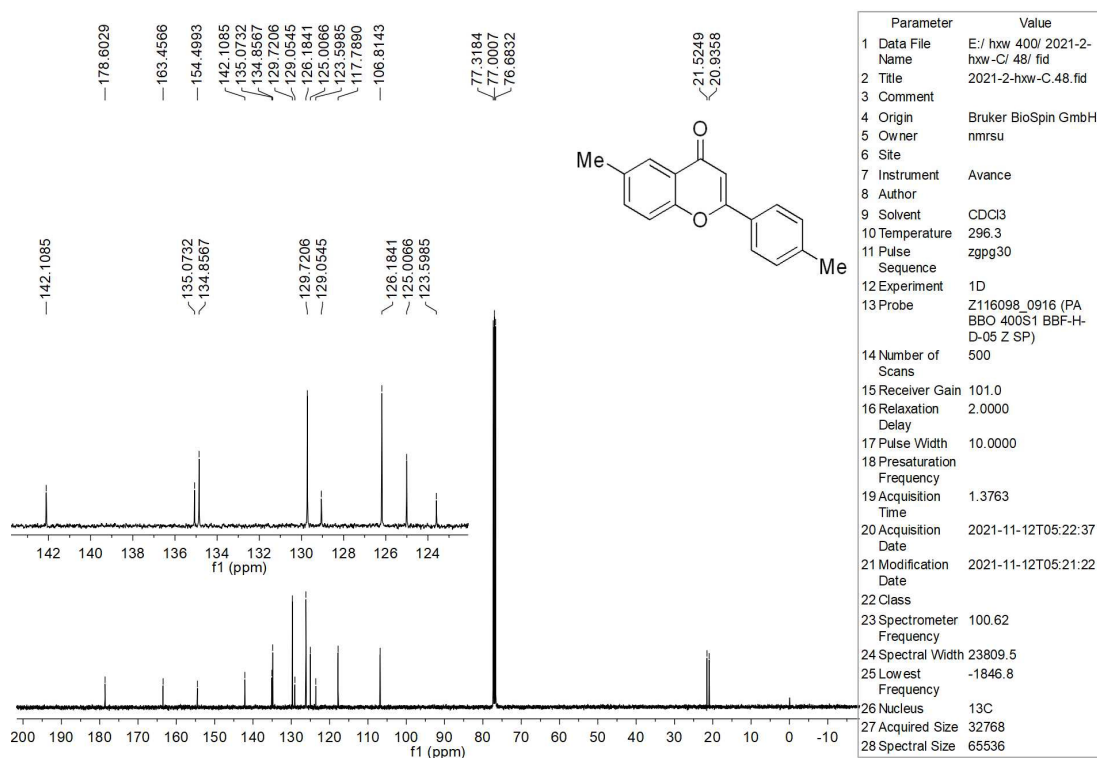



## 2-(4-Methoxyphenyl)-6-methyl-4H-chromen-4-one (2bc)

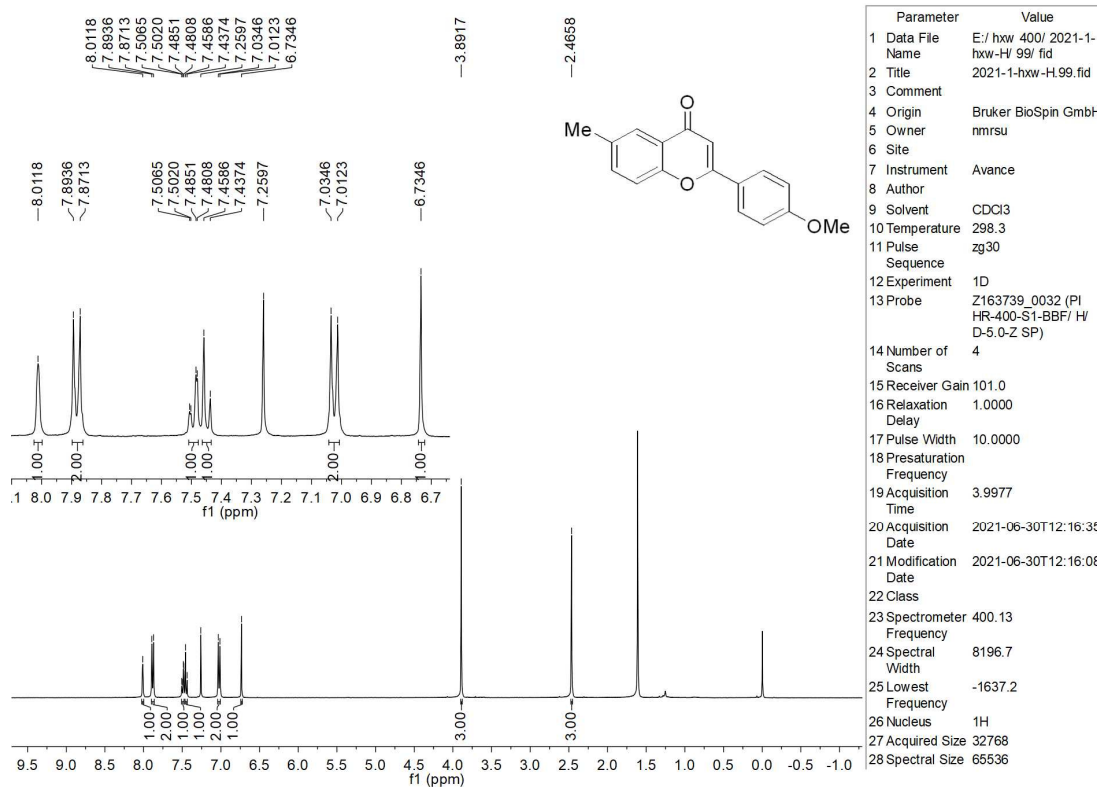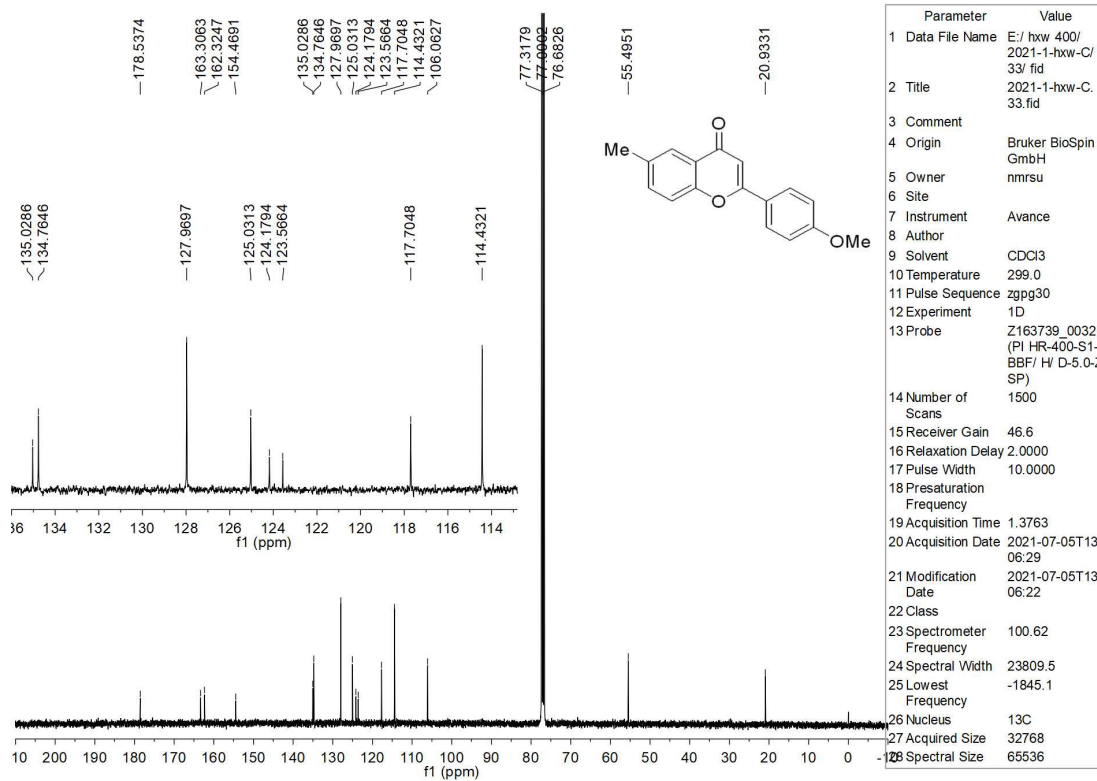

## 2-(4-Fluorophenyl)-6-methyl-4H-chromen-4-one (2bd)

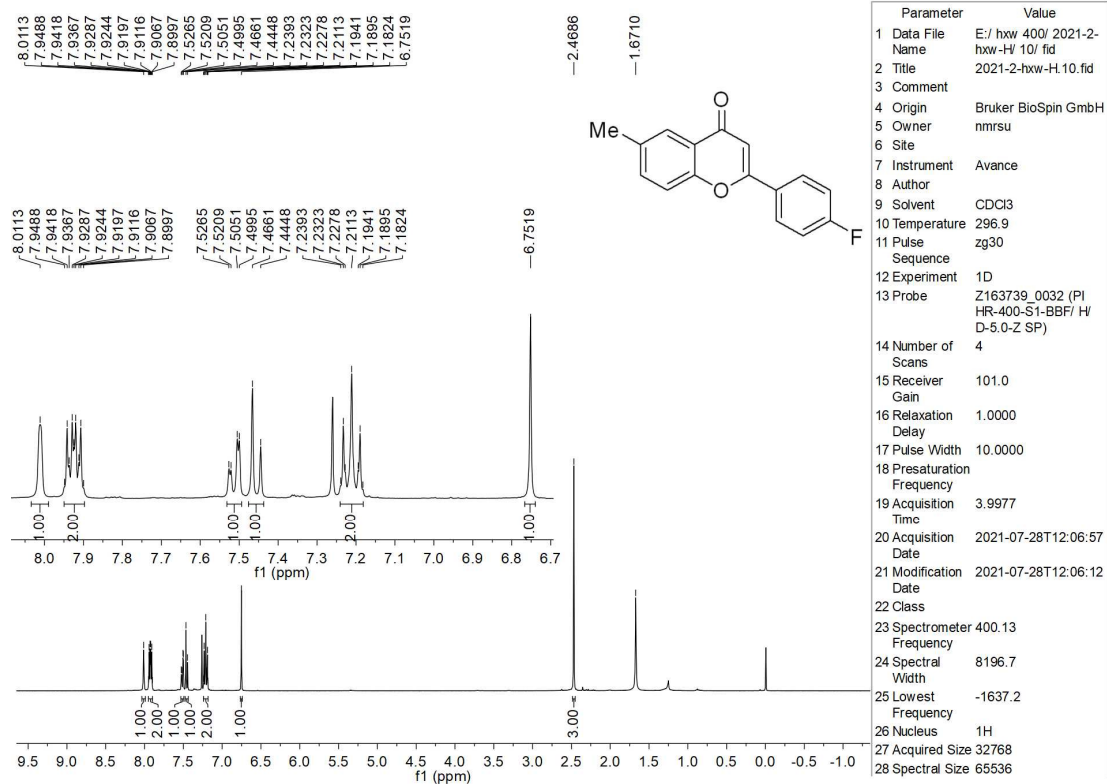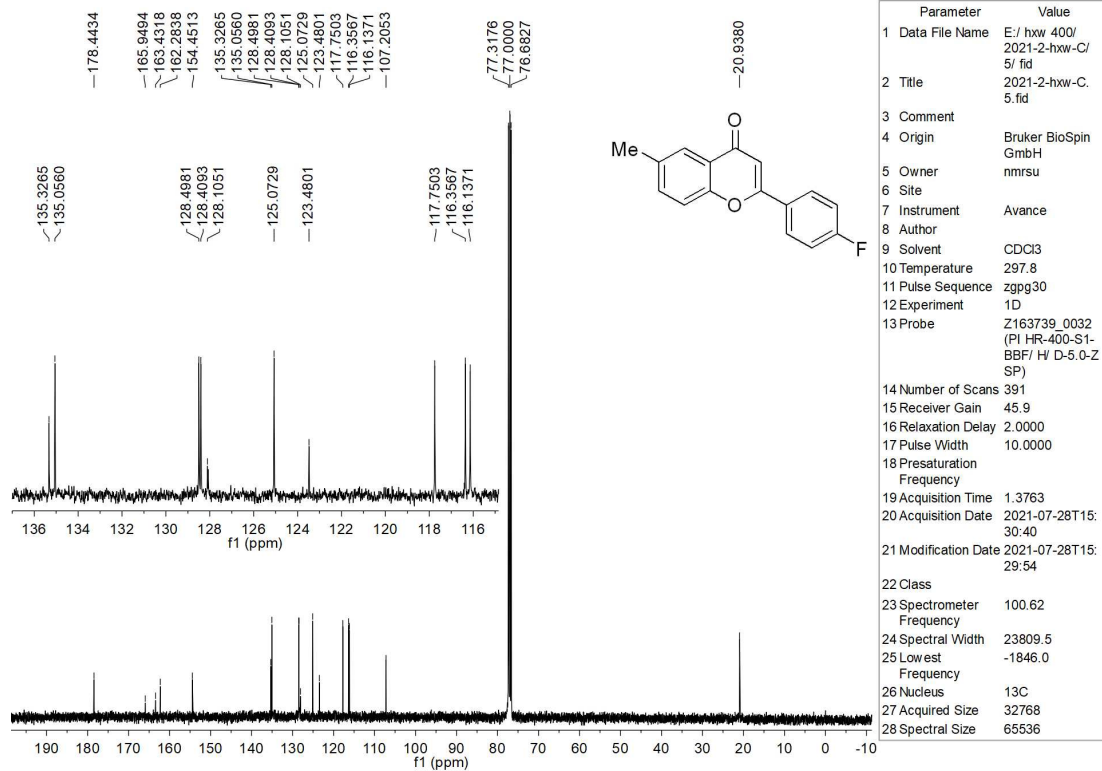

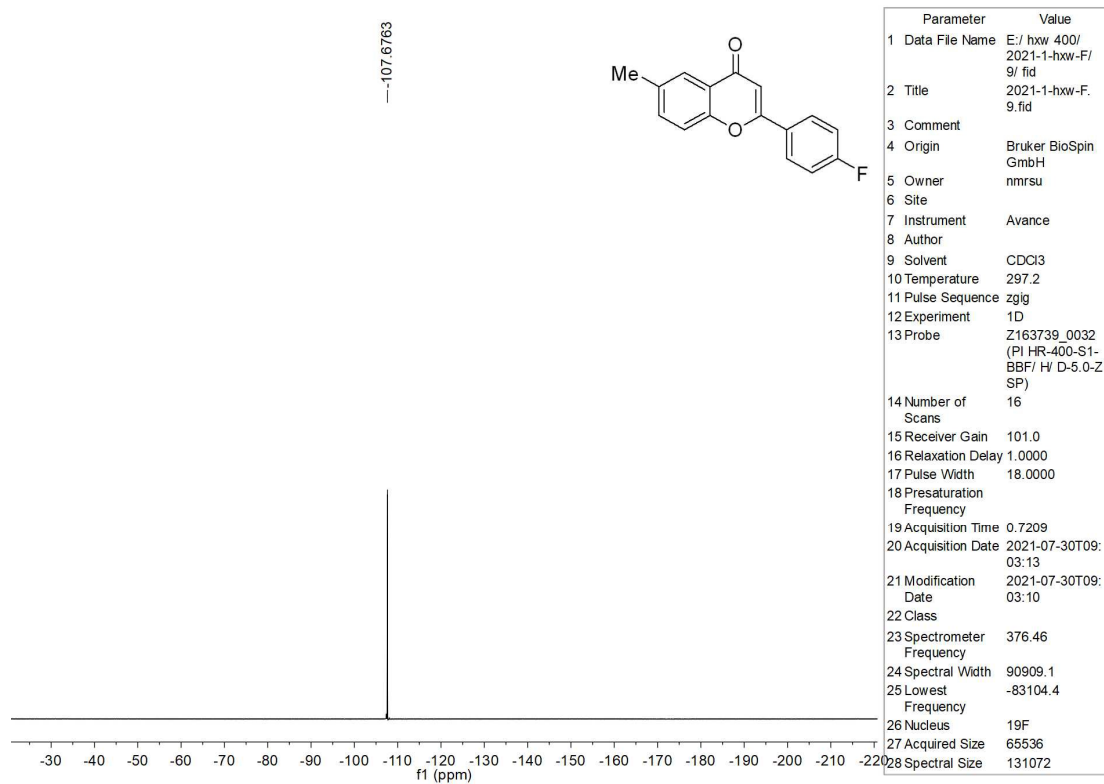



## 2-(4-Chlorophenyl)-6-methyl-4H-chromen-4-one (2be)

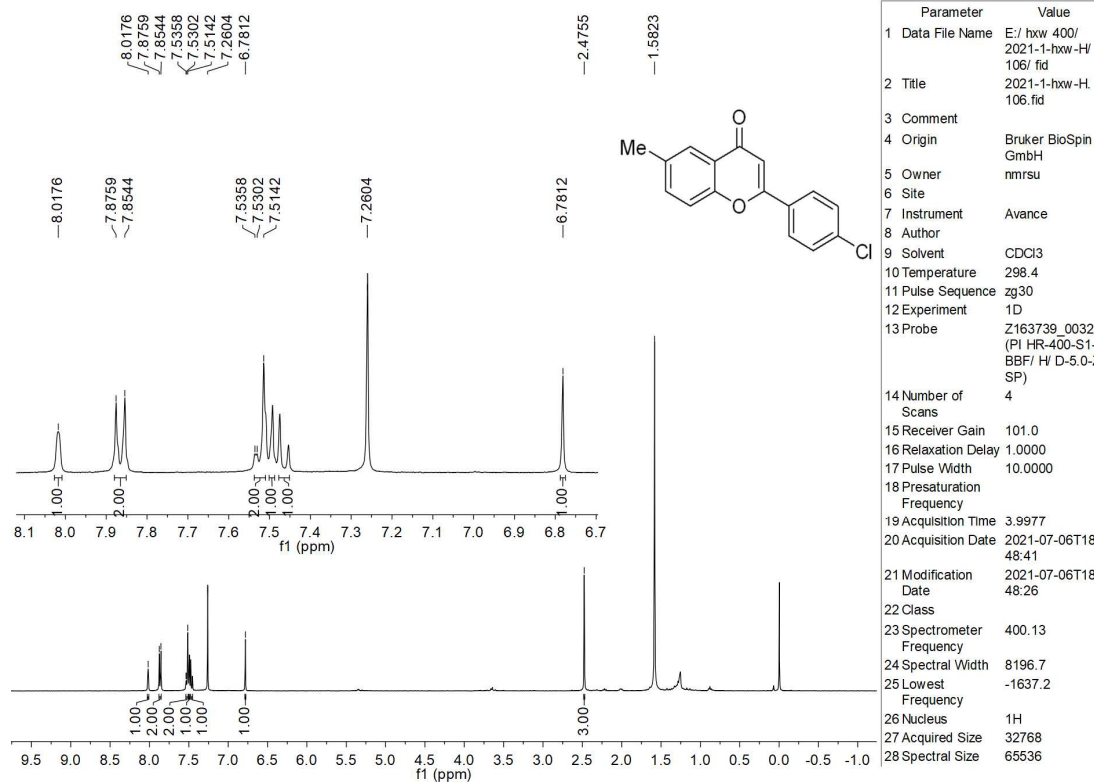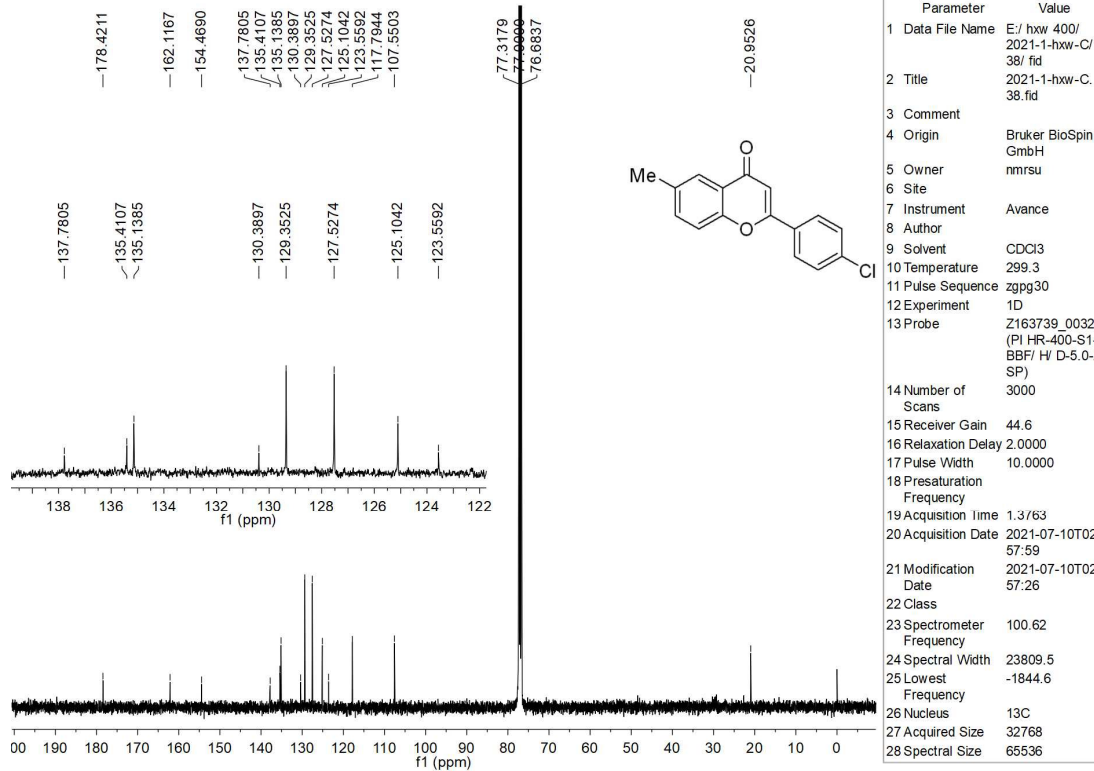

## 2-(4-Bromophenyl)-6-methyl-4H-chromen-4-one (2bf)

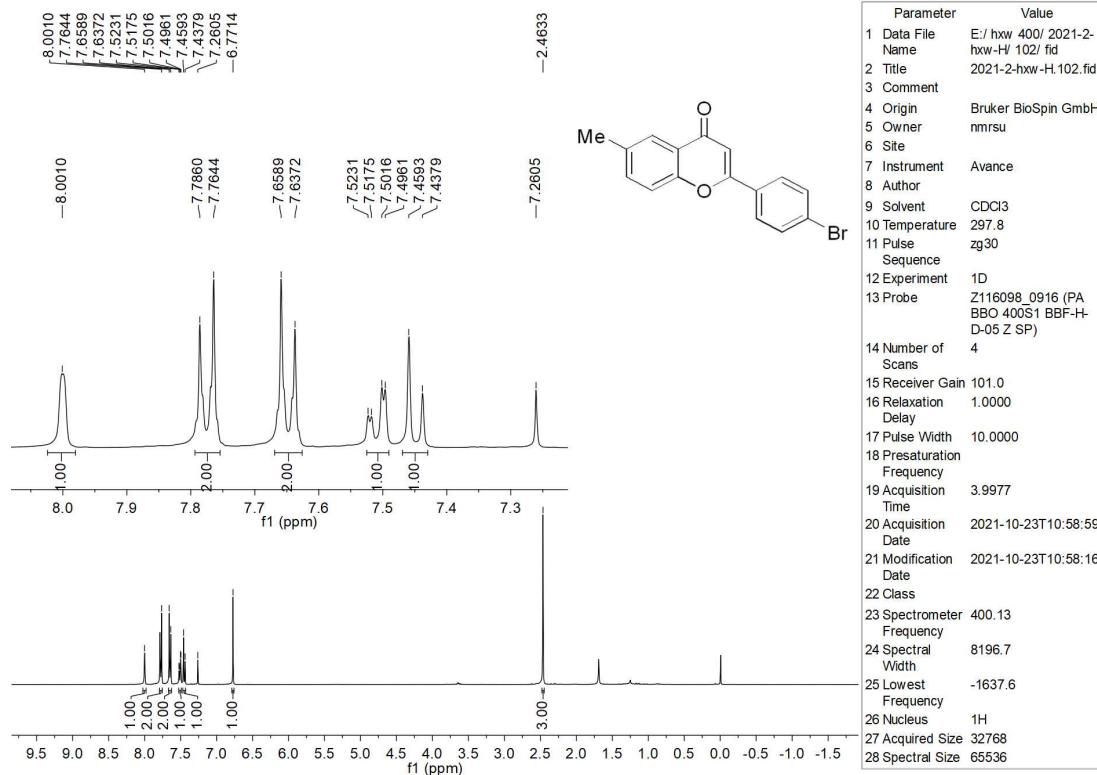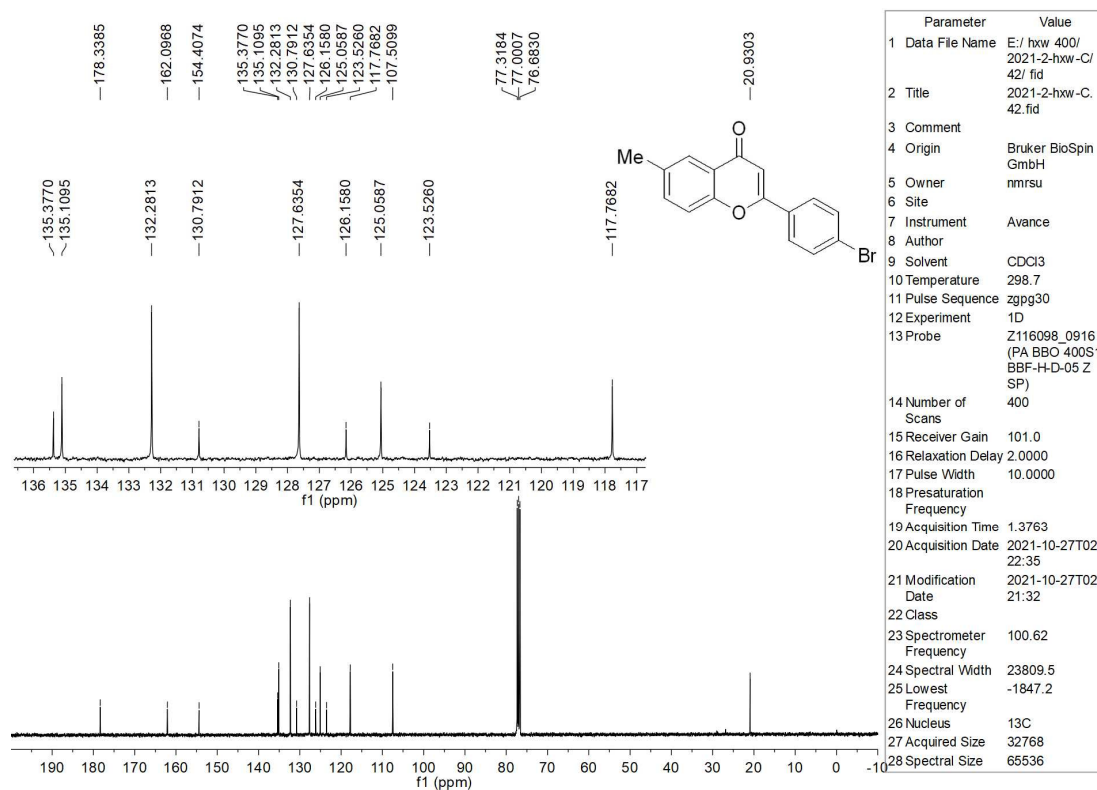

Chemical structure of compound 10: CC1=CC=C(C=C1C2=CC=CC=C2C3=CC(=C(C=C3)OC(=O)C4=CC=CC=C4C)C)C

<sup>1</sup>H NMR (CDCl<sub>3</sub>) peaks (ppm): 8.0248, 7.9886, 7.9676, 7.7424, 7.7212, 7.5818, 7.5614, 7.5275, 7.5062, 7.5009, 7.4907, 7.4695, 7.3045, 7.2841, 7.2844.

<sup>13</sup>C NMR (CDCl<sub>3</sub>) peaks (ppm): 267.04, 2.6516, 2.6322, 2.4713, 1.7237, 1.7049, 1.6859, 1.6673, 1.0039, 0.9856, 0.9672.

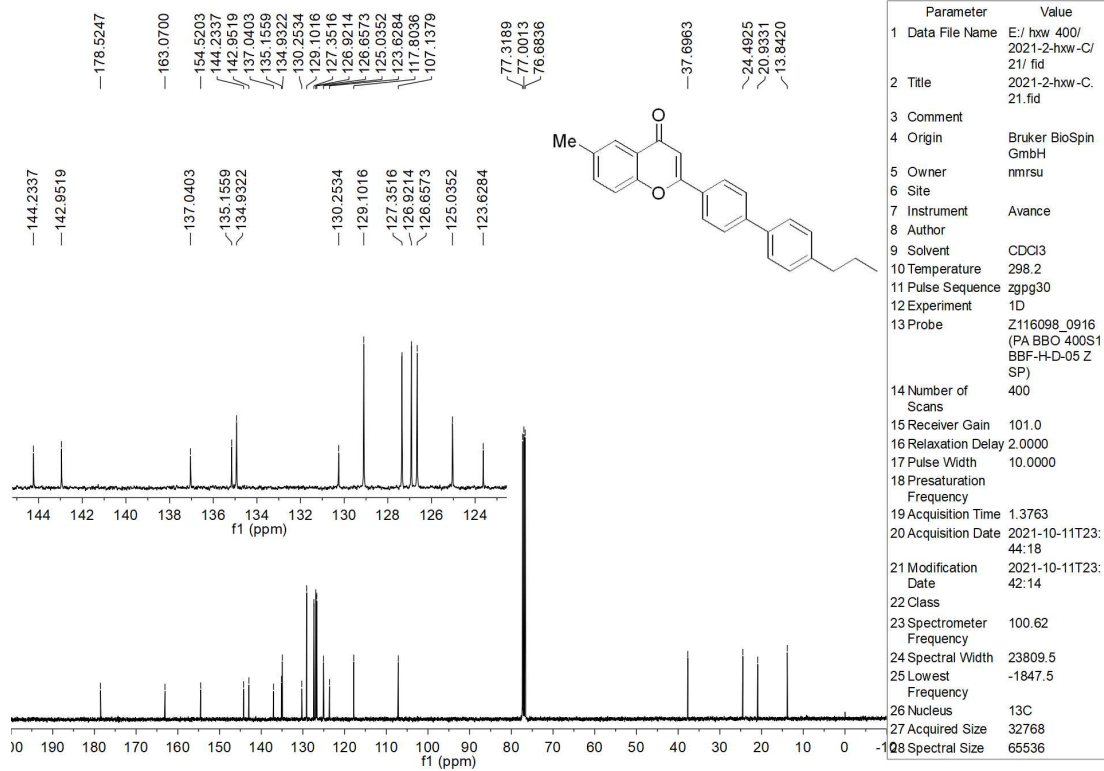

# **6-Methoxy-2-(*p*-tolyl)-4*H*-chromen-4-one (2cb)**

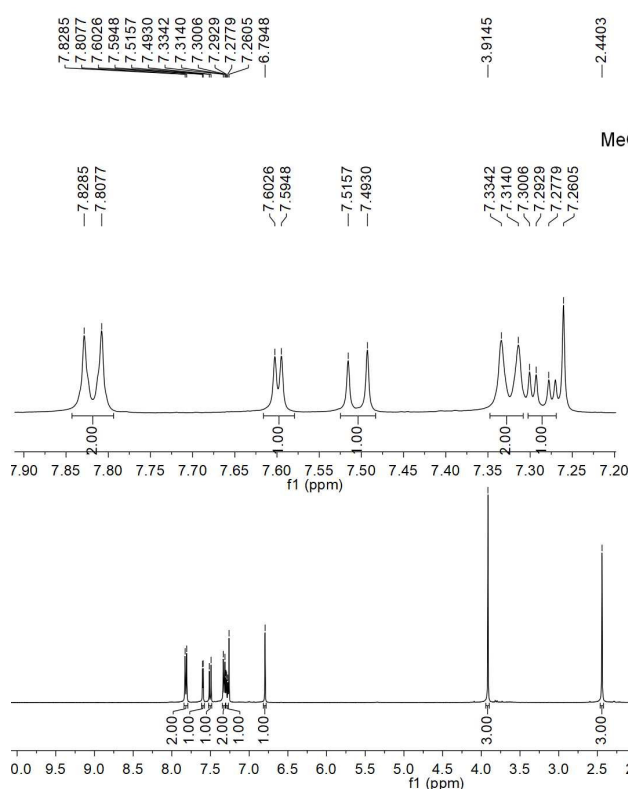

| Parameter                  | Value                                       |
|----------------------------|---------------------------------------------|
| 1 Data File Name           | E:/ hwx 400/ 2021-2-hwx-H/ 142/ fid         |
| 2 Title                    | 2021-2-hwx-H-142.fid                        |
| 3 Comment                  |                                             |
| 4 Origin                   | Bruker BioSpin GmbH                         |
| 5 Owner                    | nmrsu                                       |
| 6 Site                     |                                             |
| 7 Instrument               | Avance                                      |
| 8 Author                   |                                             |
| 9 Solvent                  | CDCl <sub>3</sub>                           |
| 10 Temperature             | 295.4                                       |
| 11 Pulse Sequence          | zg30                                        |
| 12 Experiment              | 1D                                          |
| 13 Probe                   | Z116098_0916 (PA BBO 400S1 BBF-H-D-05 Z SP) |
| 14 Number of Scans         | 4                                           |
| 15 Receiver Gain           | 101.0                                       |
| 16 Relaxation Delay        | 1.0000                                      |
| 17 Pulse Width             | 10.0000                                     |
| 18 Presaturation Frequency |                                             |
| 19 Acquisition Time        | 3.9977                                      |
| 20 Acquisition Date        | 2021-11-11T21:19:47                         |
| 21 Modification Date       | 2021-11-11T21:18:34                         |
| 22 Class                   |                                             |
| 23 Spectrometer Frequency  | 400.13                                      |
| 24 Spectral Width          | 8196.7                                      |
| 25 Lowest Frequency        | -1637.6                                     |
| 26 Nucleus                 | <sup>1</sup> H                              |
| 27 Acquired Size           | 32768                                       |
| 28 Spectral Size           | 65536                                       |

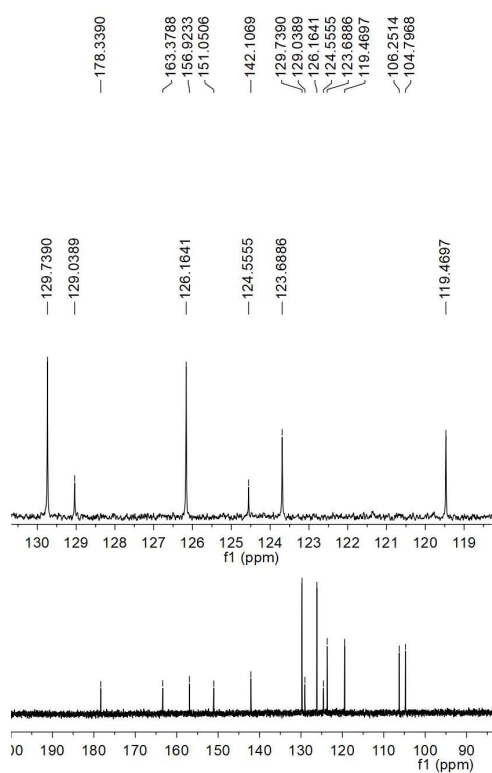

| Parameter                  | Value                                       |
|----------------------------|---------------------------------------------|
| 1 Data File Name           | E:/ hwx 400/ 2021-2-hwx-C/ 39/ fid          |
| 2 Title                    | 2021-2-hwx-C-39.fid                         |
| 3 Comment                  |                                             |
| 4 Origin                   | Bruker BioSpin GmbH                         |
| 5 Owner                    | nmrsu                                       |
| 6 Site                     |                                             |
| 7 Instrument               | Avance                                      |
| 8 Author                   |                                             |
| 9 Solvent                  | CDCl <sub>3</sub>                           |
| 10 Temperature             | 296.2                                       |
| 11 Pulse Sequence          | zgpg30                                      |
| 12 Experiment              | 1D                                          |
| 13 Probe                   | Z116098_0916 (PA BBO 400S1 BBF-H-D-05 Z SP) |
| 14 Number of Scans         | 800                                         |
| 15 Receiver Gain           | 101.0                                       |
| 16 Relaxation Delay        | 2.0000                                      |
| 17 Pulse Width             | 10.0000                                     |
| 18 Presaturation Frequency |                                             |
| 19 Acquisition Time        | 1.3763                                      |
| 20 Acquisition Date        | 2021-11-11T23:49:49                         |
| 21 Modification Date       | 2021-11-11T23:48:36                         |
| 22 Class                   |                                             |
| 23 Spectrometer Frequency  | 100.62                                      |
| 24 Spectral Width          | 23809.5                                     |
| 25 Lowest Frequency        | -1846.5                                     |
| 26 Nucleus                 | <sup>13</sup> C                             |
| 27 Acquired Size           | 32768                                       |
| 28 Spectral Size           | 65536                                       |

# 6-Methoxy-2-(4-methoxyphenyl)-4H-chromen-4-one (2cc)

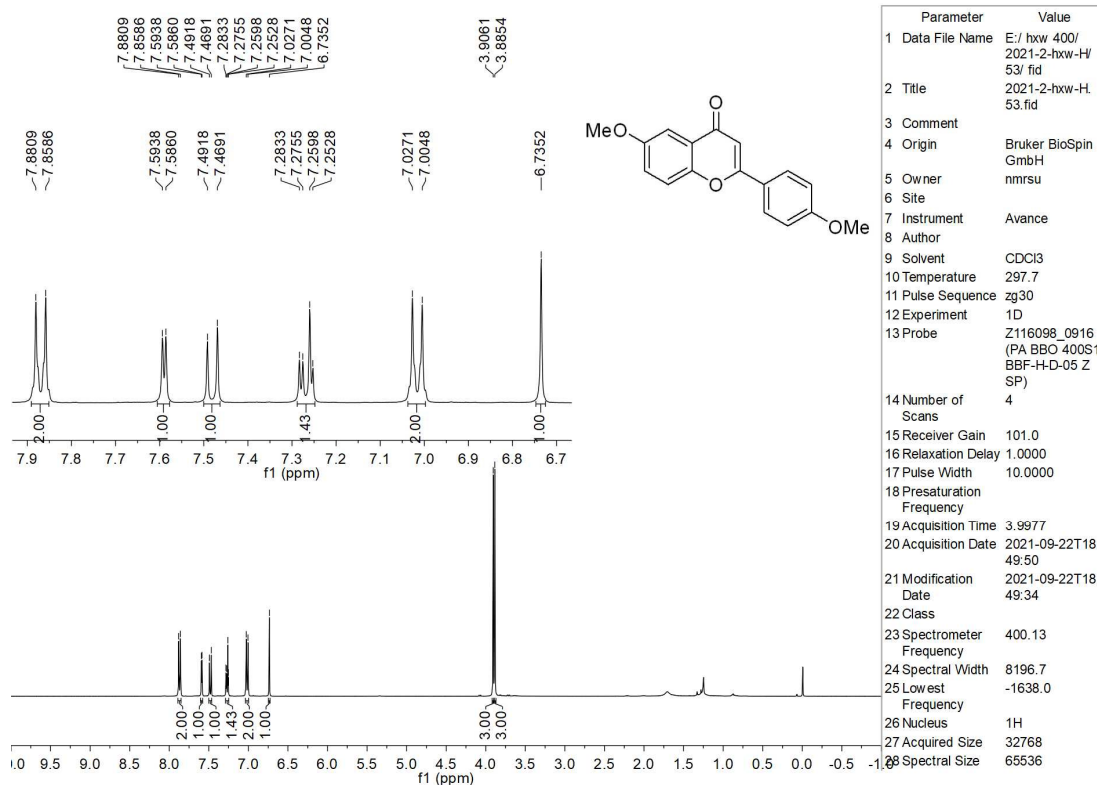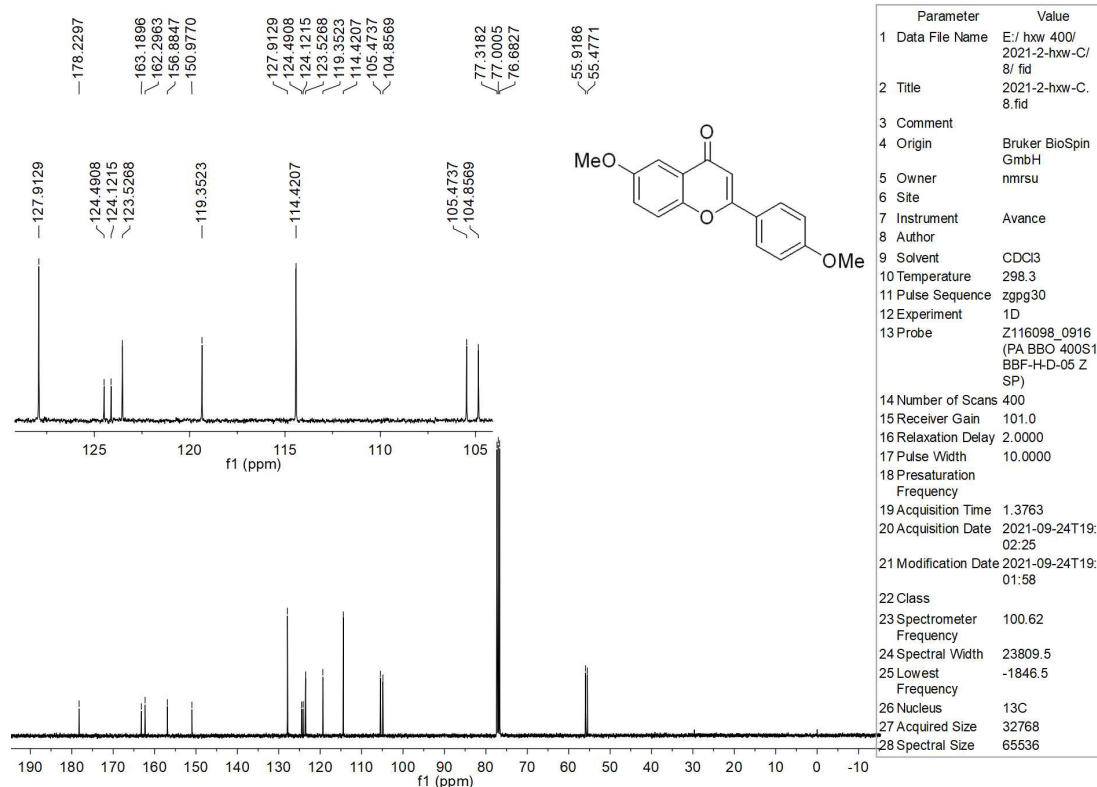



## 2-(4-Fluorophenyl)-6-methoxy-4H-chromen-4-one (2cd)

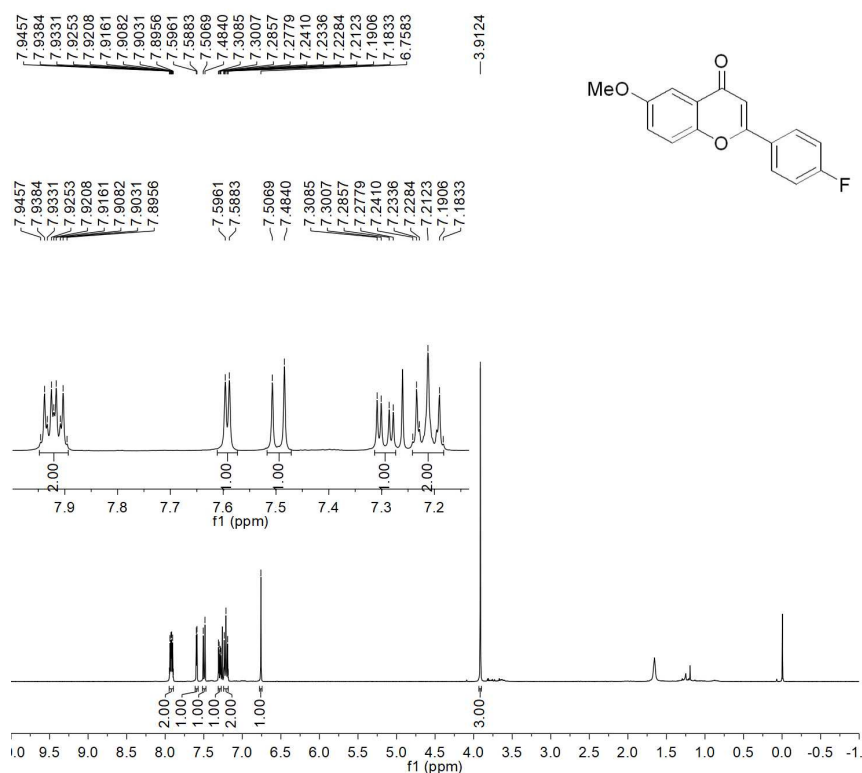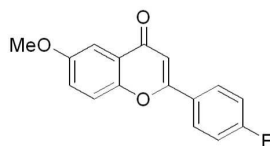

| Parameter                  | Value                                       |
|----------------------------|---------------------------------------------|
| 1 Data File                | E:/ hwx 400/ 2021-2-hwx-H 74/ fid           |
| 2 Title                    | 2021-2-hwx-H.74.fid                         |
| 3 Comment                  |                                             |
| 4 Origin                   | Bruker BioSpin GmbH                         |
| 5 Owner                    | nmrsu                                       |
| 6 Site                     |                                             |
| 7 Instrument               | Avance                                      |
| 8 Author                   |                                             |
| 9 Solvent                  | CDCl <sub>3</sub>                           |
| 10 Temperature             | 297.5                                       |
| 11 Pulse Sequence          | zg30                                        |
| 12 Experiment              | 1D                                          |
| 13 Probe                   | Z116098_0916 (PA BBO 400S1 BBF-H-D-05 Z SP) |
| 14 Number of Scans         | 4                                           |
| 15 Receiver Gain           | 101.0                                       |
| 16 Relaxation Delay        | 1.0000                                      |
| 17 Pulse Width             | 10.0000                                     |
| 18 Presaturation Frequency |                                             |
| 19 Acquisition Time        | 3.9977                                      |
| 20 Acquisition Date        | 2021-10-11T19:07:40                         |
| 21 Modification Date       | 2021-10-11T19:05:38                         |
| 22 Class                   |                                             |
| 23 Spectrometer            | 400.13                                      |
| 24 Spectral Width          | 8196.7                                      |
| 25 Lowest Frequency        | -1637.6                                     |
| 26 Nucleus                 | <sup>1</sup> H                              |
| 27 Acquired Size           | 32768                                       |
| 28 Spectral Size           | 65536                                       |

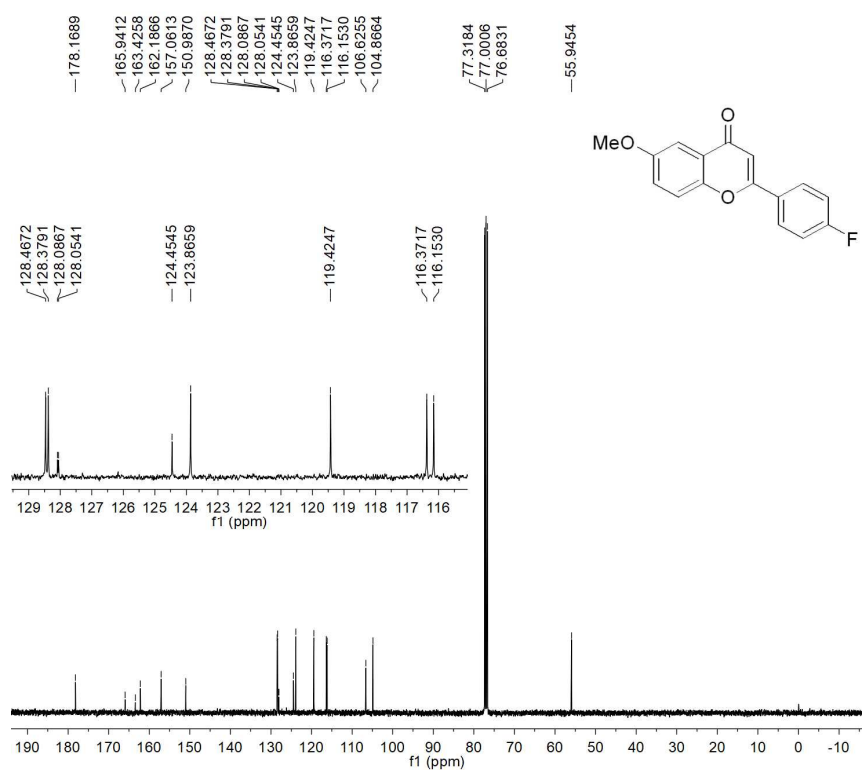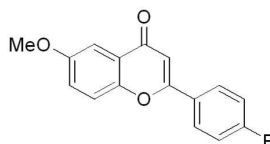

| Parameter                  | Value                                       |
|----------------------------|---------------------------------------------|
| 1 Data File                | E:/ hwx 400/ 2021-2-hwx-C/ 20/ fid          |
| 2 Title                    | 2021-2-hwx-C.20.fid                         |
| 3 Comment                  |                                             |
| 4 Origin                   | Bruker BioSpin GmbH                         |
| 5 Owner                    | nmrsu                                       |
| 6 Site                     |                                             |
| 7 Instrument               | Avance                                      |
| 8 Author                   |                                             |
| 9 Solvent                  | CDCl <sub>3</sub>                           |
| 10 Temperature             | 298.2                                       |
| 11 Pulse Sequence          | zgpg30                                      |
| 12 Experiment              | 1D                                          |
| 13 Probe                   | Z116098_0916 (PA BBO 400S1 BBF-H-D-05 Z SP) |
| 14 Number of Scans         | 400                                         |
| 15 Receiver Gain           | 101.0                                       |
| 16 Relaxation Delay        | 2.0000                                      |
| 17 Pulse Width             | 10.0000                                     |
| 18 Presaturation Frequency |                                             |
| 19 Acquisition Time        | 1.3763                                      |
| 20 Acquisition Date        | 2021-10-11T23:17:06                         |
| 21 Modification Date       | 2021-10-11T23:15:02                         |
| 22 Class                   |                                             |
| 23 Spectrometer            | 100.62                                      |
| 24 Spectral Width          | 23809.5                                     |
| 25 Lowest Frequency        | -1846.1                                     |
| 26 Nucleus                 | <sup>13</sup> C                             |
| 27 Acquired Size           | 32768                                       |
| 28 Spectral Size           | 65536                                       |



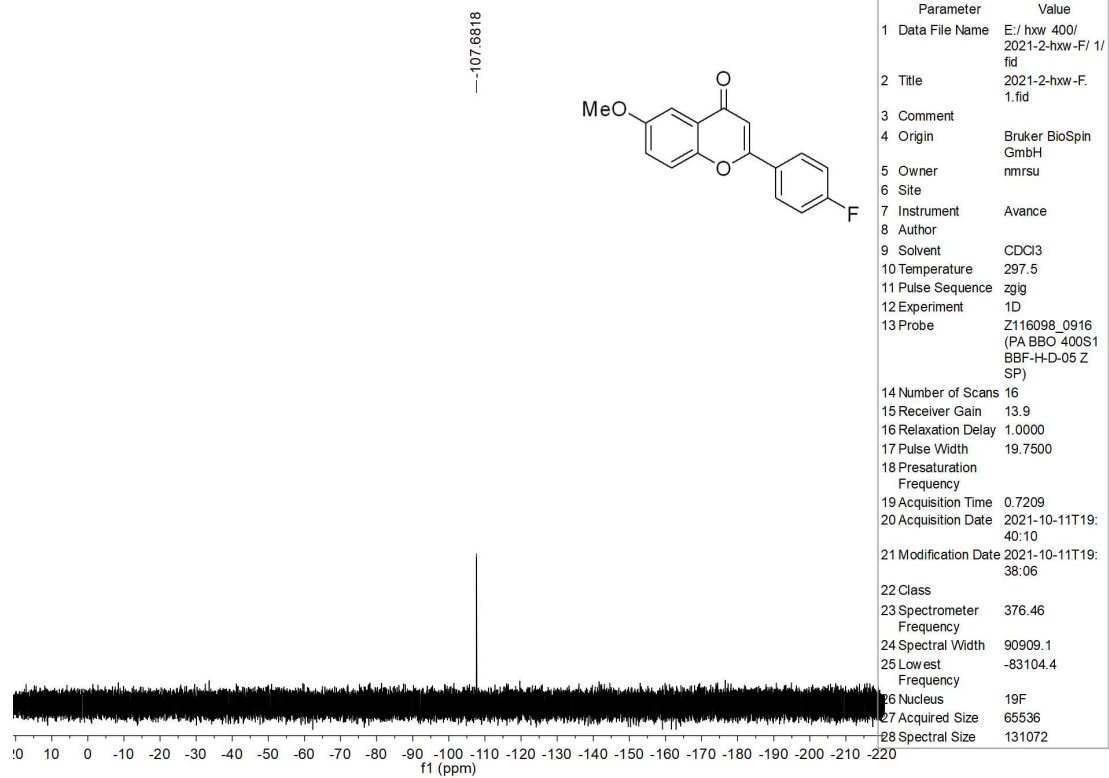

## 2-(4-Chlorophenyl)-6-methoxy-4H-chromen-4-one (2ce)

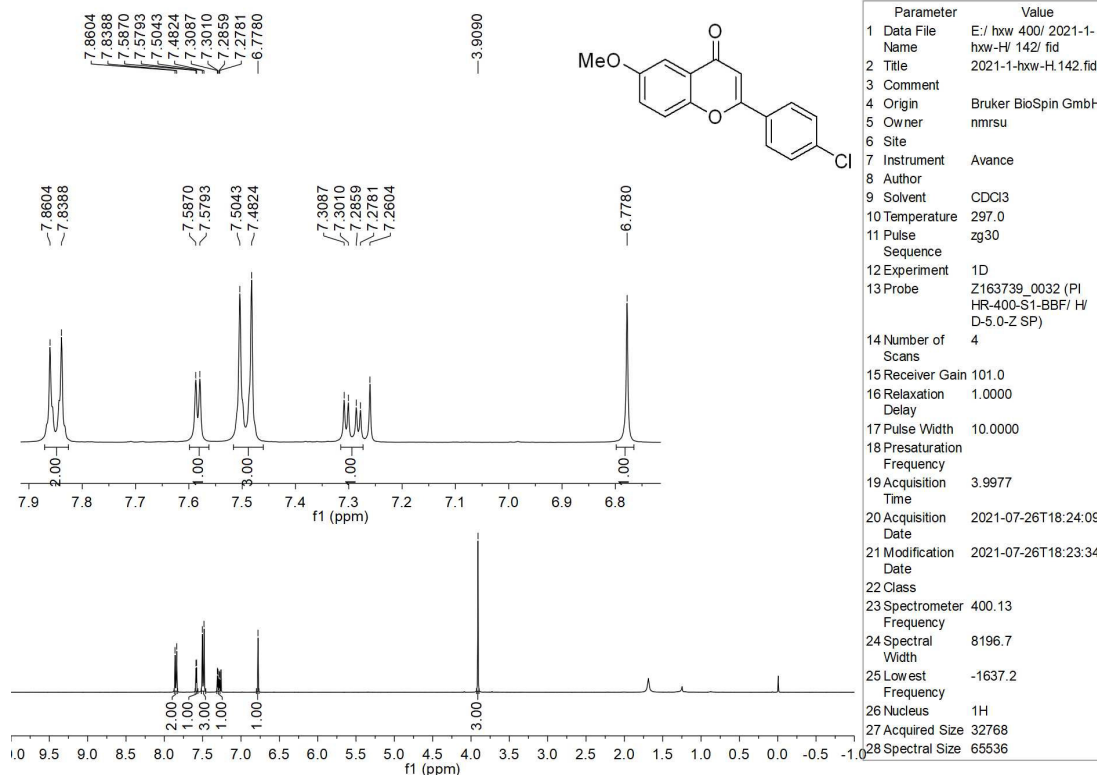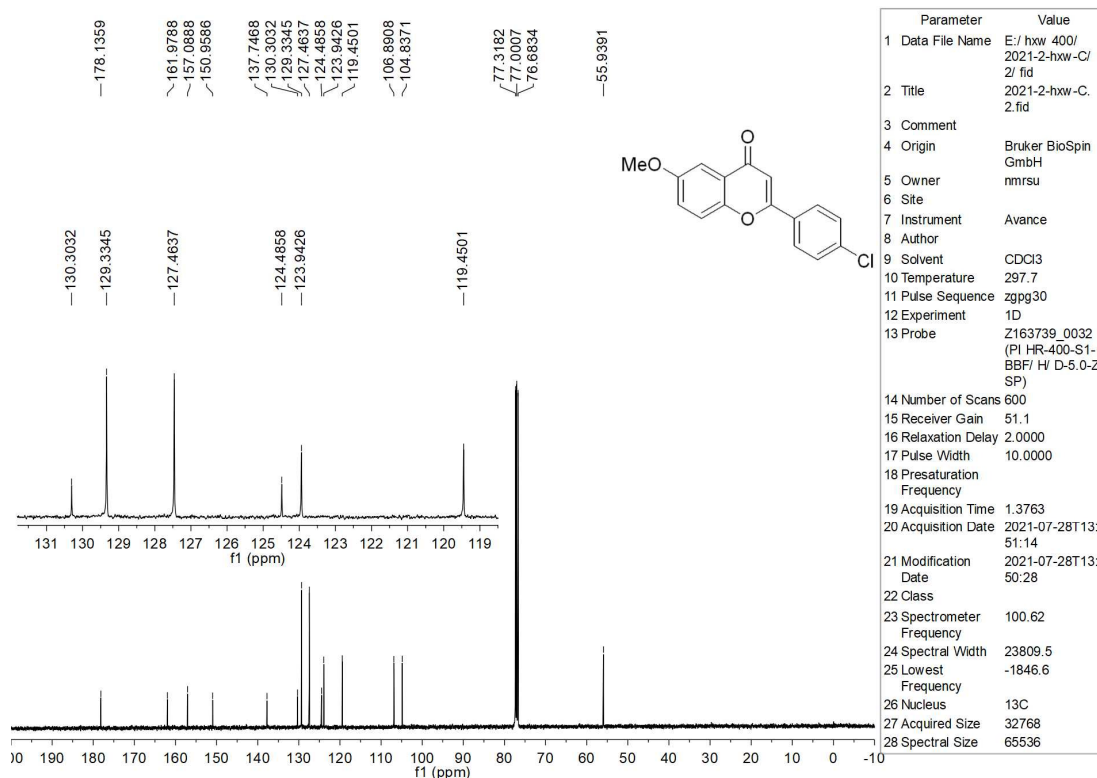

## 2-(4-Bromophenyl)-6-methoxy-4H-chromen-4-one (2cf)

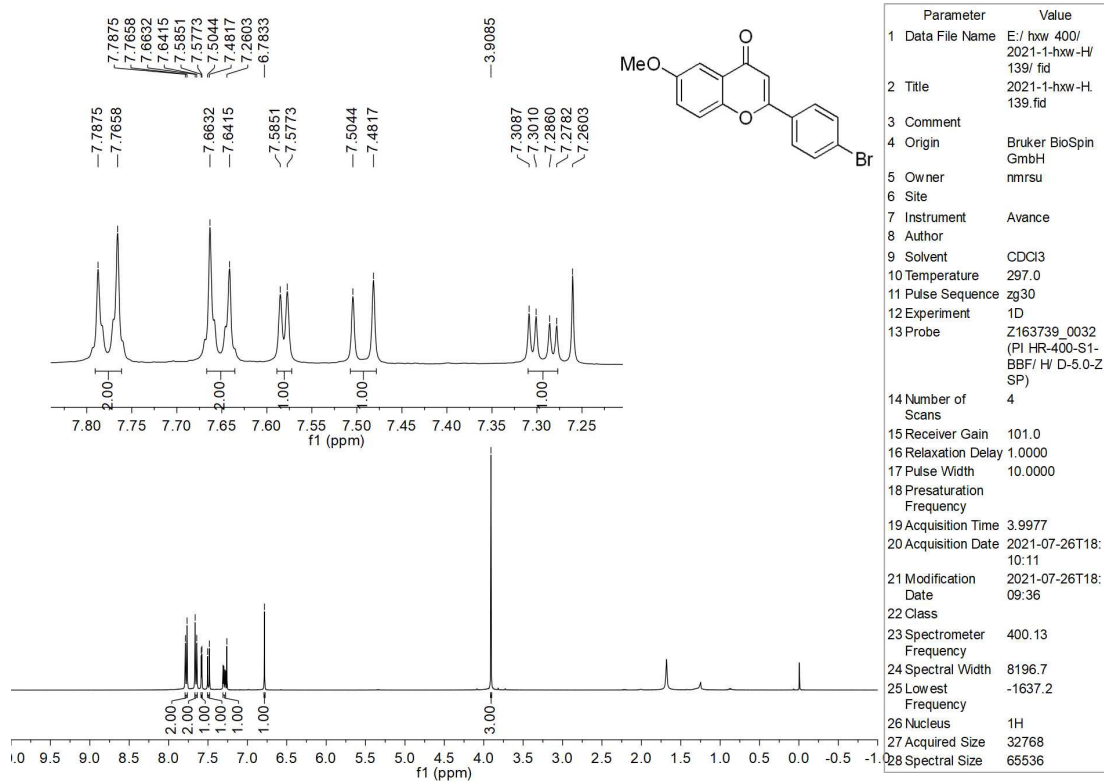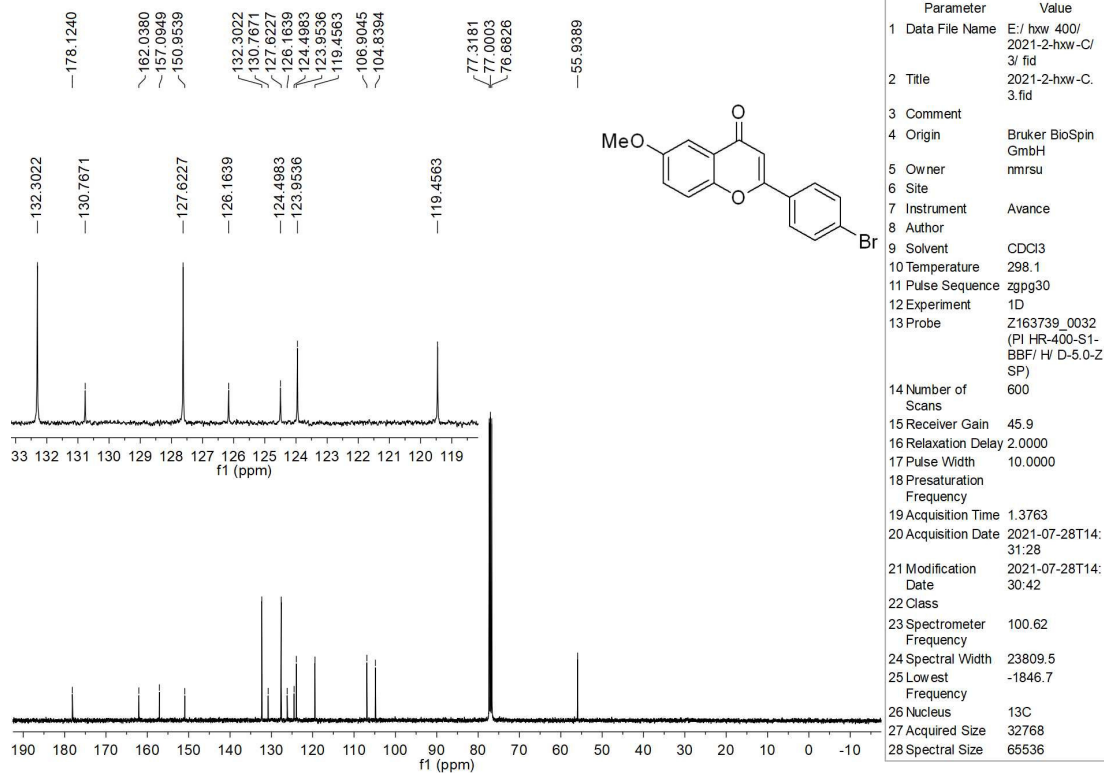

# 6-Chloro-2-(*p*-tolyl)-4*H*-chromen-4-one (2db)

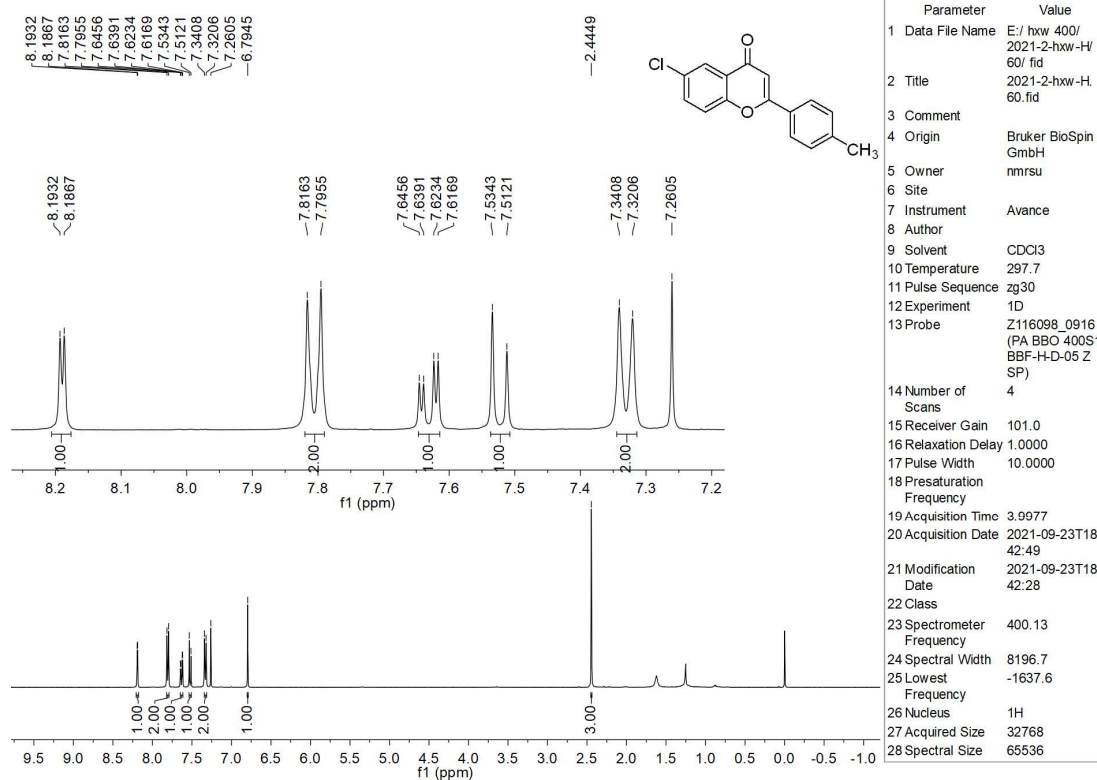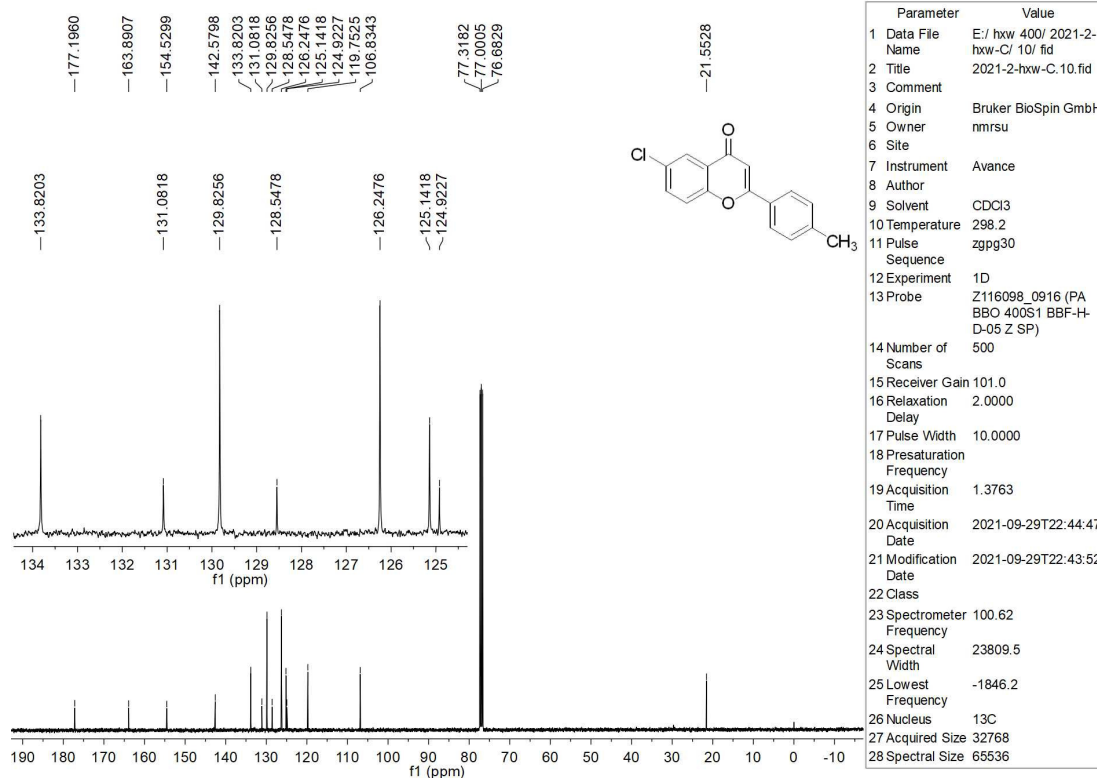

# 6-Chloro-2-(4-methoxyphenyl)-4H-chromen-4-one (2dc)

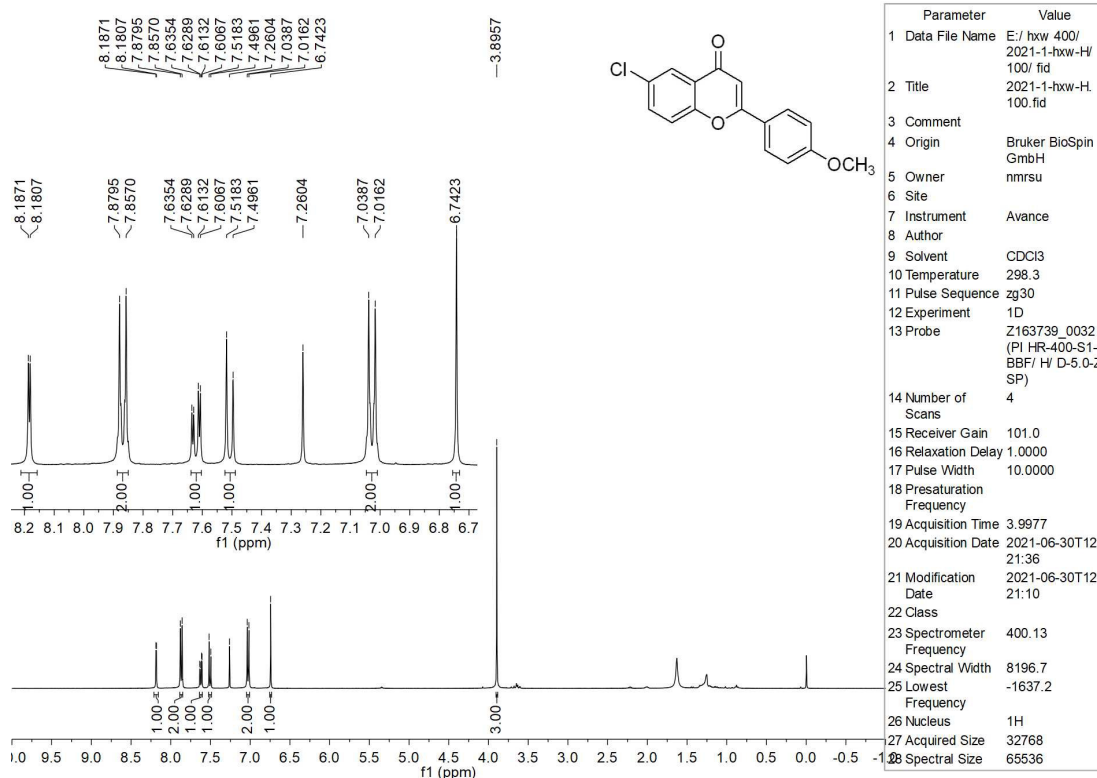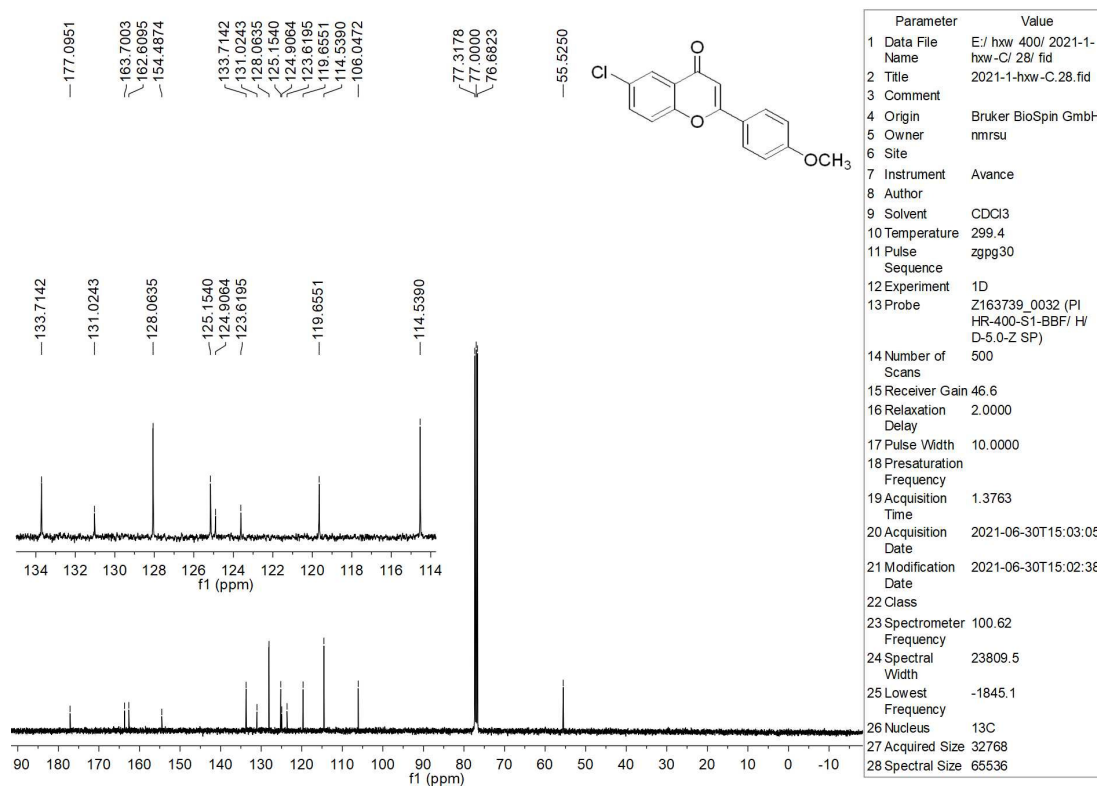

# 6-Chloro-2-(4-chlorophenyl)-4H-chromen-4-one (2de)

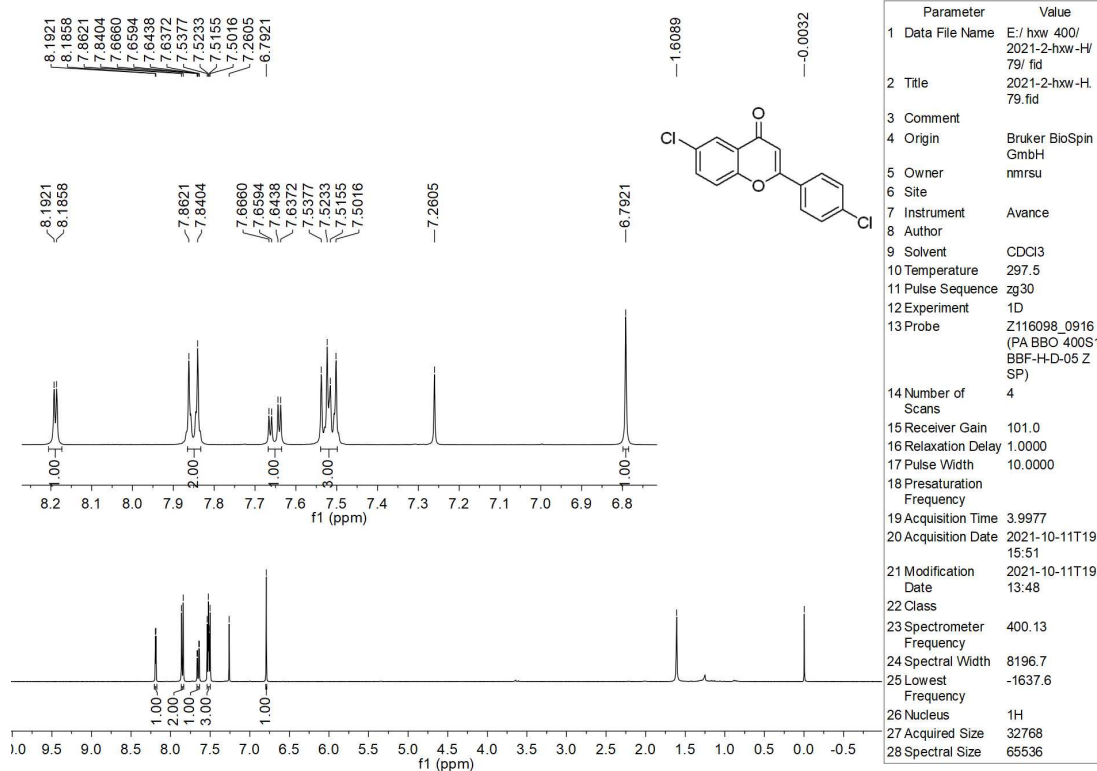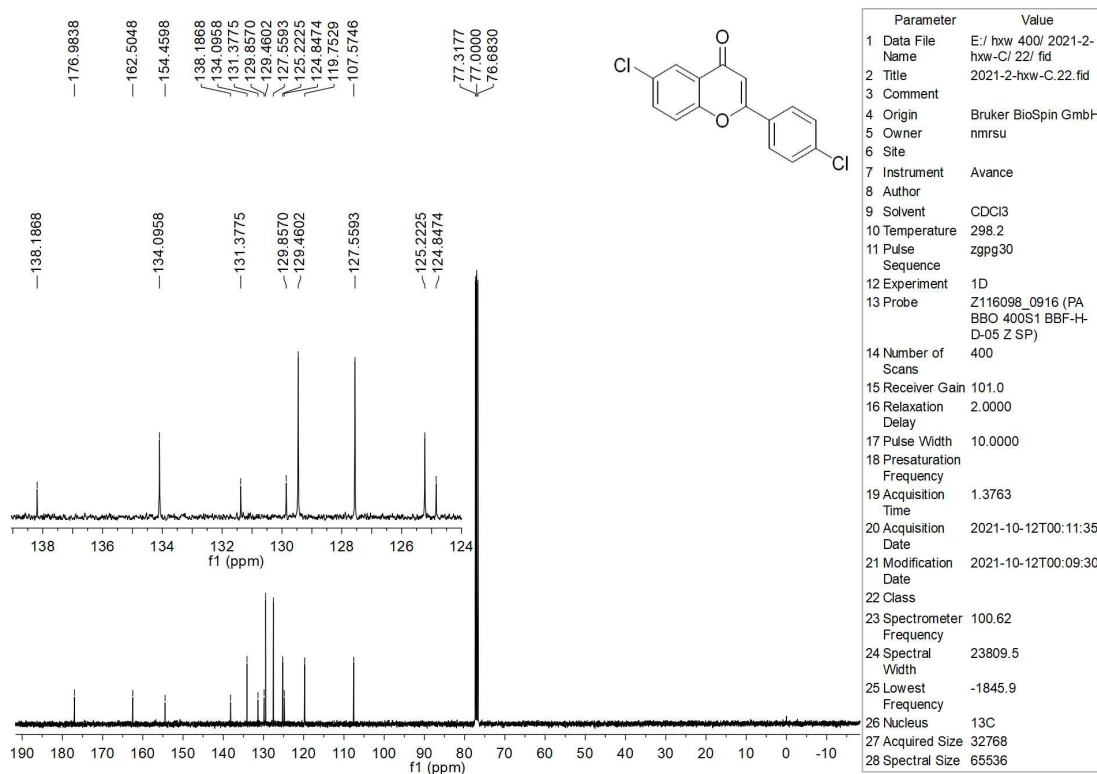



## 2-(4-Bromophenyl)-6-chloro-4H-chromen-4-one (2df)

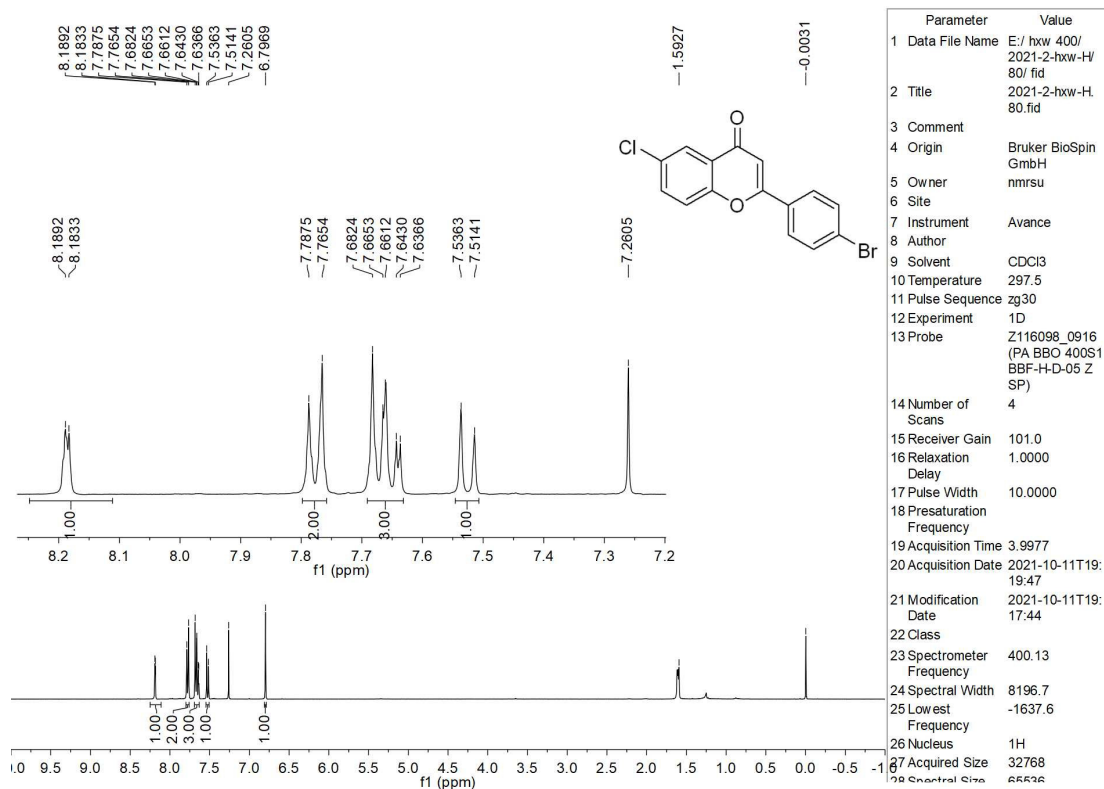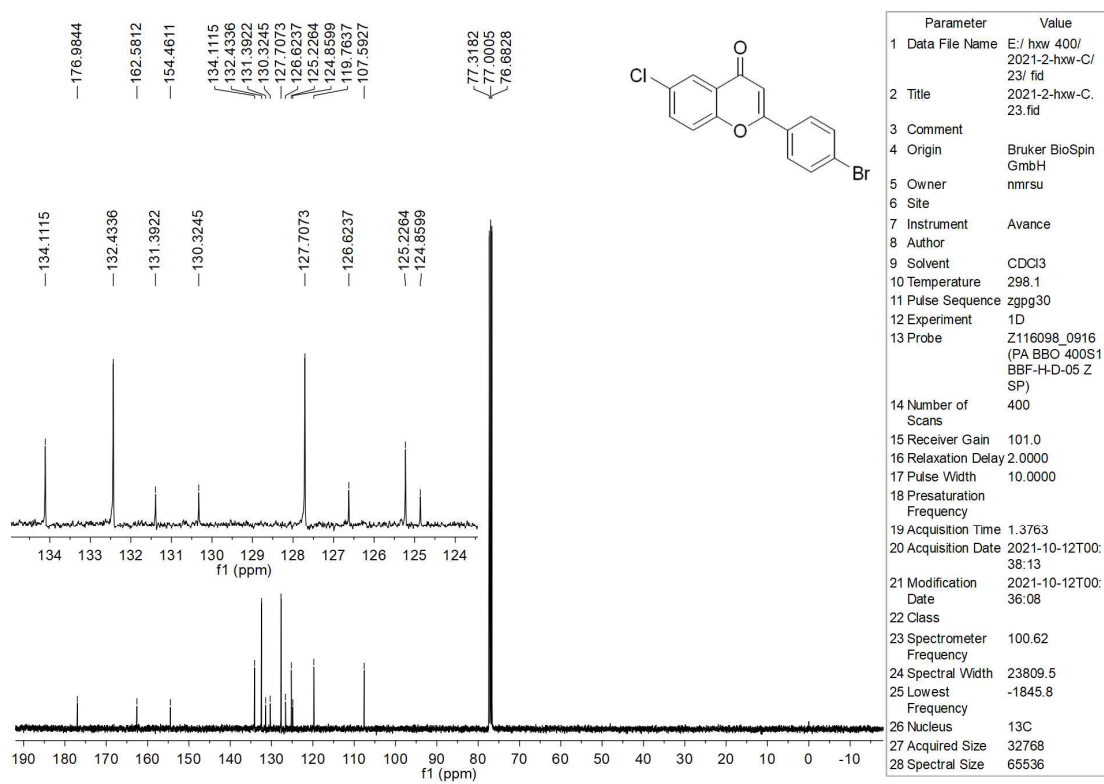

# 6-Bromo-2-(*p*-tolyl)-4*H*-chromen-4-one (2eb)

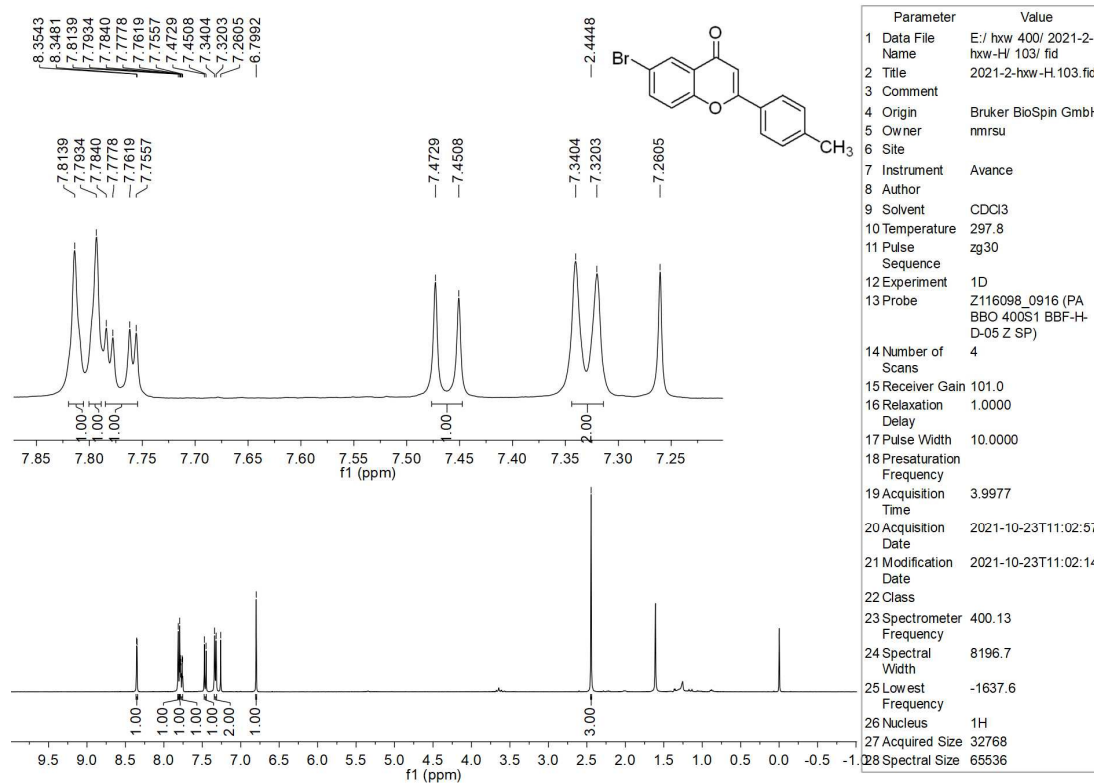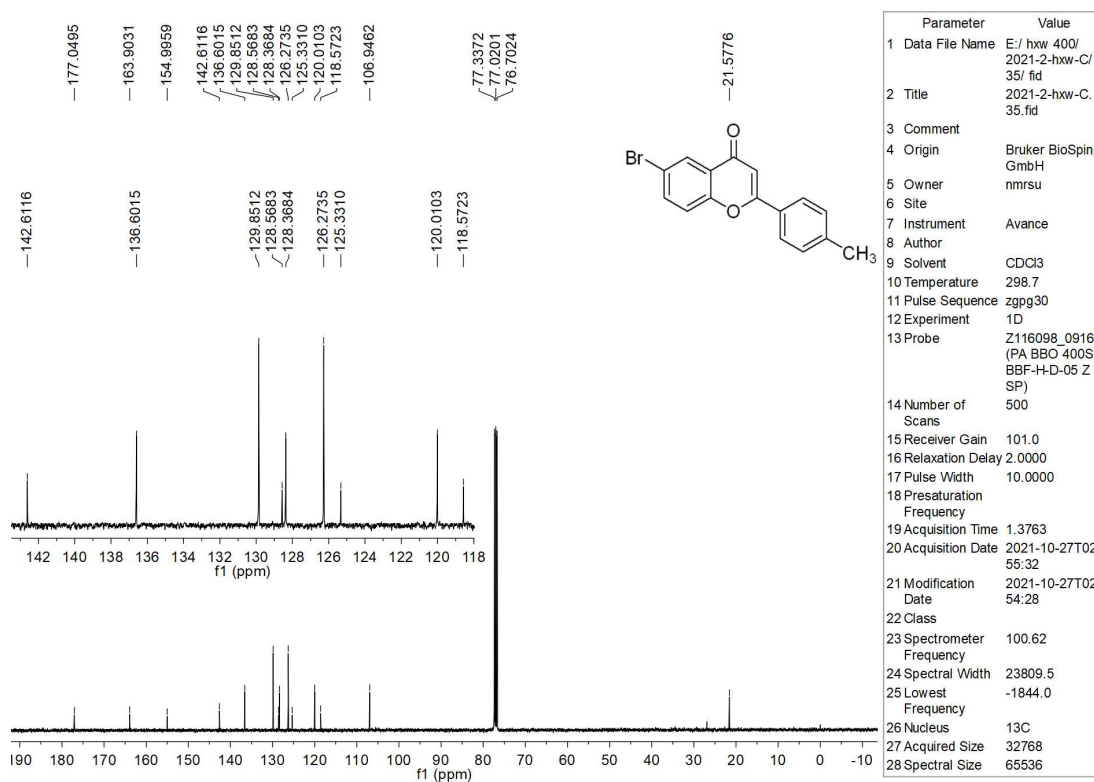

Chemical structure of 6-bromo-2-(4-methoxyphenyl)chromone (39):

COc1ccc(cc1)/C=C2/C(=O)c3cc(Br)ccc3O2

<sup>1</sup>H NMR spectrum (CDCl<sub>3</sub>) showing peaks and integration values:

| Chemical Shift (ppm)                           | Integration |
|------------------------------------------------|-------------|
| 8.3446, 8.3384                                 | 2.00        |
| 7.8814, 7.8741, 7.8691, 7.8568, 7.8517, 7.8446 | 1.00        |
| 7.7714, 7.7652, 7.7483, 7.7431                 | 1.00        |
| 7.4543, 7.4322                                 | 1.00        |
| 7.2603                                         | 1.00        |
| 7.0426, 7.0354, 7.0304, 7.0180, 7.0130, 7.0058 | 2.00        |
| 3.937                                          | 3.00        |

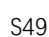

# **6-Bromo-2-(4-chlorophenyl)-4H-chromen-4-one (2ee)**

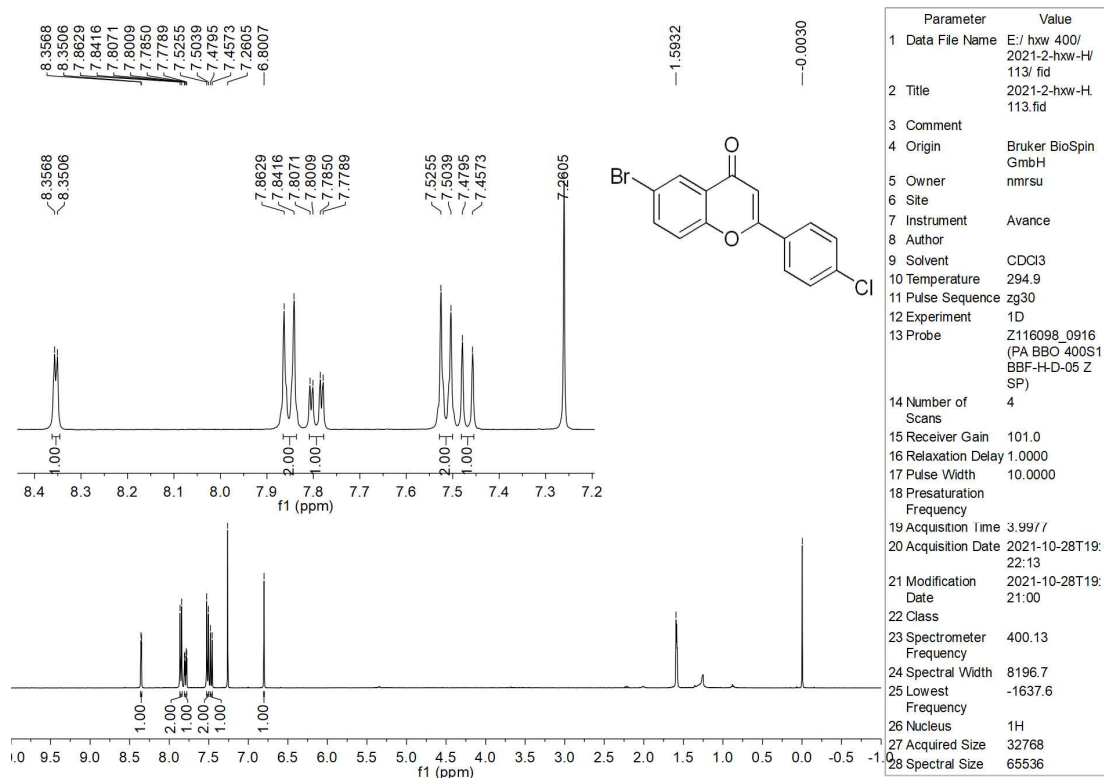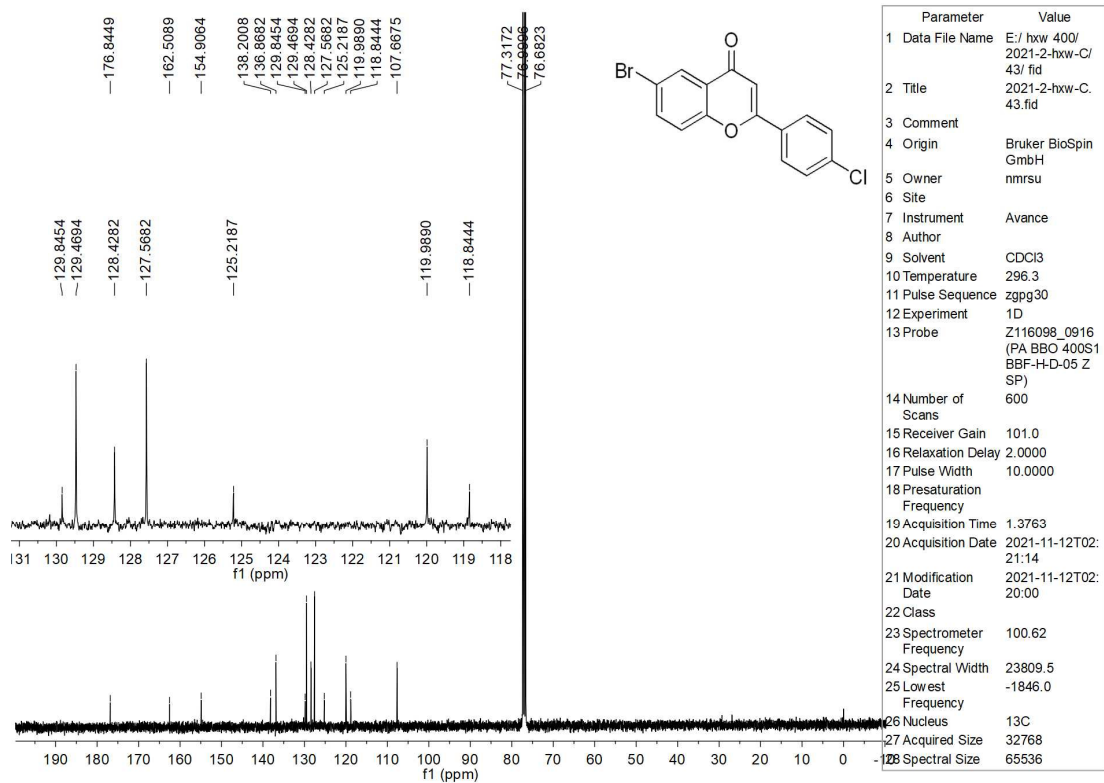

# 6-Bromo-2-(4-bromophenyl)-4H-chromen-4-one (2ef)

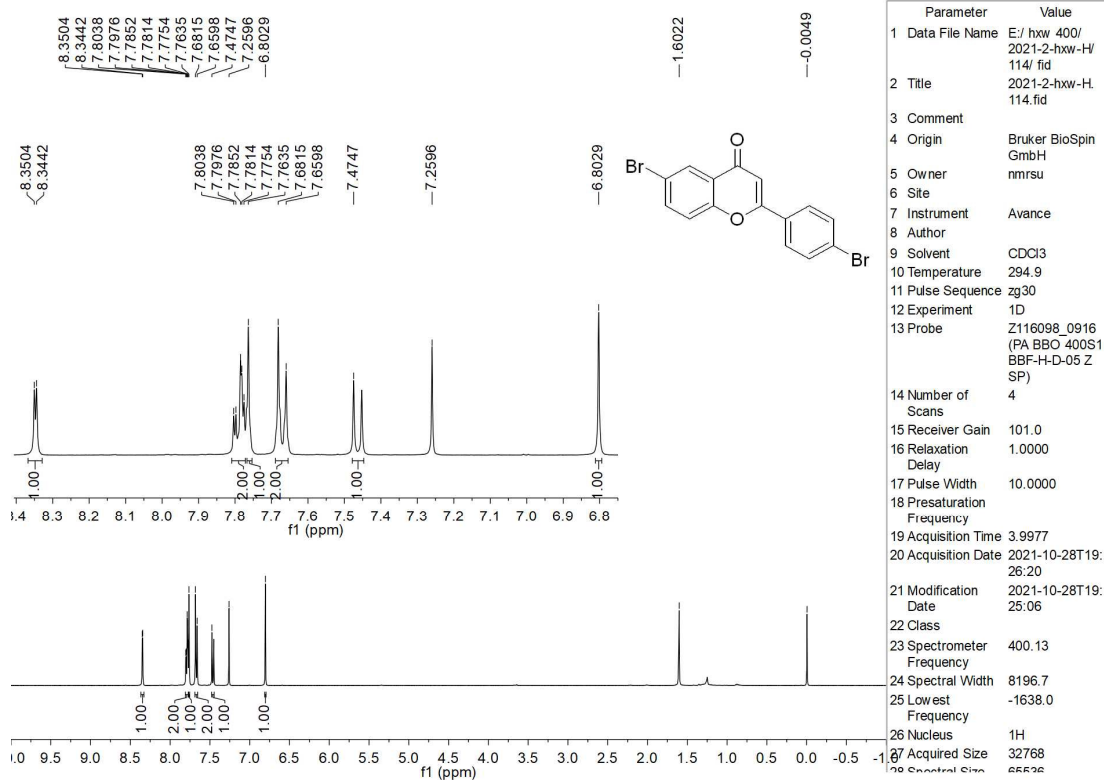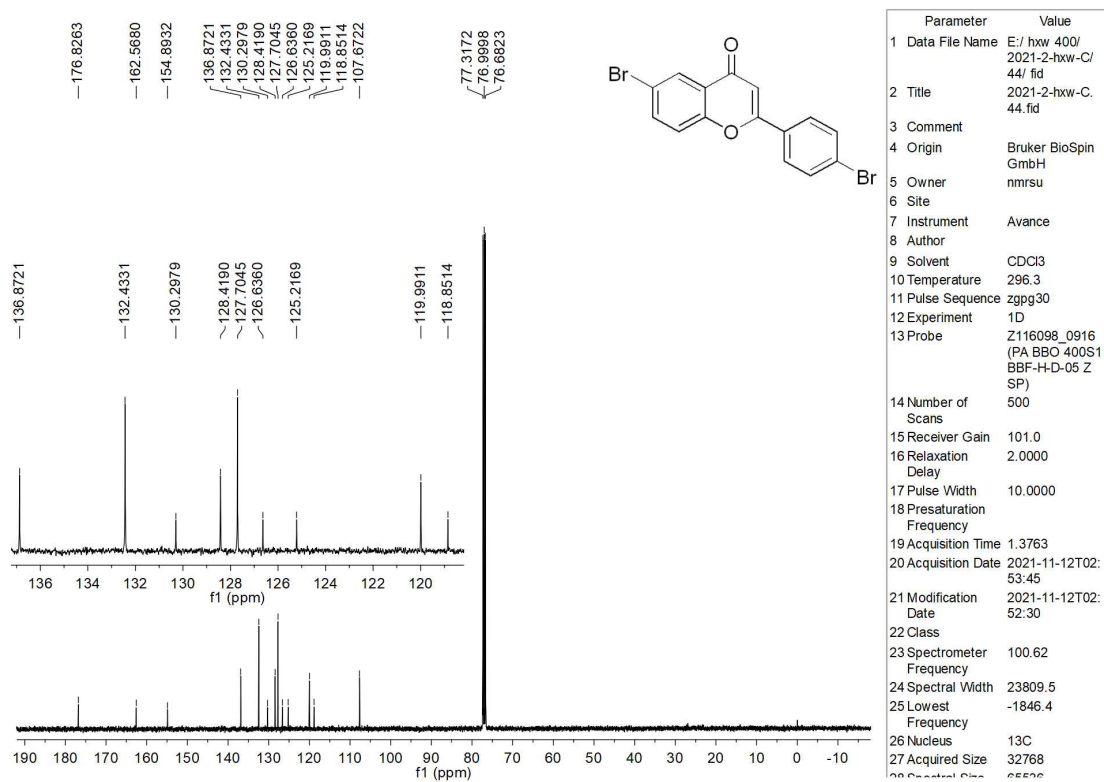



# 6-Bromo-2-(4-ethylphenyl)-4H-chromen-4-one (2en)

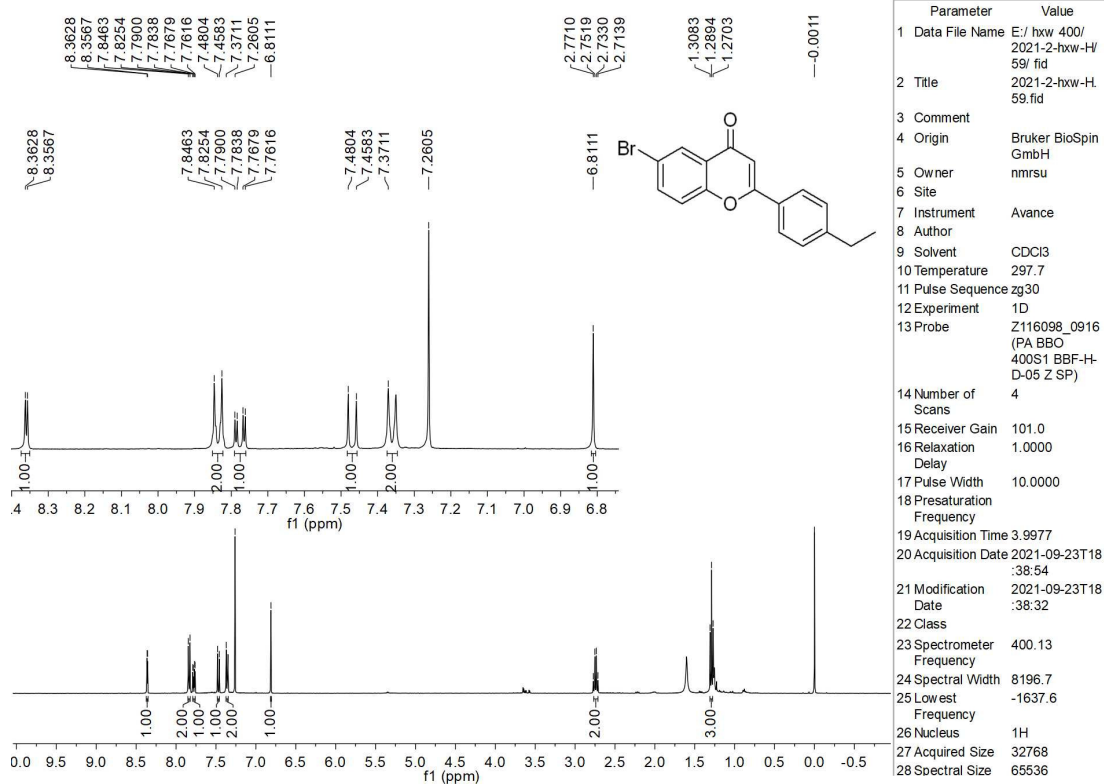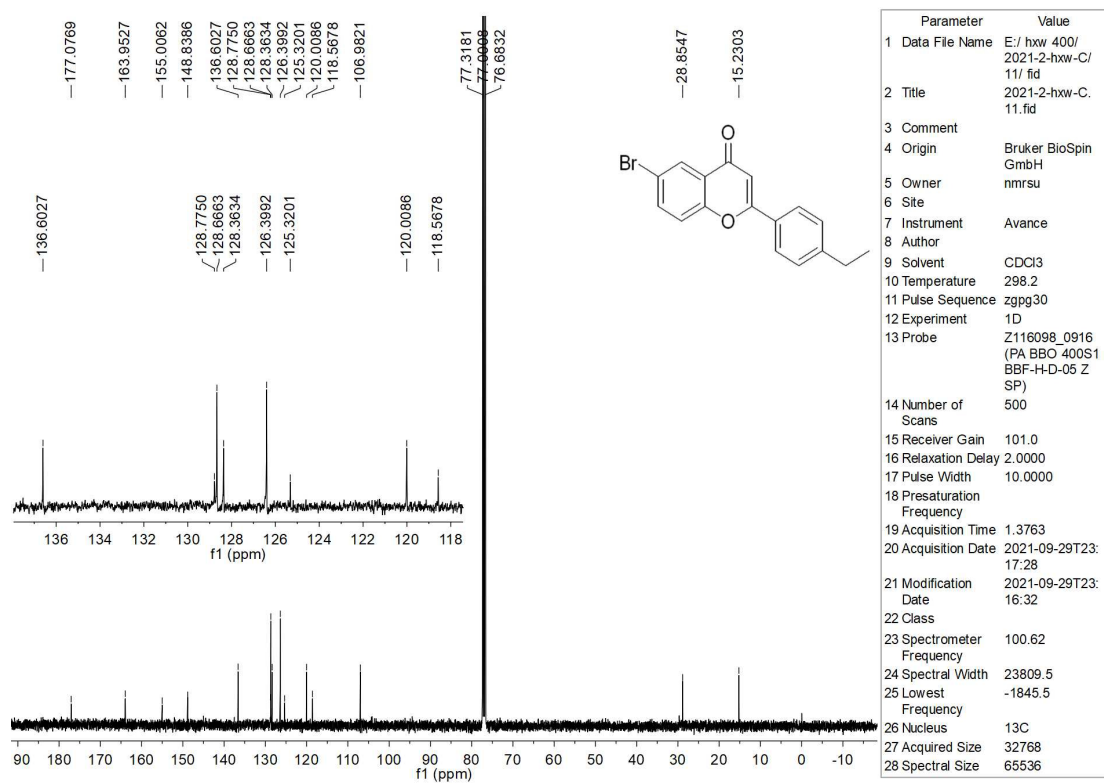



# Butyl (*E*)-3-(4-oxo-2-phenyl-4*H*-chromen-5-yl)acrylate (4aa)

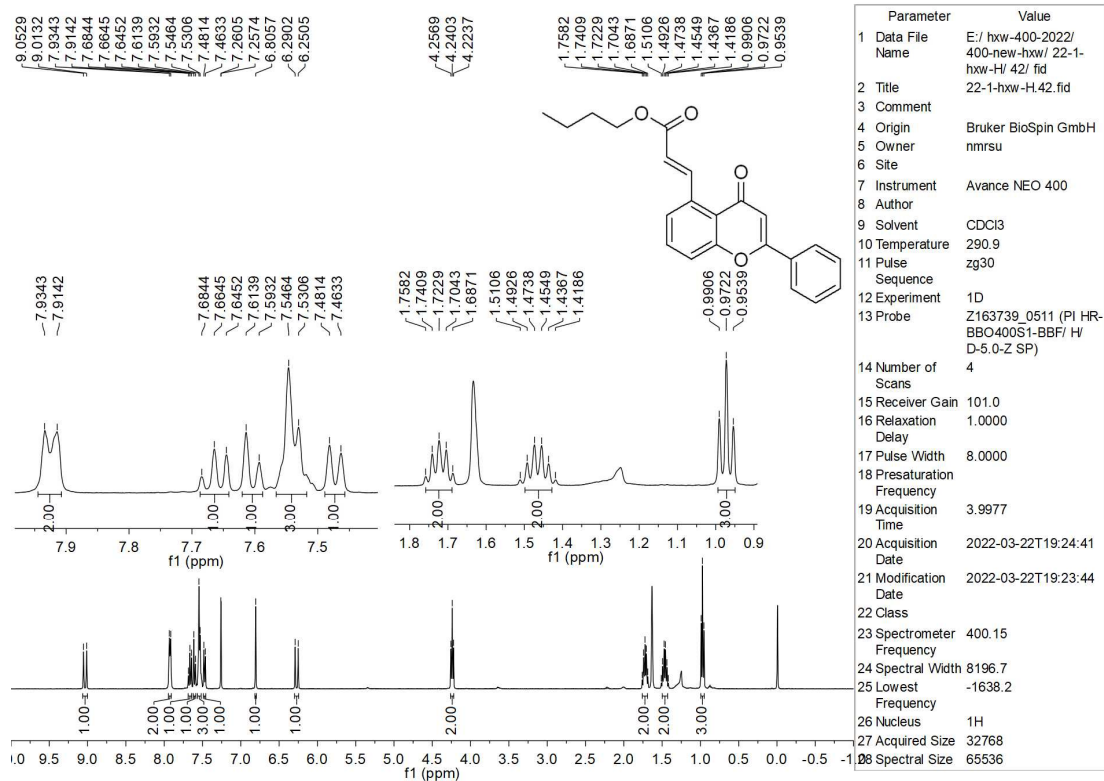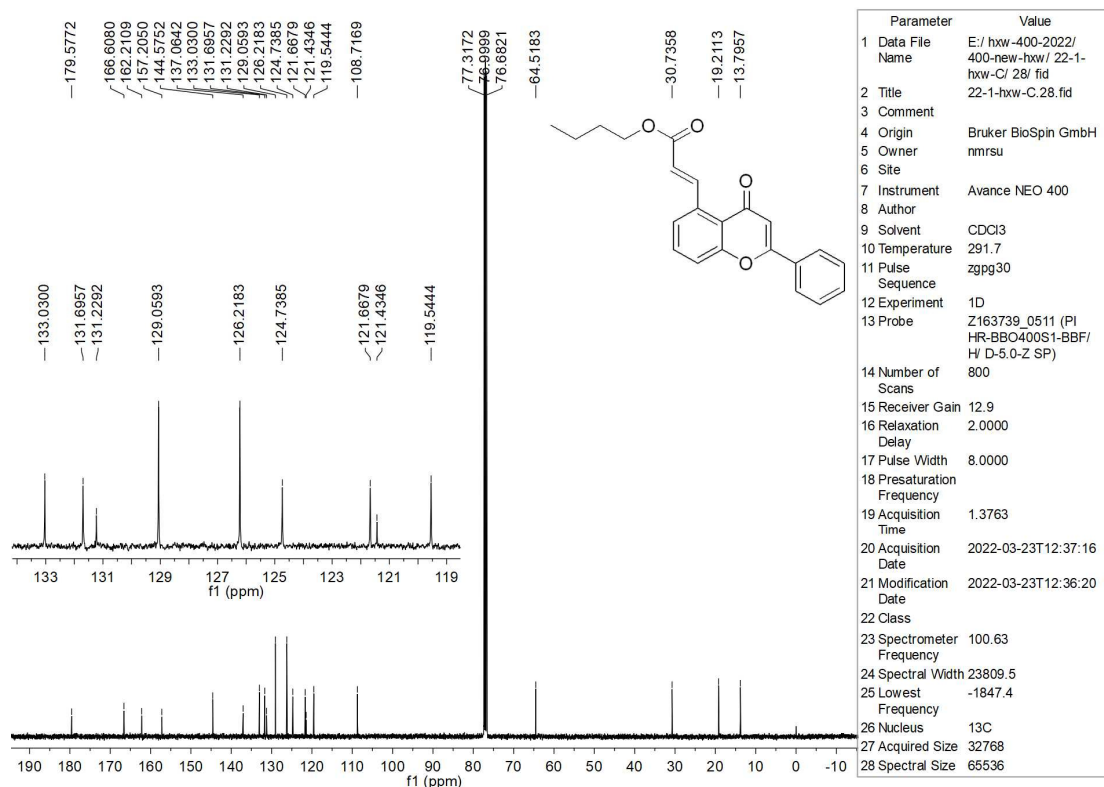

# Butyl (*E*)-3-(4-oxo-2-(*p*-tolyl)-4*H*-chromen-5-yl)acrylate (4ab)

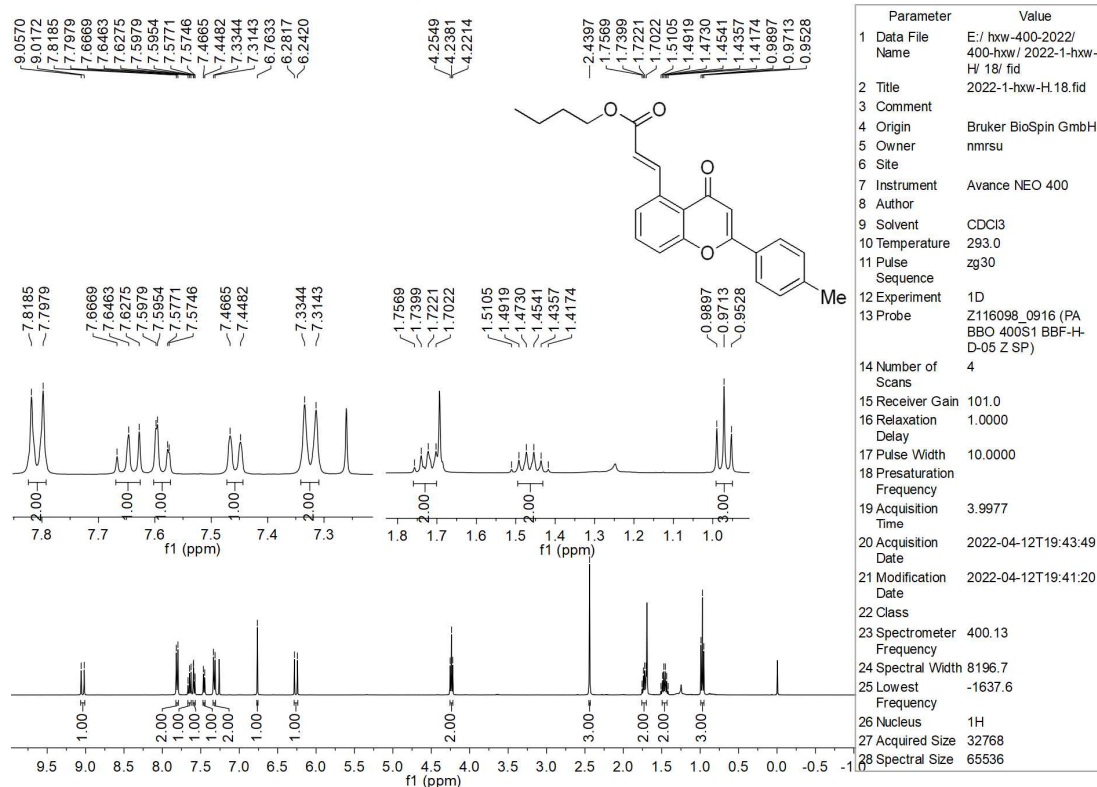

| Parameter                  | Value                                            |
|----------------------------|--------------------------------------------------|
| 1 Data File Name           | E:/ hwx-400-2022/ 400-hwx/ 2022-1-hwx-H/ 18/ fid |
| 2 Title                    | 2022-1-hwx-H.18.fid                              |
| 3 Comment                  |                                                  |
| 4 Origin                   | Bruker BioSpin GmbH                              |
| 5 Owner                    | nmrsu                                            |
| 6 Site                     |                                                  |
| 7 Instrument               | Avance NEO 400                                   |
| 8 Author                   |                                                  |
| 9 Solvent                  | CDCl3                                            |
| 10 Temperature             | 293.0                                            |
| 11 Pulse Sequence          | zg30                                             |
| 12 Experiment              | 1D                                               |
| 13 Probe                   | Z116098_0916 (PA BBO 400S1 BBF-H- D-05 Z SP)     |
| 14 Number of Scans         | 4                                                |
| 15 Receiver Gain           | 101.0                                            |
| 16 Relaxation Delay        | 1.0000                                           |
| 17 Pulse Width             | 10.0000                                          |
| 18 Presaturation Frequency |                                                  |
| 19 Acquisition Time        | 3.9977                                           |
| 20 Acquisition Date        | 2022-04-12T19:43:49                              |
| 21 Modification Date       | 2022-04-12T19:41:20                              |
| 22 Class                   |                                                  |
| 23 Spectrometer Frequency  | 400.13                                           |
| 24 Spectral Width          | 8196.7                                           |
| 25 Lowest Frequency        | -1637.6                                          |
| 26 Nucleus                 | 1H                                               |
| 27 Acquired Size           | 32768                                            |
| 28 Spectral Size           | 65536                                            |

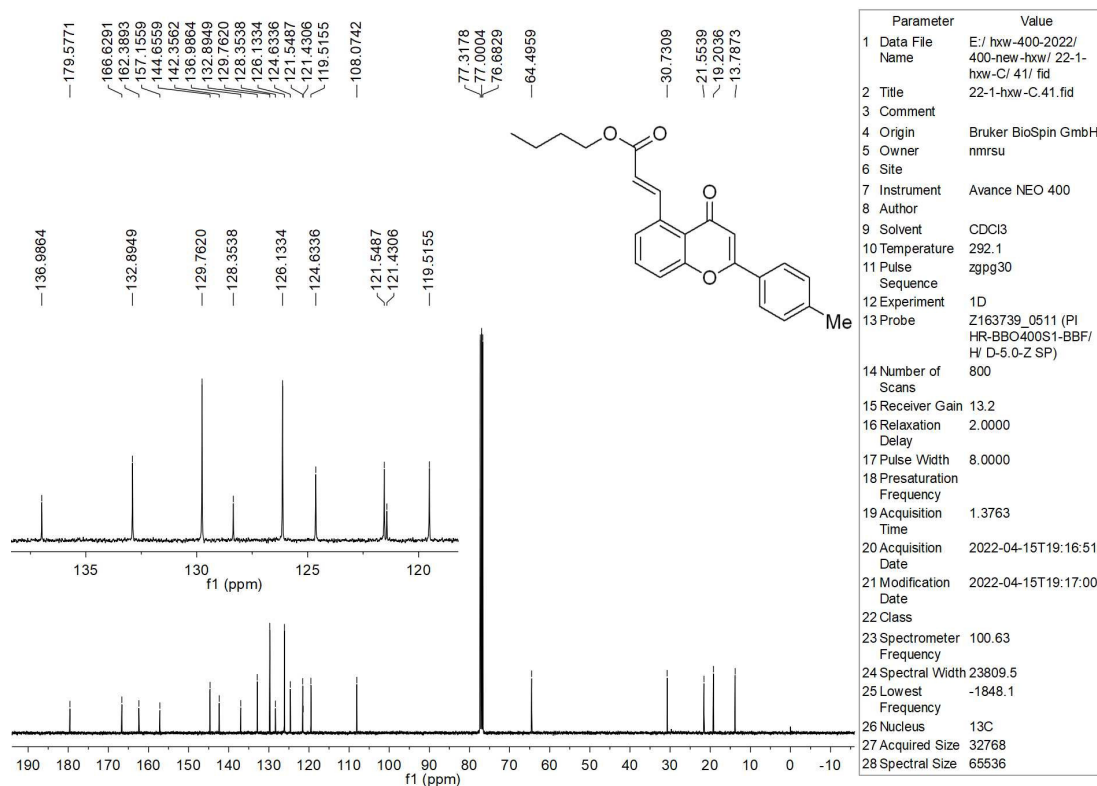

| Parameter                  | Value                                              |
|----------------------------|----------------------------------------------------|
| 1 Data File Name           | E:/ hwx-400-2022/ 400-new-hwx/ 22-1-hwx-C/ 41/ fid |
| 2 Title                    | 22-1-hwx-C.41.fid                                  |
| 3 Comment                  |                                                    |
| 4 Origin                   | Bruker BioSpin GmbH                                |
| 5 Owner                    | nmrsu                                              |
| 6 Site                     |                                                    |
| 7 Instrument               | Avance NEO 400                                     |
| 8 Author                   |                                                    |
| 9 Solvent                  | CDCl3                                              |
| 10 Temperature             | 292.1                                              |
| 11 Pulse Sequence          | zgpg30                                             |
| 12 Experiment              | 1D                                                 |
| 13 Probe                   | Z163739_0511 (PI HR-BBO400S1-BBF/ H/ D-5.0-Z SP)   |
| 14 Number of Scans         | 800                                                |
| 15 Receiver Gain           | 13.2                                               |
| 16 Relaxation Delay        | 2.0000                                             |
| 17 Pulse Width             | 8.0000                                             |
| 18 Presaturation Frequency |                                                    |
| 19 Acquisition Time        | 1.3763                                             |
| 20 Acquisition Date        | 2022-04-15T19:16:51                                |
| 21 Modification Date       | 2022-04-15T19:17:00                                |
| 22 Class                   |                                                    |
| 23 Spectrometer Frequency  | 100.63                                             |
| 24 Spectral Width          | 23809.5                                            |
| 25 Lowest Frequency        | -1848.1                                            |
| 26 Nucleus                 | 13C                                                |
| 27 Acquired Size           | 32768                                              |
| 28 Spectral Size           | 65536                                              |

# Butyl (E)-3-(2-(4-bromophenyl)-4-oxo-4H-chromen-5-yl)acrylate (4af)

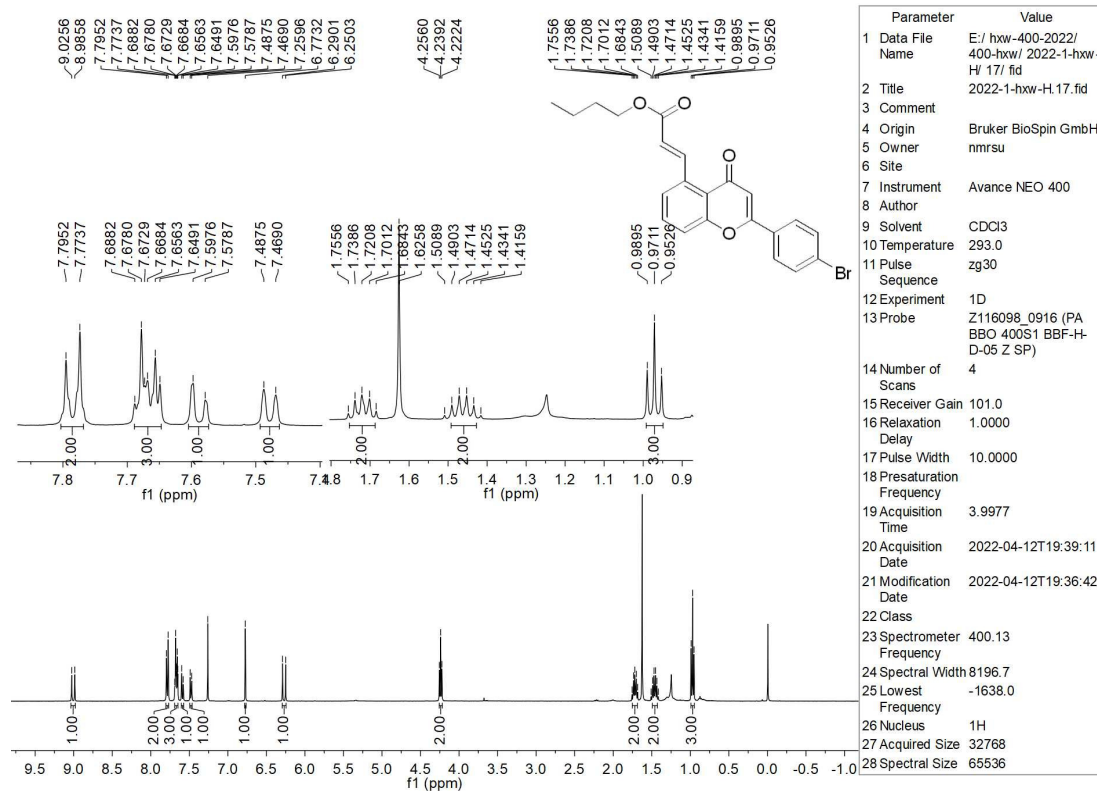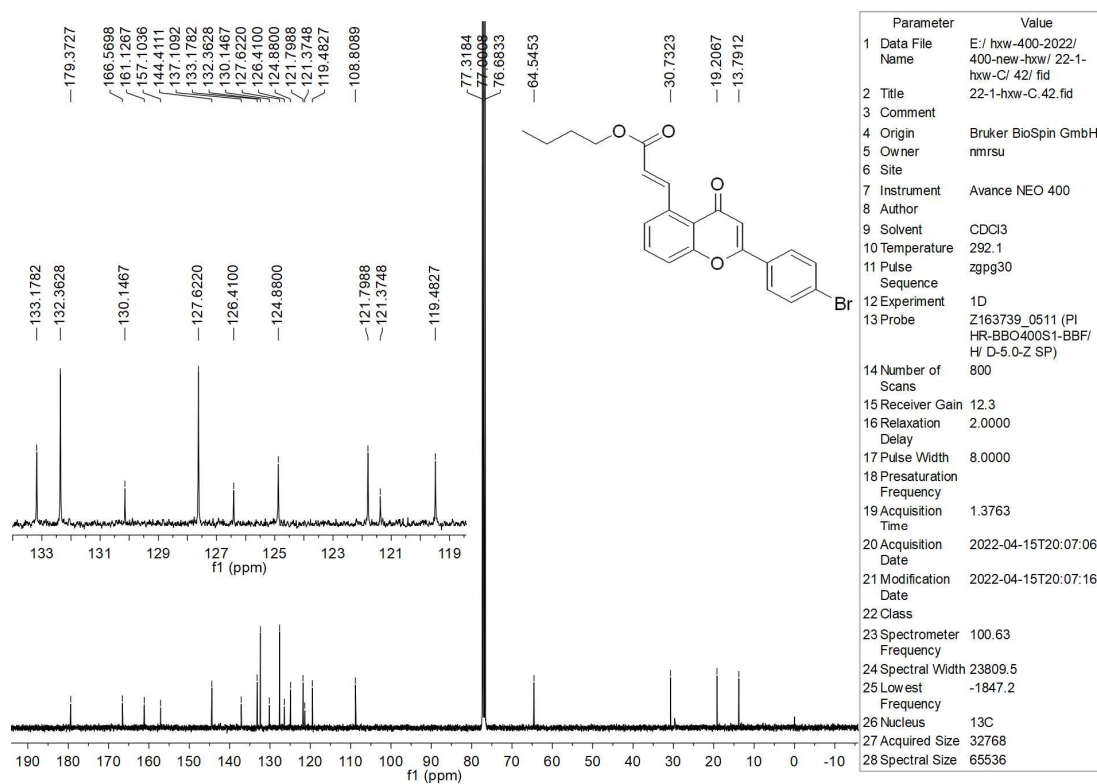

## 9. GC-MS spectra for mechanistic investigations

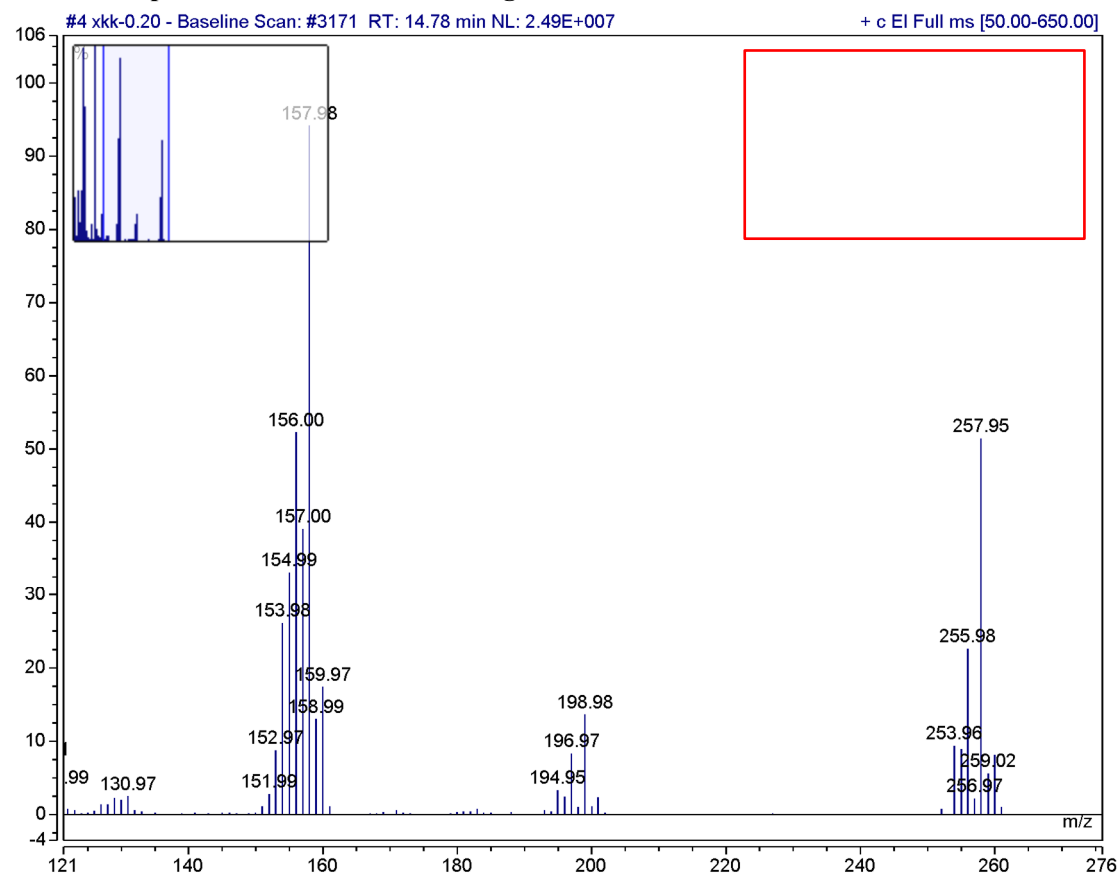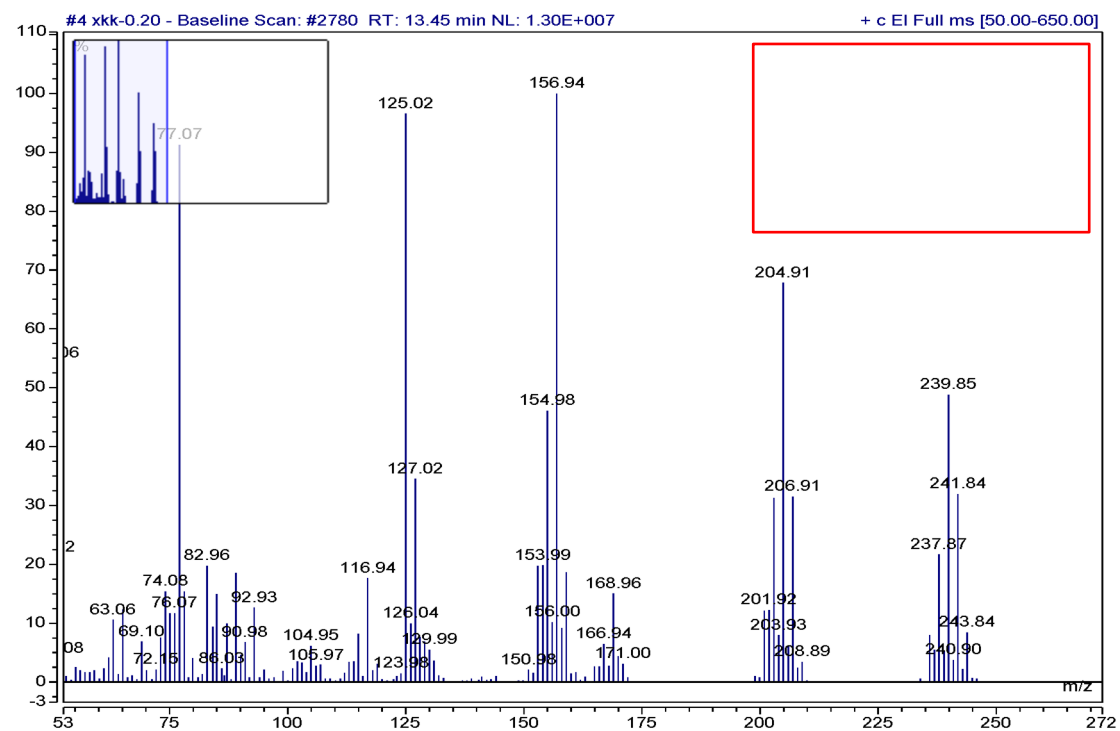

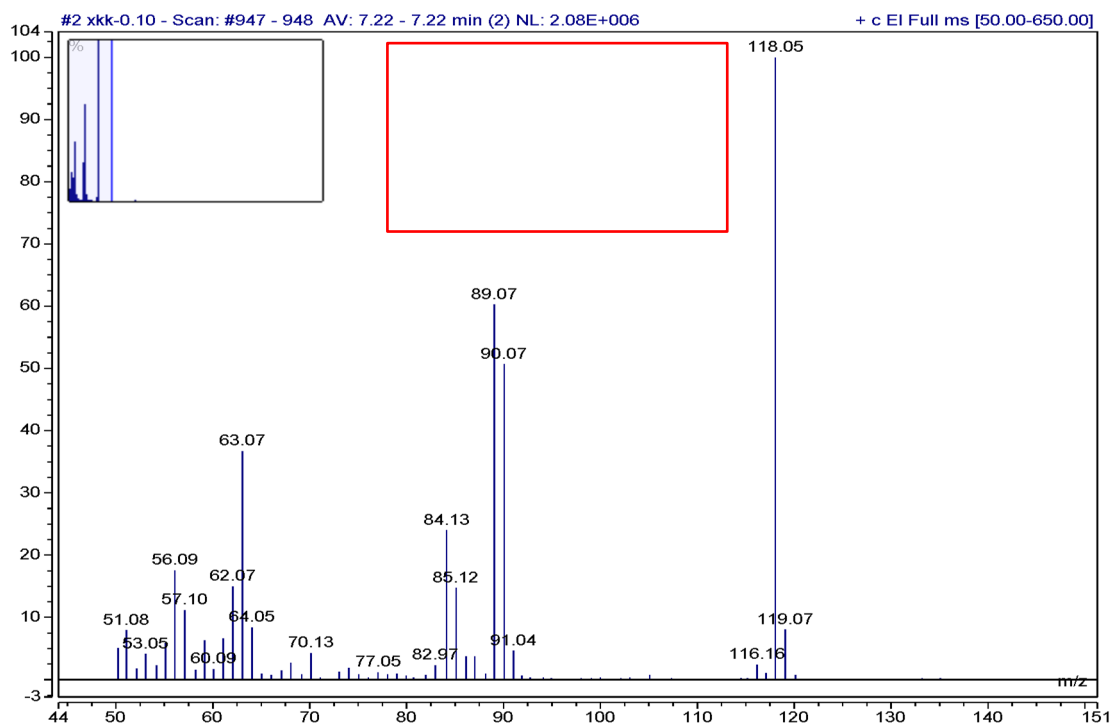

**Figure S4.** GC-MS spectra of methyl 2-hydroxy-2-methylpropanoate

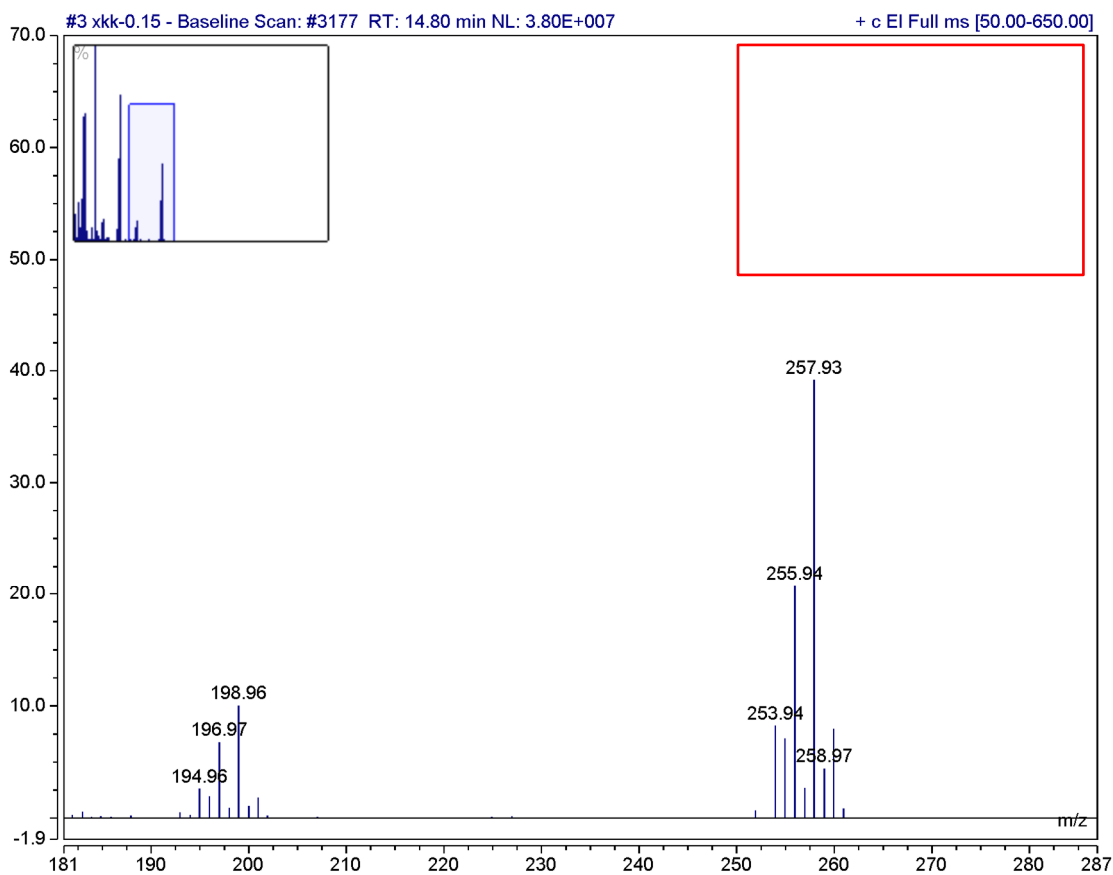

**Figure S5.** GC-MS spectra of the control experiment in the presence of TEMPO.

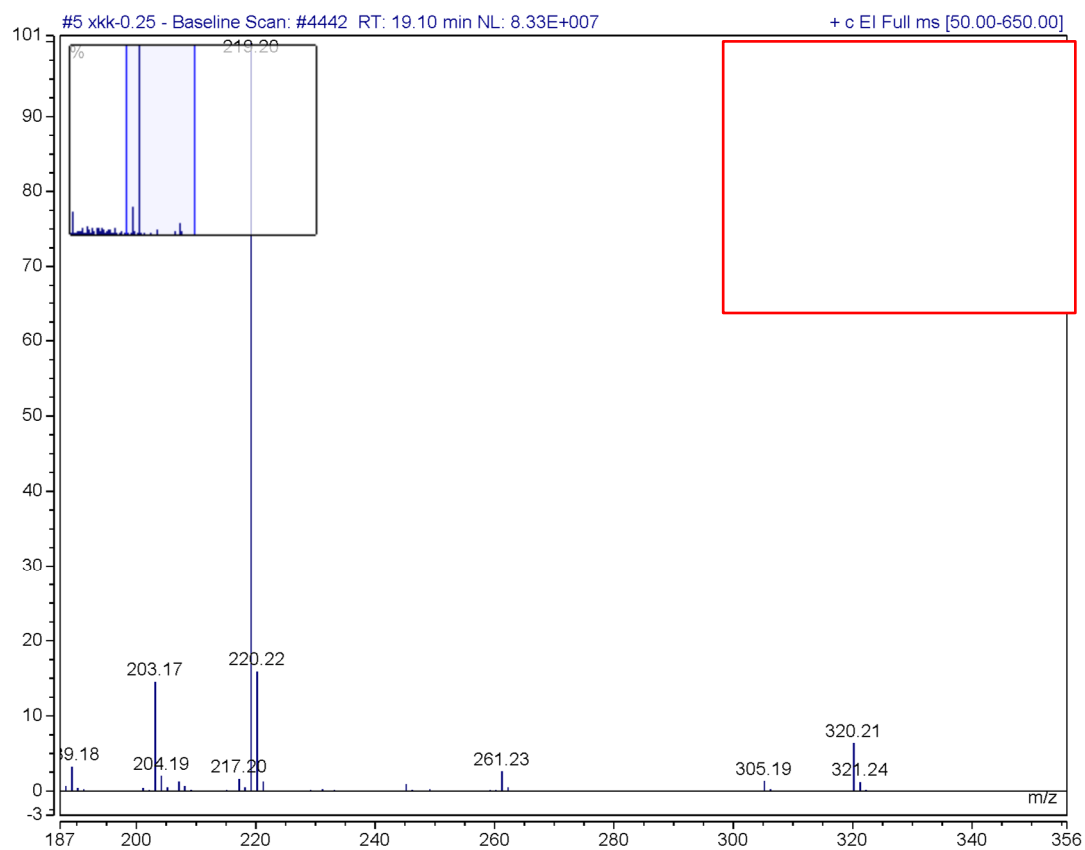

**Figure S6.** GC-MS spectra of the control experiment in the presence of BHT.
